# Supplementary material
Source: publisher figshare collection journal article supplement (https://acs.figshare.com/ndownloader/files/4732042)

# SUPPORTING INFORMATION

## Synthesis of Tricyclic Heterocycles via a Tandem Aryl Alkylation/Heck Coupling Sequence

*Dino Alberico, Alena Rudolph, and Mark Lautens\**

Davenport Research Laboratories, Department of Chemistry, University of Toronto, Toronto,  
Ontario, Canada, M5S 3H6

### **Table of Contents**

|                                          |          |
|------------------------------------------|----------|
| General Experimental                     | page S2  |
| Synthesis of Aryl Iodides                | page S2  |
| Alkylation/Alkenylation Reactions        | page S16 |
| Synthesis of Mescaline Analogue <b>2</b> | page S31 |
| References                               | page S38 |
| NMR Spectra                              | page S39 |

## **General Experimental**

The following includes general experimental procedures, specific details for representative reactions, isolation and spectroscopic information for new compounds. Microwave-assisted reactions were performed in an Emrys Liberator model from Biotage (formerly Personal Chemistry) using Biotage Microwave Vials (2-5 mL). Microwave irradiation time was conducted using ramp time and hold time at the final temperature.  $^1\text{H}$  NMR spectra were measured on spectrometers at 400 MHz or 300 MHz.  $^{13}\text{C}$  NMR spectra were measured on spectrometers at 100 MHz or 75 MHz.  $^1\text{H}$  spectra were referenced to tetramethylsilane (TMS, 0 ppm) or solvent hydrogens (3.31 ppm for  $\text{CD}_3\text{OD}$  and 2.50 for  $\text{DMSO-d}_6$ ).  $^{13}\text{C}$  spectra were referenced to solvent carbons (77.23 ppm for  $\text{CDCl}_3$ , 49.86 ppm for  $\text{CD}_3\text{OD}$  or 39.43 ppm for  $\text{DMSO-d}_6$ ).

Diethyl ether, toluene, and tetrahydrofuran (THF) were distilled under nitrogen from Na/benzophenone immediately prior to use. 1,2-Dimethoxyethane (DME), benzene and dichloromethane ( $\text{CH}_2\text{Cl}_2$ ) was distilled under nitrogen from  $\text{CaH}_2$  immediately prior to use. All other solvents were used as received. Triphenylphosphine was recrystallized using hexane. Reactions were performed under an atmosphere of nitrogen.

## **Synthesis of Aryl Iodides**

### **1-Iodo-3,5-dimethoxybenzene (52).**

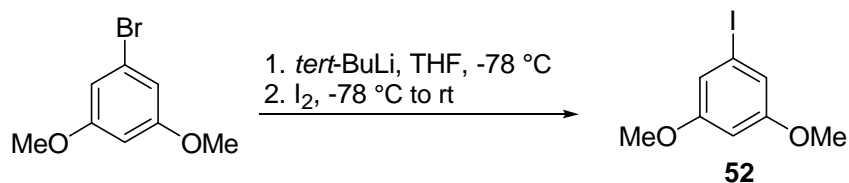

To a -78 °C solution of 1-bromo-3,5-dimethoxybenzene (10.0 g, 46.1 mmol, 1 equiv) in THF (60 mL) was added dropwise *tert*-butyllithium (61 mL, 104 mmol, 1.7 M in pentane, 2.25 equiv). The reaction was stirred for 1 h at -78 °C then iodine (35.1 g, 138 mmol, 3 equiv) in THF (70 mL)

was added *via* cannula. The resulting mixture was stirred at -78 °C for 1 h then warmed to rt, quenched with water (100 mL) and diluted with CH<sub>2</sub>Cl<sub>2</sub> (300 mL). The organic layer was washed with saturated aqueous Na<sub>2</sub>S<sub>2</sub>O<sub>3</sub>, brine, dried with anhydrous MgSO<sub>4</sub>, filtered and concentrated. The crude mixture was purified by flash chromatography using 10% EtOAc/hexanes as eluant to yield **52** (11.8 g, 98%) as a white solid, mp = 74-75 °C. R<sub>f</sub> = 0.69 on silica gel (10% EtOAc/hexanes). IR (neat)  $\nu$  = 1577, 1425, 1294, 1199, 1164, 1032 cm<sup>-1</sup>; <sup>1</sup>H NMR (300 MHz, CDCl<sub>3</sub>)  $\delta$  6.85 (d, 2H, *J* = 2.2 Hz), 6.40 (t, 1H, *J* = 2.2 Hz), 3.76 (s, 6H); <sup>13</sup>C NMR (75 MHz, CDCl<sub>3</sub>)  $\delta$  161.2, 116.0, 100.8, 94.3, 55.7; HRMS calcd for C<sub>8</sub>H<sub>9</sub>IO<sub>2</sub> [M]<sup>+</sup> 263.9654, found 263.9647.

#### 5-Iodobenzene-1,3-diol (**53**).<sup>1</sup>

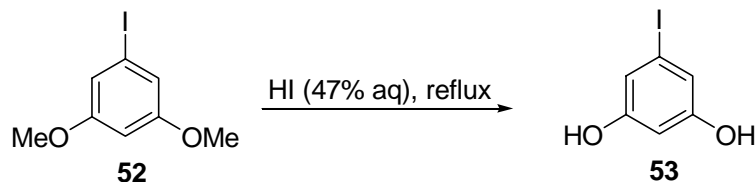

A solution of **52** (8.30 g, 31.4 mmol, 1 equiv) and HI (47 wt. % in water, 75 mL) was refluxed for 24 h. The solution was cooled to rt and diluted with water (100 mL) followed by the addition of ether (100 mL). The organic layer was separated and washed with 1 M sodium thiosulfate solution (2 × 75 mL) and once with water (50 mL). After drying with MgSO<sub>4</sub>, removal of the solvent gave a crude oil that was purified by flash chromatography using 25% EtOAc/hexanes yielding **53** (6.90 g, 93%) as a white solid, mp = 93-95 °C. R<sub>f</sub> = 0.21 on silica gel (25% EtOAc/hexanes). Spectral data match the previously reported data.<sup>1</sup>

### 1,3-Bis(2-bromoethoxy)-5-iodobenzene (**5**).

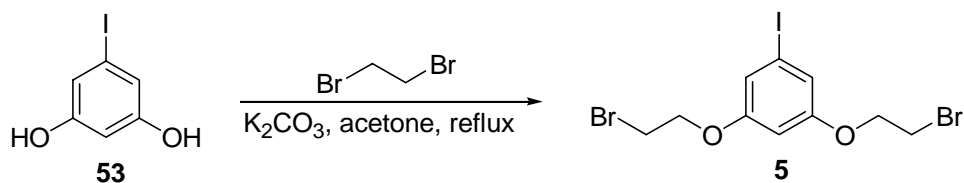

To a solution of **53** (8.00 g, 33.9 mmol, 1 equiv) and 1,2-dibromoethane (44 mL, 508 mmol, 15 equiv) in acetone (70 mL) was added K<sub>2</sub>CO<sub>3</sub> (23.4 g, 170 mmol, 5 equiv). The mixture was stirred at reflux for 36 h. The reaction was cooled to rt and filtered through celite. Distillation of excess 1,2-dibromoethane gave a crude oil that was purified by flash chromatography using 10% EtOAc/hexanes as eluant yielding **5** (9.30 g, 62%) as a white solid, mp = 97-98 °C. *R*<sub>f</sub> = 0.75 on silica gel (25% EtOAc/hexanes). IR (neat)  $\nu$  = 1421, 1168, 1052 cm<sup>-1</sup>; <sup>1</sup>H NMR (300 MHz, CDCl<sub>3</sub>)  $\delta$  6.89 (s, 2H), 6.44 (s, 1H), 4.24 (t, 4H, *J* = 6.0 Hz), 3.61 (t, 4H, *J* = 6.0 Hz); <sup>13</sup>C NMR (75 MHz, CDCl<sub>3</sub>)  $\delta$  159.8, 117.4, 102.3, 94.3, 68.3, 28.9; HRMS calcd for C<sub>10</sub>H<sub>11</sub>Br<sub>2</sub>IO<sub>2</sub> [M]<sup>+</sup> 447.8161, found 447.8170.

### 1,3-Bis(2-bromo-1-*tert*-butoxyethoxy)-5-iodobenzene (**16**)

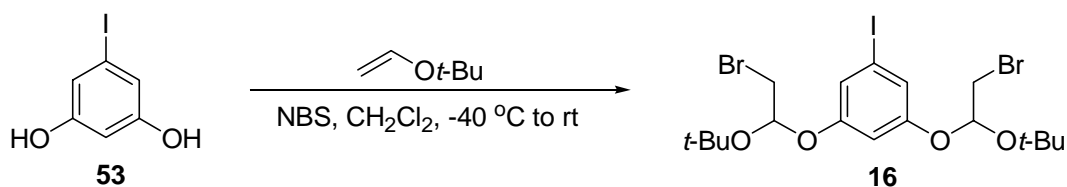

*tert*-Butyl vinyl ether (0.51 mL, 3.9 mmol, 2 equiv) was added to a solution of NBS (686 mg, 3.9 mmol, 2 equiv) in CH<sub>2</sub>Cl<sub>2</sub> (2 mL) at -40 °C. The reaction mixture was stirred at this temperature for 45 minutes. A solution of **53** (500 mg, 2.1 mmol, 1 equiv) in CH<sub>2</sub>Cl<sub>2</sub> (2 mL) and DMF (0.5 mL) was added to the reaction mixture at -40 °C and the mixture was further stirred at this temperature for 2 h. The mixture was washed successively with 5% aq NaOH (5 mL), water (5 mL) and brine (5 mL). The organic layer was dried with anhydrous MgSO<sub>4</sub>, filtered and

concentrated. The crude product was purified by flash chromatography using 5% EtOAc/hexanes eluant to afford **16** (375 mg, 30%) as a yellow oil, 1:1 mixture of diastereomers.  $R_f = 0.73$  on silica gel (25% EtOAc/hexanes). IR (neat)  $\nu = 1587, 1568, 1471, 1431, 1394, 1367, 1263, 1241, 1177, 1124, 1060, 1044, 1011, 968, 940, 921, 827 \text{ cm}^{-1}$ ;  $^1\text{H}$  NMR (300 MHz,  $\text{CDCl}_3$ )  $\delta$  7.00 (d, 4H,  $J = 1.9 \text{ Hz}$ ), 6.64 (d, 1H,  $J = 2.2 \text{ Hz}$ ), 6.62 (d, 1H,  $J = 2.2 \text{ Hz}$ ), 5.45 (dd, 2H,  $J = 1.7, 4.2 \text{ Hz}$ ), 5.43 (dd, 2H,  $J = 1.7, 4.2 \text{ Hz}$ ), 3.47 (dd, 4H,  $J = 4.2, 10.7 \text{ Hz}$ ), 3.40 (dd, 4H,  $J = 4.2, 10.7 \text{ Hz}$ ), 1.26 (s, 18H);  $^{13}\text{C}$  NMR (100 MHz,  $\text{CDCl}_3$ )  $\delta$  157.1, 157.1, 120.8, 107.5, 107.4, 97.2, 94.3, 76.7, 32.4, 28.7; HRMS calcd for  $\text{C}_{18}\text{H}_{27}\text{Br}_2\text{IO}_4$   $[\text{M}]^+$  591.9321, found 591.9319.

### 3-(2-Bromoethoxy)-5-iodophenol (**54**).

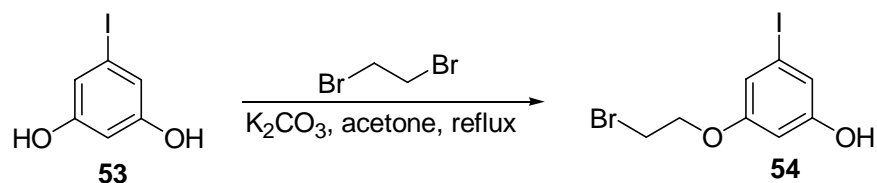

To a solution of **53** (2.75 g, 11.6 mmol, 1 equiv) and 1,2-dibromoethane (7.0 mL, 81.6 mmol, 7 equiv) in acetone (20 mL) was added  $\text{K}_2\text{CO}_3$  (2.10 g, 15.1 mmol, 1.3 equiv). The mixture was stirred at reflux for 24 h. The reaction was cooled to room temperature and filtered through celite. Distillation of excess 1,2-dibromoethane gave a crude oil that was purified by flash chromatography using 10% EtOAc/hexanes as eluant yielding the desired product (1.33 g, 34%) as a white solid, mp = 139-141 °C.  $R_f = 0.39$  on silica gel (25% EtOAc/hexanes). IR (neat)  $\nu = 3385, 1596, 1493, 1279, 1148 \text{ cm}^{-1}$ ;  $^1\text{H}$  NMR (300 MHz,  $\text{CDCl}_3$ )  $\delta$  6.83 (m, 2H), 6.36 (t, 1H,  $J = 2.2 \text{ Hz}$ ), 4.89 (brs, 1OH), 4.21 (t, 2H,  $J = 6.2 \text{ Hz}$ ), 3.59 (t, 2H,  $J = 6.2 \text{ Hz}$ );  $^{13}\text{C}$  NMR (75 MHz,  $\text{CDCl}_3$ )  $\delta$  159.8, 157.2, 118.3, 116.8, 102.6, 94.3, 68.2, 28.9; HRMS calcd for  $\text{C}_8\text{H}_8\text{BrIO}_2$   $[\text{M}]^+$  341.8752, found 341.8752.

**1-(2-Bromoethoxy)-3-(3-bromopropoxy)-5-iodobenzene (18).**

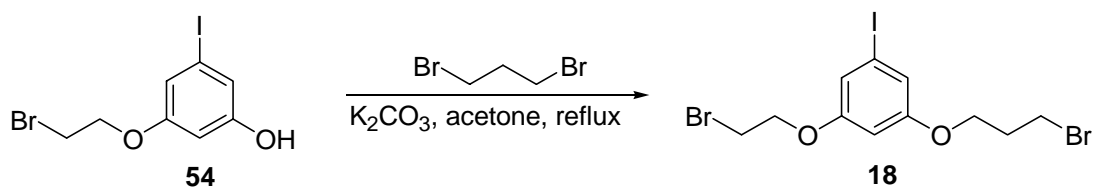

To a solution of **54** (1.88 g, 5.48 mmol, 1 equiv) and 1,2-dibromopropane (5.6 mL, 54.8 mmol, 10 equiv) in acetone (15 mL) was added  $\text{K}_2\text{CO}_3$  (2.27 g, 16.4 mmol, 3 equiv). The mixture was stirred at reflux for 36 h. The reaction was cooled to room temperature and filtered through celite. Distillation of excess 1,2-dibromopropane gave a crude oil that was purified by flash chromatography using 10% EtOAc/hexanes as eluant yielding **18** (1.00 g, 40%) as a white solid, mp = 63-64 °C.  $R_f$  = 0.50 (50%  $\text{CH}_2\text{Cl}_2$ /hexanes). IR (neat)  $\nu$  = 1574, 1434, 1277, 1163  $\text{cm}^{-1}$ ;  $^1\text{H}$  NMR (400 MHz,  $\text{CDCl}_3$ )  $\delta$  6.90 (m, 1H), 6.86 (m, 1H), 6.43 (t, 1H,  $J$  = 2.4 Hz), 4.24 (t, 2H,  $J$  = 6.2 Hz), 4.06 (t, 2H,  $J$  = 6.0 Hz), 3.61 (t, 2H,  $J$  = 2.7 Hz), 3.56 (t, 2H,  $J$  = 6.4 Hz), 2.29 (quint, 2H,  $J$  = 6.0 Hz);  $^{13}\text{C}$  NMR (100 MHz,  $\text{CDCl}_3$ )  $\delta$  160.4, 159.7, 117.4, 116.9, 102.1, 94.3, 68.2, 65.8, 32.3, 29.9, 28.9; HRMS calcd for  $\text{C}_{11}\text{H}_{13}\text{Br}_2\text{IO}_2$   $[\text{M}]^+$  461.8333, found 461.8327.

**1,3-Bis(3-bromopropoxy)-5-iodobenzene (20).**

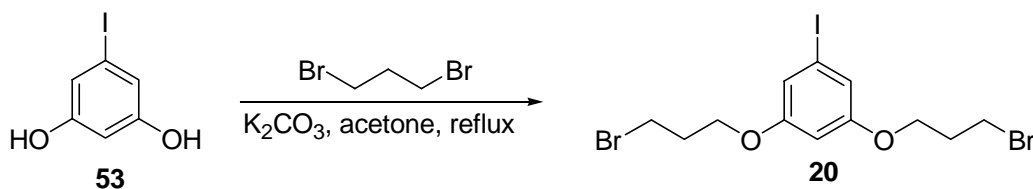

To a solution of **53** (1.24 g, 5.25 mmol, 1 equiv) and 1,2-dibromopropane (5.3 mL, 52.5 mmol, 10 equiv) in acetone (15 mL) was added  $\text{K}_2\text{CO}_3$  (3.63 g, 26.3 mmol, 5 equiv). The mixture was stirred at reflux for 36 h. The reaction was cooled to room temperature and filtered through celite. Distillation of excess 1,2-dibromopropane gave a crude oil that was purified by flash chromatography using 10% EtOAc/hexanes as eluant yielding **20** (1.46 g, 58%) as a white solid,

mp = 62 °C.  $R_f$  = 0.40 (10% EtOAc/hexanes). IR (neat)  $\nu$  = 1593, 1434, 1166, 1053  $\text{cm}^{-1}$ ;  $^1\text{H}$  NMR (300 MHz,  $\text{CDCl}_3$ )  $\delta$  6.87 (d, 2H,  $J$  = 2.2 Hz), 6.42 (t, 1H,  $J$  = 2.2 Hz), 4.06 (t, 4H,  $J$  = 5.8 Hz), 3.58 (t, 4H,  $J$  = 6.4 Hz), 2.29 (quint, 4H,  $J$  = 6.4 Hz);  $^{13}\text{C}$  NMR (75 MHz,  $\text{CDCl}_3$ )  $\delta$  160.3, 116.8, 101.8, 94.3, 65.8, 32.4, 29.9; HRMS calcd for  $\text{C}_{12}\text{H}_{15}\text{Br}_2\text{IO}_2$   $[\text{M}]^+$  475.8477, found 475.8483.

**1,3-Bis(4-bromobutoxy)-5-iodobenzene (23).**

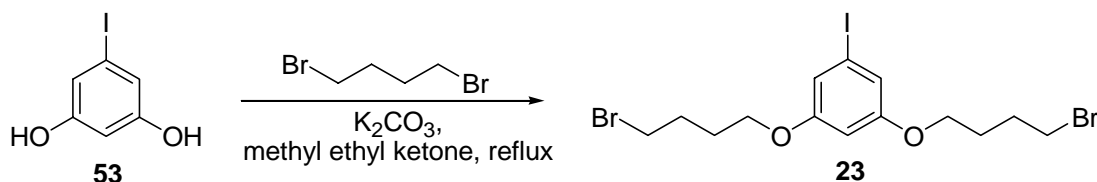

To a solution of **53** (3.5 g, 14.8 mmol, 1 equiv) and 1,4-dibromobutane (27 mL, 222 mmol, 15 equiv) in methyl ethyl ketone (30 mL) was added  $\text{K}_2\text{CO}_3$  (10.3 g, 74.1 mmol, 5 equiv). The mixture was stirred at reflux for 24 h. The reaction was cooled to room temperature and filtered through celite. Distillation of excess 1,4-dibromobutane gave a crude oil that was purified by flash chromatography using 10% EtOAc/hexanes as eluant yielding **23** (3.67 g, 50%) as a white solid, mp = 51-53 °C.  $R_f$  = 0.48 (25% EtOAc/hexanes). IR (neat)  $\nu$  = 1592, 1433, 1168, 1050  $\text{cm}^{-1}$ ;  $^1\text{H}$  NMR (300 MHz,  $\text{CDCl}_3$ )  $\delta$  6.89 (d, 2H,  $J$  = 2.2 Hz), 6.37 (t, 1H,  $J$  = 2.2 Hz), 3.93 (t, 4H,  $J$  = 6.0 Hz), 3.48 (t, 4H,  $J$  = 6.3 Hz), 1.98-2.10 (m, 4H), 1.85-1.97 (m, 4H);  $^{13}\text{C}$  NMR (75 MHz,  $\text{CDCl}_3$ )  $\delta$  160.5, 116.5, 101.6, 94.3, 67.2, 33.6, 29.5, 27.9; HRMS calcd for  $\text{C}_{14}\text{H}_{19}\text{Br}_2\text{IO}_2$   $[\text{M}]^+$  503.8778, found 503.8785.

### 1,3-Bis-bromomethyl-5-iodobenzene (**55**).

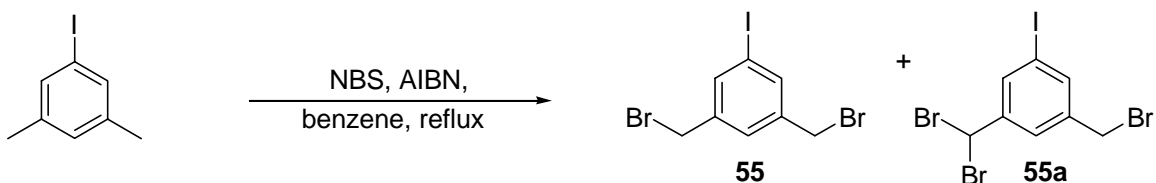

A mixture of 3,5-dimethyliodobenzene (5.00 g, 21.5 mmol, 1 equiv), NBS (8.44 g, 47.4 mmol, 2.2 equiv) and AIBN (0.71 g, 4.3 mmol, 0.2 equiv) was refluxed in benzene (150 mL) for 6 h. The reaction mixture was cooled to room temperature, diluted with ether (150 mL) and washed with water (150 mL). The aqueous layer was extracted with ether (3×) and the combined organic layers were dried with anhydrous  $\text{MgSO}_4$  and filtered. Removal of the solvent gave a crude oil that was purified by flash chromatography using 2-5%  $\text{CH}_2\text{Cl}_2$ /hexanes to afford **55** and **55a** as an inseparable mixture (**55**:**55a** = 3:1, 4.55 g, 54%); white solid, mp = 75-80 °C.  $R_f$  = 0.33 on silica gel (5% ether/hexanes). IR (neat **55/55a**)  $\nu$  = 1640, 1432, 1252, 1208  $\text{cm}^{-1}$ ; **55**:  $^1\text{H}$  NMR (400 MHz,  $\text{CDCl}_3$ )  $\delta$  7.67 (d, 2H,  $J$  = 1.5 Hz), 7.37 (s, 1H), 4.38 (s, 4H);  $^{13}\text{C}$  NMR (100 MHz,  $\text{CDCl}_3$ )  $\delta$  140.4, 138.0, 129.2, 94.5, 31.5; HRMS  $[\text{M}]^+$  not found. **55a**:  $^1\text{H}$  NMR (400 MHz,  $\text{CDCl}_3$ )  $\delta$  7.82 (t, 1H,  $J$  = 1.5 Hz), 7.69 (t, 1H,  $J$  = 1.3 Hz), 7.54 (t, 1H,  $J$  = 1.5 Hz), 6.52 (s, 1H), 4.39 (s, 2H);  $^{13}\text{C}$  NMR (100 MHz,  $\text{CDCl}_3$ )  $\delta$  144.1, 139.3, 135.5, 132.1, 126.7, 94.1, 38.5, 31.1; HRMS calcd for  $\text{C}_8\text{H}_6\text{Br}_3\text{I}$   $[\text{M}]^+$  465.7064, found 465.7071.

### 2-[3-(2-Hydroxy-ethoxymethyl)-5-iodo-benzyloxy]-ethanol (**56**).

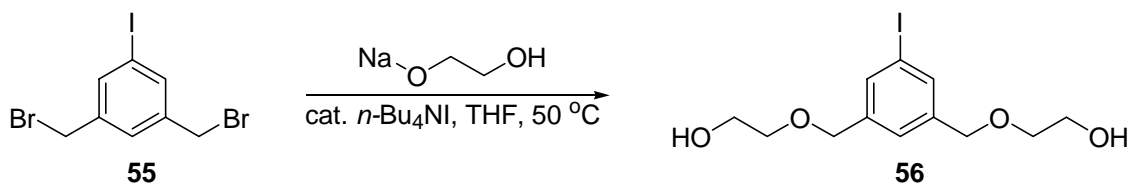

Ethylene glycol (3.0 mL, 54 mmol, 6 equiv) was added to a suspension of sodium hydride (95% dispersion in mineral oil, 0.7 g, 27 mmol, 3 equiv) in THF (75 mL) at 0 °C. The solution was warmed to room temperature and stirred for an additional 30 min. In a separate round-bottom



flask, a catalytic amount of *n*-Bu<sub>4</sub>NI was added to a solution of **55** (3.5 g, 9 mmol, 1 equiv) in THF (100 mL). This solution was cannulated into the solution of sodioethylene glycolate at room temperature. The reaction mixture was heated to 50 °C for 20 h, cooled to room temperature and quenched with saturated aq NH<sub>4</sub>Cl (50 mL). THF was removed under reduced pressure and the aqueous layer was extracted with ether (3×75 mL). The combined organic layers were dried with anhydrous MgSO<sub>4</sub> and filtered. Removal of the solvent afforded a crude oil that was purified by flash chromatography using 2/38/60 – 5/35/60 MeOH/EtOAc/CH<sub>2</sub>Cl<sub>2</sub> yielding **56** (1.85 g, 58%) as a light yellow oil. *R*<sub>f</sub> = 0.31 on silica gel (5/35/60 MeOH/EtOAc/CH<sub>2</sub>Cl<sub>2</sub>). IR (neat)  $\nu$  = 3386, 1602, 1569, 1442, 1352, 1246, 1156, 1118, 1069, 890, 854, 806 cm<sup>-1</sup>; <sup>1</sup>H NMR (300 MHz, CDCl<sub>3</sub>)  $\delta$  7.60 (s, 2H), 7.30 (s, 1H), 4.48 (s, 4H), 3.73 (bs, 4H), 3.57 (t, 4H, *J* = 4.6 Hz), 2.84 (bs, 2H); <sup>13</sup>C NMR (100 MHz, CDCl<sub>3</sub>)  $\delta$  140.7, 136.0, 126.2, 94.6, 72.3, 71.9, 62.0; HRMS calcd for C<sub>12</sub>H<sub>17</sub>IO<sub>4</sub> [M]<sup>+</sup> 352.0172, found 352.0174.

### 1,3-Bis-(2-bromo-ethoxymethyl)-5-iodobenzene (**25**).

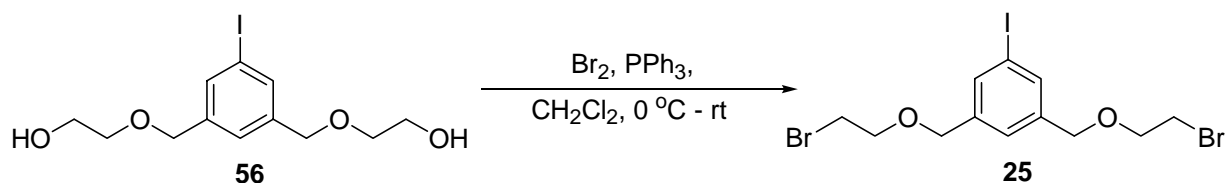

Bromine (0.35 mL, 6.8 mmol, 2.4 equiv) was added slowly to a solution of triphenylphosphine (1.79 g, 6.8 mmol, 2.4 equiv) in CH<sub>2</sub>Cl<sub>2</sub> (15 mL) at 0 °C. The resulting yellow suspension was stirred for an additional 10 min at 0 °C. A solution of **56** (1 g, 2.8 mmol, 1 equiv) and Et<sub>3</sub>N (0.95 mL, 6.8 mmol, 2.4 equiv) in CH<sub>2</sub>Cl<sub>2</sub> (15 mL) was added to the suspension at 0 °C and the resulting yellow solution was stirred at 0 °C for 30 min, then at room temperature for an additional 30 min. The solvent was removed from the reaction mixture and the crude residue was purified by flash chromatography using 50% CH<sub>2</sub>Cl<sub>2</sub>/hexanes to afford **25** (0.96 g, 71%) as a colourless oil. *R*<sub>f</sub> = 0.31 on silica gel (50% CH<sub>2</sub>Cl<sub>2</sub>/hexanes). IR (neat)  $\nu$  = 1644, 1570, 1440,

1355, 1276, 1112, 907, 730  $\text{cm}^{-1}$ ;  $^1\text{H}$  NMR (400 MHz,  $\text{CDCl}_3$ )  $\delta$  7.64 (s, 2H), 7.31 (s, 1H), 4.53 (s, 4H), 3.80 (t, 4H,  $J = 6.1$  Hz), 3.50 (t, 4H,  $J = 6.1$  Hz);  $^{13}\text{C}$  NMR (100 MHz,  $\text{CDCl}_3$ )  $\delta$  140.5, 136.0, 126.1, 94.7, 72.2, 70.4, 30.5; HRMS calcd for  $\text{C}_{12}\text{H}_{15}\text{Br}_2\text{IO}_2$   $[\text{M}]^+$  475.8484, found 475.8494.

**(3-*tert*-Butoxycarbonylmethylsulfanyl-5-iodo-2-methoxy-phenylsulfanyl)-acetic acid *tert*-butyl ester (**57**).**

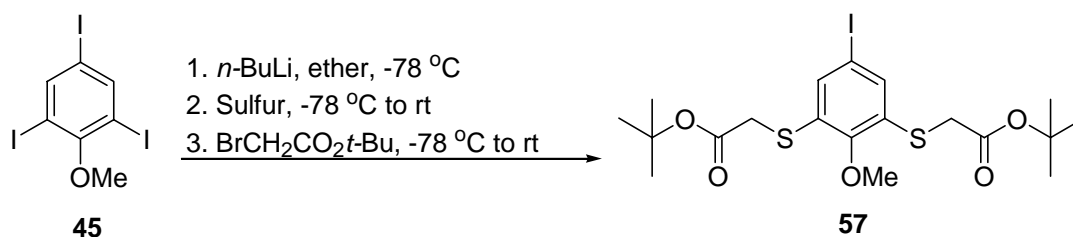

A solution of **45** (10.2 g, 21 mmol, 1 equiv) in ether (200 mL) was cooled to  $-78$  °C. *n*-BuLi (1.6 M solution in hexanes, 29 mL, 46 mmol, 2.2 equiv) was added slowly and the reaction mixture was stirred at  $-78$  °C for 1 hr. Sulfur (1.4 g, 42 mmol 2 equiv) was added in one portion and the reaction mixture was stirred again at  $-78$  °C for 10 min. The mixture was then warmed to room temperature and stirred for an additional 3 h. The reaction mixture was cooled back down to  $-78$  °C and *tert*-butyl bromoacetate (6.2 mL, 42 mmol, 2 equiv) was added. The mixture was stirred at this temperature for 5 minutes, and then warmed back up to room temperature and stirred for an additional hour. The reaction was quenched with saturated aq  $\text{NH}_4\text{Cl}$  (100 mL) and the aqueous layer was extracted with ether ( $3 \times 100$  mL). The combined organic layers were washed with brine (100 mL), dried with anhydrous  $\text{MgSO}_4$ , filtered and concentrated. The crude product was purified by flash chromatography using 5% EtOAc/hexanes as an eluant to afford **57** (5.7 g, 51%) as a yellow oil.  $R_f = 0.2$  (10% EtOAc/hexanes). IR (neat)  $\nu = 1728, 1542, 1453, 1402, 1368, 1294, 1238, 1133, 991, 849$   $\text{cm}^{-1}$ ;  $^1\text{H}$  NMR (300 MHz,  $\text{CDCl}_3$ )  $\delta$  7.42 (s, 2H), 3.89 (s, 3H),

3.56 (s, 4H), 1.44 (s, 18H);  $^{13}\text{C}$  NMR (100 MHz,  $\text{CDCl}_3$ )  $\delta$  168.4, 155.1, 134.9, 132.9, 88.2, 82.6, 60.1, 35.8, 28.1; HRMS calcd for  $\text{C}_{19}\text{H}_{27}\text{IO}_5\text{S}_2\text{Na}$  (ESI) 549.0236, found 549.0232.

**2-[3-(2-Hydroxy-ethylsulfanyl)-5-iodo-2-methoxy-phenylsulfanyl]-ethanol (**58**).**

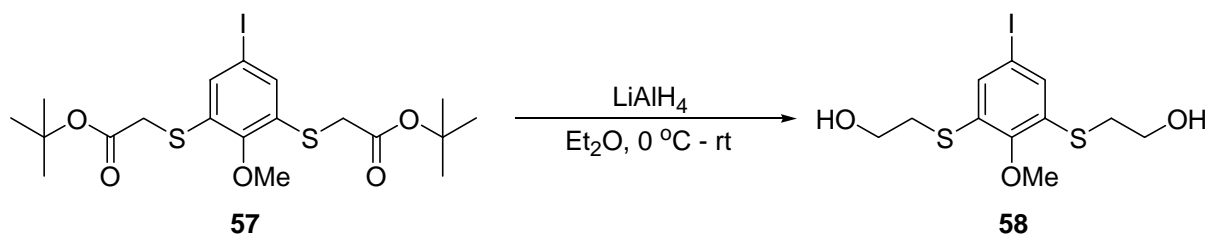

$\text{LiAlH}_4$  (1.02 g, 26.9 mmol, 2.5 equiv) was suspended in ether (20 mL) and cooled to 0 °C. A solution of **57** (5.66 g, 10.8 mmol, 1 equiv) in ether (40 mL) was added to the  $\text{LiAlH}_4$  at 0 °C and the mixture was stirred at this temperature for 30 min, then at room temperature for 1 hour. To work-up the reaction: 1 mL water/g of  $\text{LiAlH}_4$  was slowly added to the reaction mixture and stirred at room temperature for 10 minutes; followed by 1 mL 15% (w/w)  $\text{NaOH}$ /g  $\text{LiAlH}_4$  and stir for 10 minutes; finally 3 mL water/g  $\text{LiAlH}_4$  was added to the reaction mixture for 10 minutes, or until a fluffy white precipitate formed. The precipitate was filtered off and the ether was removed under reduced pressure. Crude product was purified by flash chromatography using 50% - 100% EtOAc/hexanes eluant to afford **58** (3 g, 72%) as a colourless oil.  $R_f$  = 0.17 (25% EtOAc/hexanes). IR (neat)  $\nu$  = 3385, 1538, 1450, 1398, 1234, 1044, 990  $\text{cm}^{-1}$ ;  $^1\text{H}$  NMR (400 MHz,  $\text{CDCl}_3$ )  $\delta$  7.48 (s, 2H), 3.89 (s, 3H), 3.75 (t, 4H,  $J$  = 5.6 Hz), 3.07 (t, 4H,  $J$  = 6.0 Hz), 2.56 (bs, 2H);  $^{13}\text{C}$  NMR (100 MHz,  $\text{CDCl}_3$ )  $\delta$  156.9, 136.7, 132.6, 88.7, 60.7, 60.5, 36.1; HRMS calcd for  $\text{C}_{11}\text{H}_{15}\text{IO}_3\text{S}_2$   $[\text{M}]^+$  385.9507, found 385.9506.

**1,3-Bis-(2-bromo-ethylsulfanyl)-5-iodo-2-methoxy-benzene (29).**

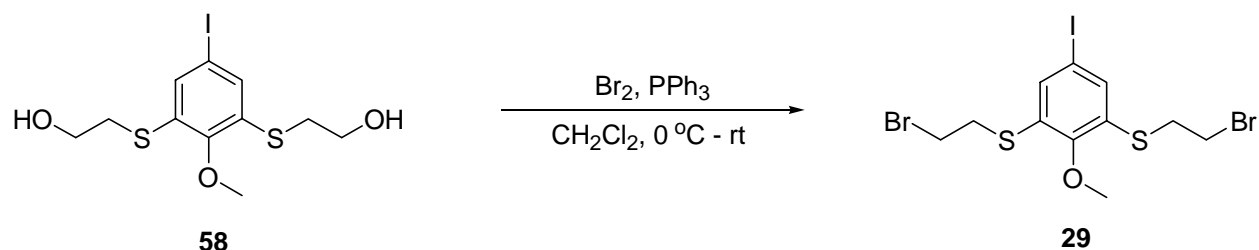

Bromine (0.9 mL, 17.4 mmol, 2.4 equiv) was added slowly to a solution of triphenylphosphine (4.56 g, 17.4 mmol, 2.4 equiv) in  $\text{CH}_2\text{Cl}_2$  (45 mL) at  $0\text{ }^\circ\text{C}$ . The resulting yellow suspension was stirred for an additional 10 min at  $0\text{ }^\circ\text{C}$ . A solution of **58** (2.8 g, 7.3 mmol, 1 equiv) and  $\text{Et}_3\text{N}$  (2.4 mL, 17.4 mmol, 2.4 equiv) in  $\text{CH}_2\text{Cl}_2$  (45 mL) was added to the suspension at  $0\text{ }^\circ\text{C}$  and the resulting yellow solution was stirred at  $0\text{ }^\circ\text{C}$  for 30 min, then at room temperature for an additional 30 min. The solvent was removed from the reaction mixture and the crude residue was purified by flash chromatography using 2 to 5%  $\text{Et}_2\text{O}$ /hexanes to afford **29** (1.52 g, 41%) as a colourless oil.  $R_f = 0.18$  on silica gel (2%  $\text{Et}_2\text{O}$ /hexanes). IR (neat)  $\nu = 1587, 1534, 1447, 1388, 1222, 1185, 1097, 986\text{ cm}^{-1}$ ;  $^1\text{H}$  NMR (400 MHz,  $\text{CDCl}_3$ )  $\delta$  7.44 (s, 2H), 3.87 (s, 3H), 3.51-3.29 (m, 8H);  $^{13}\text{C}$  NMR (100 MHz,  $\text{CDCl}_3$ )  $\delta$  156.7, 136.5, 132.2, 88.6, 60.3, 34.5, 29.6; HRMS calcd for  $\text{C}_{11}\text{H}_{13}\text{Br}_2\text{IOS}_2$   $[\text{M}]^+$  509.7819, found 509.7821.

**1,3-Bis-[(chloromethyl-dimethyl-silanyl)-methoxy]-5-iodo-benzene (59)**

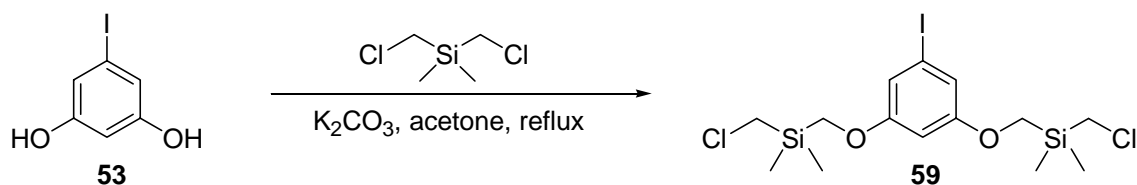

A solution of **53** (1 g, 4.2 mmol, 1 equiv) and  $\text{K}_2\text{CO}_3$  (1.76 g, 12.7 mmol, 3 equiv) was stirred in acetone (45 mL) for 30 min at room temperature. Bis(chloromethyl)dimethylsilane (5.4 mL, 37.3 mmol, 9 equiv) and a catalytic amount of  $n\text{-Bu}_4\text{NI}$  (155 mg, 0.4 mmol, 0.1 equiv) were added to

this solution and the reaction mixture was heated to 65 °C for 20 h. The acetone was removed under reduced pressure and the residue was partitioned between water and Et<sub>2</sub>O (50 mL each). The aqueous layer was extracted with Et<sub>2</sub>O (3× 50 mL) and the combined organic layers were washed with brine (50 mL), dried with anhydrous MgSO<sub>4</sub>, filtered and concentrated. The crude product was purified by flash chromatography using 0 – 5% EtOAc/hexanes eluant to afford **59** (1.43 g, 71%) as a colourless oil. *R*<sub>f</sub> = 0.84 on silica gel (10% EtOAc/hexanes). IR (neat)  $\nu$  = 1590, 1569, 1420, 1252, 1153, 1047, 1014, 847 cm<sup>-1</sup>; <sup>1</sup>H NMR (400 MHz, CDCl<sub>3</sub>)  $\delta$  6.90 (d, 2H, *J* = 2.2 Hz), 6.50 (t, 1H, *J* = 2.2 Hz), 3.67 (s, 4H), 2.92 (s, 4H), 0.26 (s, 12H); <sup>13</sup>C NMR (100 MHz, CDCl<sub>3</sub>)  $\delta$  162.8, 116.2, 100.9, 94.1, 58.9, 28.5, -5.8; HRMS calcd for C<sub>14</sub>H<sub>23</sub>Cl<sub>2</sub>IO<sub>2</sub>Si<sub>2</sub> [M]<sup>+</sup> 475.9658, found 475.9650.

#### 1-Iodo-3,5-bis-[(iodomethyl-dimethyl-silanyl)-methoxy]-benzene (**33**)

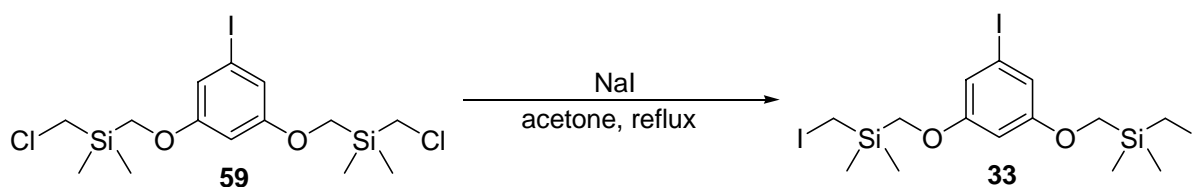

Sodium iodide (3.96 g, 26 mmol, 10 equiv) was added to a solution of **59** (1.26 g, 2.6 mmol, 1 equiv) in acetone (30 mL). The reaction mixture was heated to 65 °C for 6 h, during which time a white precipitate had formed. The solvent was removed under reduced pressure and the residue was partitioned between water and Et<sub>2</sub>O (50 mL each). The aqueous layer was extracted with Et<sub>2</sub>O (3× 50 mL) and the combined organic layers were washed with brine (50 mL), dried with anhydrous MgSO<sub>4</sub>, filtered and concentrated. The crude product was purified by flash chromatography using 0 – 4% EtOAc/hexanes eluant to afford **33** (1.51 g, 87%) as a yellow oil. *R*<sub>f</sub> = 0.43 on silica gel (2% Et<sub>2</sub>O/hexanes). IR (neat)  $\nu$  = 1589, 1568, 1418, 1251, 1153, 1047, 1009, 842 cm<sup>-1</sup>; <sup>1</sup>H NMR (400 MHz, CDCl<sub>3</sub>)  $\delta$  6.90 (d, 2H, *J* = 2.2 Hz), 6.50 (t, 1H, *J* = 2.2 Hz),

3.67 (s, 4H), 2.12 (s, 4H), 0.28 (s, 12H);  $^{13}\text{C}$  NMR (100 MHz,  $\text{CDCl}_3$ )  $\delta$  162.9, 116.2, 100.9, 94.1, 59.9, -4.20, -16.4; HRMS calcd for  $\text{C}_{14}\text{H}_{23}\text{I}_3\text{O}_2\text{Si}_2$   $[\text{M}]^+$  659.8371, found 659.8372.

***N*-(3-Iodo-5-[[*(4-methylphenyl)sulfonyl*]amino}phenyl)-4-methylbenzenesulfonamide (61).**

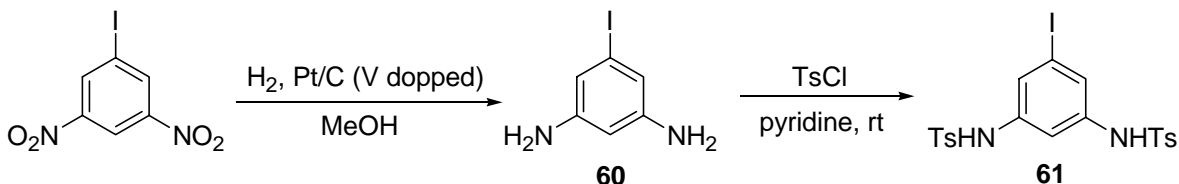

To a solution of 1-iodo-3,5-dinitrobenzene (2.9 g, 9.9 mmol, 1 equiv) in MeOH (100 mL) was added 1% platinum on activated carbon (vanadium doped) (200 mg). The reaction mixture was placed under an atmosphere of hydrogen (30 psi) for 12 hr. The reaction mixture was filtered over Celite<sup>®</sup> and concentrated to afford crude **60** as brown solid, which was used without further purification. To a solution of **60** in pyridine (15 mL) was added *p*-toluenesulfonyl chloride (4.2 g, 21.8 mmol, 2.2 equiv). The reaction mixture was stirred at room temperature for 1 hr and then quenched with water (20 mL). The solution was extracted with  $\text{CH}_2\text{Cl}_2$  ( $3 \times 20$  mL) and the combined organic extracts were washed with aqueous  $\text{CuSO}_4$  ( $2 \times 20$  mL), dried with anhydrous  $\text{MgSO}_4$ , filtered and concentrated. The crude product was purified by flash chromatography using 25% EtOAc/ $\text{CH}_2\text{Cl}_2$  eluant to afford **61** (3.9 g, 72%); tan solid, mp = 230 °C (decomposed).  $R_f$  = 0.34 on silica gel (25% EtOAc/ $\text{CH}_2\text{Cl}_2$ ). IR (Nujol)  $\nu$  = 3251, 3221, 1601, 1581, 1462, 1377, 1156  $\text{cm}^{-1}$ ;  $^1\text{H}$  NMR (400 MHz, DMSO)  $\delta$  10.41 (s, 1H), 7.59 (d, 4H,  $J$  = 8.2 Hz), 7.35 (d, 4H,  $J$  = 8.2 Hz), 7.16 (t, 1H,  $J$  = 1.9 Hz), 6.97 (d, 2H,  $J$  = 1.9 Hz), 2.36 (s, 6H);  $^{13}\text{C}$  NMR (100 MHz, DMSO)  $\delta$  143.5, 139.8, 136.1, 129.6, 126.6, 122.1, 108.2, 94.7, 20.9; HRMS calcd for  $\text{C}_{20}\text{H}_{19}\text{N}_2\text{O}_4\text{NaS}_2\text{I}$  (ESI) 564.9723, found 564.9735. Data for **60**: Brown solid, mp = 128-130 °C.  $R_f$  = 0.58 on silica gel (EtOAc). IR (neat)  $\nu$  = 3433, 3304, 3195, 1565, 977, 800  $\text{cm}^{-1}$ ;  $^1\text{H}$  NMR (400 MHz,  $\text{CDCl}_3$ )  $\delta$  6.46 (d, 2H,  $J$  = 2.0 Hz), 5.93 (t, 1H,  $J$  = 2.0 Hz), 3.55 (bs, 4H);  $^{13}\text{C}$  NMR

(100 MHz, CDCl<sub>3</sub>)  $\delta$  148.7, 115.0, 101.1, 95.7; HRMS calcd for C<sub>6</sub>H<sub>8</sub>N<sub>2</sub>I (ESI) 234.9726, found 234.9738.

***N,N'*-Bis(2-Bromomethyl)-5-iodobenzene-1,3-di-*p*-toluylsulfonamide (**35**).**

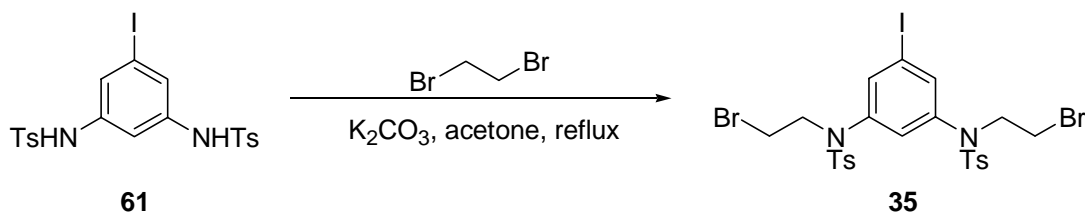

To a suspension of **61** (2 g, 3.7 mmol, 1 equiv) in acetonitrile (35 mL) was added 1,2-dibromoethane (4.8 mL, 55.3 mmol, 15 equiv) and K<sub>2</sub>CO<sub>3</sub> (1.53 g, 11.1 mmol, 3 equiv). The suspension was heated to reflux and stirred at this temperature for 8 hr. The reaction was then quenched with water (20 mL) and extracted with Et<sub>2</sub>O (3 × 20 mL). The combined organic layers were dried over MgSO<sub>4</sub>, filtered and concentrated. The crude product was purified by flash chromatography using 25% EtOAc/hexanes eluant to afford **35** (2.3 g, 83%); white solid, mp = 117-118 °C. *R*<sub>f</sub> = 0.47 on silica gel (25% EtOAc). IR (neat)  $\nu$  = 3441, 1645, 1350, 1160 cm<sup>-1</sup>; <sup>1</sup>H NMR (400 MHz, CDCl<sub>3</sub>)  $\delta$  7.45 (d, 4H, *J* = 8.2 Hz), 7.42 (d, 2H, *J* = 1.9 Hz), 7.30 (d, 4H, *J* = 8.2 Hz), 6.71 (t, 1H, *J* = 1.9 Hz), 3.76 (t, 4H, *J* = 7.0 Hz), 3.33 (t, 4H, *J* = 7.0 Hz), 2.44 (s, 6H); <sup>13</sup>C NMR (100 MHz, CDCl<sub>3</sub>)  $\delta$  144.7, 141.0, 138.1, 134.5, 130.1, 128.8, 127.8, 93.3, 52.4, 29.0, 21.8; HRMS calcd for C<sub>24</sub>H<sub>25</sub>Br<sub>2</sub>IN<sub>2</sub>NaO<sub>4</sub>S<sub>2</sub> [M]<sup>+</sup> 776.8559 (ESI), found 776.8539.

### Alkylation/Alkenylation Reactions

#### 3-(2,3,5,6-Tetrahydro-benzo[1,2-*b*;5,4-*b'*]difuran-4-yl)-acrylic acid methyl ester (**6**).

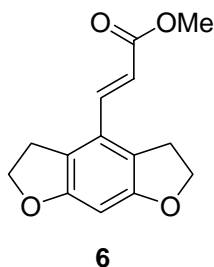

Following the general procedure for the alkylation/alkenylation reaction using **5** and methyl acrylate, and purification by flash chromatography using 10% EtOAc/hexanes as eluant resulted in **6** (32 mg, 80%) as a yellow solid, mp = 157-158 °C (the resulting solid from the evaporation of 10% EtOAc/hexanes).  $R_f$  = 0.40 on silica gel (10% EtOAc/hexanes). IR (neat) 1716, 1635, 1452, 1294, 1182  $\text{cm}^{-1}$ ;  $^1\text{H}$  NMR (400 MHz,  $\text{CDCl}_3$ )  $\delta$  7.66 (d, 1H,  $J$  = 16.3 Hz), 6.34 (s, 1H), 6.25 (d, 1H,  $J$  = 16.3 Hz), 4.62 (t, 4H,  $J$  = 8.6 Hz), 3.81 (s, 3H), 3.25 (t, 4H,  $J$  = 8.6 Hz);  $^{13}\text{C}$  NMR (100 MHz,  $\text{CDCl}_3$ )  $\delta$  167.6, 161.1, 141.6, 127.1, 121.0, 118.5, 94.6, 72.2, 52.0, 29.7; HRMS calcd for  $\text{C}_{14}\text{H}_{14}\text{O}_4$   $[\text{M}]^+$  246.0898, found 246.0892.

#### 3-(2,3,5,6-Tetrahydro-benzo[1,2-*b*;5,4-*b'*]difuran-4-yl)-acrylic acid *tert*-butyl ester (**7**).

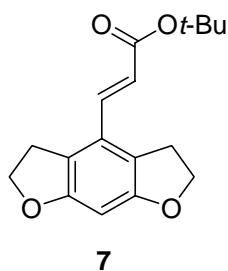

Following the general procedure for the alkylation/alkenylation reaction using **5** and *tert*-butyl acrylate, and purification by flash chromatography using 10% EtOAc/hexanes as eluant resulted in **7** (49 mg, 85%) as a pale yellow solid, mp = 108-109 °C (the resulting solid from the evaporation of 10% EtOAc/hexanes).  $R_f$  = 0.35 on silica gel (10% EtOAc/hexanes). IR (neat) 1707, 1593, 1440, 1293, 1154  $\text{cm}^{-1}$ ;  $^1\text{H}$  NMR (300 MHz,  $\text{CDCl}_3$ )  $\delta$  7.66 (d, 1H,  $J$  = 16.3 Hz),



6.32 (s, 1H), 6.17 (d, 1H,  $J = 16.3$  Hz), 4.61 (t, 4H,  $J = 8.6$  Hz), 3.25 (t, 4H,  $J = 8.6$  Hz), 1.53 (s, 9H);  $^{13}\text{C}$  NMR (75 MHz,  $\text{CDCl}_3$ )  $\delta$  166.6, 160.9, 140.4, 127.3, 123.2, 118.4, 94.3, 81.0, 72.2, 29.6, 28.4; HRMS calcd for  $\text{C}_{17}\text{H}_{20}\text{O}_4$   $[\text{M}]^+$  288.1363, found 288.1361.

**3-(2,3,5,6-Tetrahydro-benzo[1,2-*b*;5,4-*b'*]difuran-4-yl)-acrylic acid benzyl ester (8).**

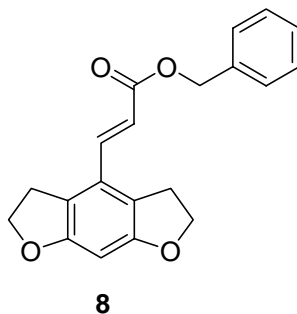

Following the general procedure for the alkylation/alkenylation reaction using **5** and benzyl acrylate, and purification by flash chromatography using 10% EtOAc/hexanes as eluant resulted in **8** (47 mg, 77%) as a pale yellow solid, mp = 68-70 °C (the resulting solid from the evaporation of 10% EtOAc/hexanes).  $R_f = 0.55$  on silica gel (10% EtOAc/hexanes). IR (neat) 2959, 1712, 1633, 1592, 1439, 1289  $\text{cm}^{-1}$ ;  $^1\text{H}$  NMR (300 MHz,  $\text{CDCl}_3$ )  $\delta$  7.69 (d, 1H,  $J = 16.3$  Hz), 7.40 (m, 5H), 6.33 (s, 1H), 6.27 (d, 1H,  $J = 16.3$  Hz), 5.25 (s, 2H), 4.60 (t, 4H,  $J = 8.5$  Hz), 3.24 (t, 4H,  $J = 8.6$  Hz);  $^{13}\text{C}$  NMR (75 MHz,  $\text{CDCl}_3$ )  $\delta$  166.8, 160.8, 141.7, 135.9, 128.6, 128.4, 128.3, 126.8, 120.7, 118.3, 94.4, 66.5, 29.5; HRMS calcd for  $\text{C}_{20}\text{H}_{18}\text{O}_4$   $[\text{M}]^+$  322.1198, found 322.1205.

**2-Methyl-3-(2,3,5,6-tetrahydro-benzo[1,2-*b*;5,4-*b'*]difuran-4-yl)-acrylic acid *tert*-butyl ester (9a) and 2-(2,3,5,6-Tetrahydro-benzo[1,2-*b*;5,4-*b'*]difuran-4-ylmethyl)-acrylic acid *tert*-butyl ester (9b).**

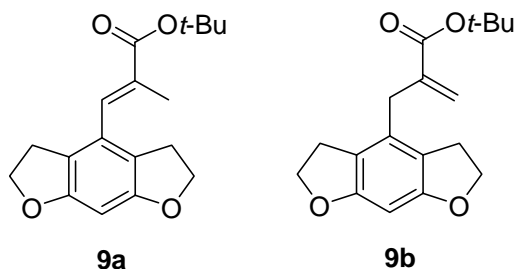

Following the general procedure for the alkylation/alkenylation reaction using **5** and *tert*-butyl methacrylate, and purification by flash chromatography using 5% EtOAc/hexanes as eluant resulted in an inseparable mixture of **9a** and **9b** in a 1:1 ratio (**9a:9b**) (34 mg, 57%) as a white solid, mp = 75-77 °C (the resulting solid from the evaporation of 5% EtOAc/hexanes).  $R_f$  = 0.33 on silica gel (5% EtOAc/hexanes). IR (neat) 2973, 1707, 1596, 1444  $\text{cm}^{-1}$ ;  $^1\text{H}$  NMR (300 MHz,  $\text{CDCl}_3$ )  $\delta$  7.42 (s, 1H in **9a**), 6.27 (s, 1H in **9b**), 6.21 (s, 1H in **9a**), 6.09 (s, 1H in **9b**), 5.17 (s, 1H in **9b**), 4.57 (t, 4H,  $J$  = 8.5 Hz), 4.55 (t, 4H,  $J$  = 8.7 Hz), 3.44 (s, 2H in **9b**), 2.99 (t, 4H,  $J$  = 8.5 Hz), 2.95 (t, 4H,  $J$  = 8.5 Hz), 1.80 (brs, 2H in **9a**), 1.54 (s, 9H), 1.50 (s, 9H);  $^{13}\text{C}$  NMR (75 MHz,  $\text{CDCl}_3$ )  $\delta$  167.3, 166.5, 160.5, 160.4, 139.0, 135.0, 132.5, 131.0, 130.0, 124.3, 118.0, 117.0, 92.3, 91.2, 81.1, 80.9, 72.3, 72.1, 33.4, 29.0, 28.3, 28.2, 27.8, 14.9 HRMS calcd for  $\text{C}_{18}\text{H}_{22}\text{O}_4$   $[\text{M}]^+$  302.1519, found 302.1518.

***N*-tert-Butyl-3-(2,3,5,6-tetrahydro-benzo[1,2-*b*;5,4-*b'*]difuran-4-yl)-acrylamide (10).**

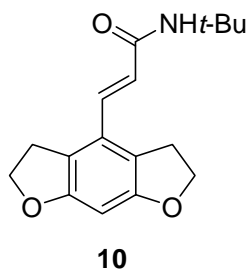

Following the general procedure for the alkylation/alkenylation reaction using **5** and *N*-tert-butylacrylamide, and purification by flash chromatography using 25% EtOAc/hexanes as eluant resulted in **10** (35 mg, 61%) as a white solid, mp = 83-84 °C (the resulting solid from the evaporation of 25% EtOAc/hexanes).  $R_f$  = 0.14 (25% EtOAc/hexanes). IR (neat) 1619, 1450, 1298, 1062  $\text{cm}^{-1}$ ;  $^1\text{H}$  NMR (300 MHz,  $\text{CDCl}_3$ )  $\delta$  7.42 (d, 1H,  $J$  = 15.8 Hz), 6.30 (s, 1H), 6.13 (d, 1H,  $J$  = 15.8 Hz), 5.51 (brs, 1H), 4.59 (t, 4H,  $J$  = 8.6 Hz), 3.23 (t, 4H,  $J$  = 8.6 Hz), 1.44 (s, 9H);  $^{13}\text{C}$  NMR (100 MHz,  $\text{CDCl}_3$ )  $\delta$  165.3, 160.9, 137.2, 127.6, 124.8, 118.1, 93.9, 72.2, 51.9, 29.7, 29.1; HRMS calcd for  $\text{C}_{17}\text{H}_{21}\text{NO}_3$   $[\text{M}]^+$  287.1528, found 287.1521.

**3-(2,3,5,6-Tetrahydro-benzo[1,2-*b*;5,4-*b'*]difuran-4-yl)-acrylonitrile (11).**

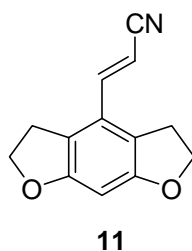

Following the general procedure for the alkylation/alkenylation reaction using **5** and acrylonitrile, and purification by flash chromatography using 10% EtOAc/hexanes as eluant resulted in **11** (30 mg, 71%) as a white solid, mp = 200-201 °C (the resulting solid from the evaporation of 10% EtOAc/hexanes).  $R_f$  = 0.23 (10% EtOAc/hexanes). IR (neat) 2910, 2211, 1738, 1592, 1442  $\text{cm}^{-1}$ ;  $^1\text{H}$  NMR (300 MHz,  $\text{CDCl}_3$ )  $\delta$  7.36 (d, 1H,  $J$  = 16.8 Hz), 6.36 (s, 1H), 5.69 (d, 1H,  $J$  = 16.8 Hz), 4.63 (t, 4H,  $J$  = 8.6 Hz), 3.20 (t, 4H,  $J$  = 8.6 Hz);  $^{13}\text{C}$  NMR (100 MHz,  $\text{CDCl}_3$ )  $\delta$  161.3, 147.7,

126.3, 118.4, 118.1, 99.5, 95.4, 72.2, 29.5; HRMS calcd for  $C_{13}H_{11}NO_2$   $[M]^+$  213.0785, found 213.0789.

**4-(2-Benzenesulfonyl-vinyl)-2,3,5,6-tetrahydro-benzo[1,2-*b*;5,4-*b'*]difuran (12).**

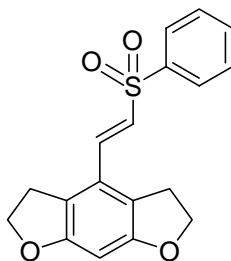

**12**

Following the general procedure for the alkylation/alkenylation reaction using **5** and phenyl vinyl sulfone, and purification by flash chromatography using 25% EtOAc/hexanes as eluant resulted in **12** (24 mg, 38%) as a yellow solid, mp = 153-155 °C (the resulting solid from the evaporation of 25% EtOAc/hexanes).  $R_f$  = 0.31 on silica gel (25% EtOAc/hexanes). IR (neat) 1586, 1444, 1302, 1143  $cm^{-1}$ ;  $^1H$  NMR (300 MHz,  $CDCl_3$ )  $\delta$  7.94 (d, 2H,  $J$  = 7.0 Hz), 7.58 (m, 4H), 6.67 (d, 1H,  $J$  = 15.7 Hz), 6.35 (s, 1H), 4.61 (t, 4H,  $J$  = 8.6 Hz), 3.21 (t, 4H,  $J$  = 8.6 Hz);  $^{13}C$  NMR (75 MHz,  $CDCl_3$ )  $\delta$  161.2, 140.8, 139.1, 133.7, 130.1, 129.6, 127.8, 125.0, 118.9, 95.5, 72.2, 29.6; HRMS calcd for  $C_{18}H_{16}O_4S$   $[M]^+$  328.0757, found 328.0769.

**4-(2-Benzenesulfinyl-vinyl)-2,3,5,6-tetrahydro-benzo[1,2-*b*;5,4-*b'*]difuran (13).**

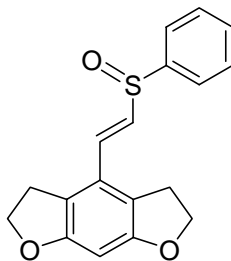

**13**

Following the general procedure for the alkylation/alkenylation reaction using **5** and phenyl vinyl sulfoxide, and purification by flash chromatography using 25% EtOAc/hexanes as eluant resulted

in **13** (23 mg, 37%) as a yellow solid, mp = 150-151 °C (the resulting solid from the evaporation of 25% EtOAc/hexanes).  $R_f$  = 0.31 on silica gel (25% EtOAc/hexanes). IR (neat) 2897, 1586, 1441, 1304, 1155, 1062  $\text{cm}^{-1}$ ;  $^1\text{H}$  NMR (300 MHz,  $\text{CDCl}_3$ )  $\delta$  7.68 (m, 2H), 7.54 (m, 3H), 7.33 (d, 1H,  $J$  = 15.8 Hz), 6.67 (d, 1H,  $J$  = 15.8 Hz), 6.31 (s, 1H), 4.59 (t, 4H,  $J$  = 8.5 Hz), 3.19 (t, 4H,  $J$  = 8.5 Hz);  $^{13}\text{C}$  NMR (75 MHz,  $\text{CDCl}_3$ )  $\delta$  161.0, 144.0, 136.2, 132.6, 131.5, 129.7, 126.2, 125.0, 117.9, 94.2, 72.1, 29.5; HRMS calcd for  $\text{C}_{18}\text{H}_{16}\text{O}_3\text{S}$   $[\text{M}]^+$  312.0828, found 312.0820.

**2-[2-(2,3,5,6-Tetrahydro-benzo[1,2-*b*;5,4-*b'*]difuran-4-yl)-vinyl]-pyridine (**14**).**

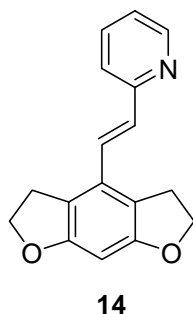

Following the general procedure for the alkylation/alkenylation reaction using **5** and 2-vinyl pyridine, and purification by flash chromatography using 50% EtOAc/hexanes as eluant resulted in **14** (30 mg, 57%) as a yellow solid, mp = 97-98 °C (the resulting solid from the evaporation of 50% EtOAc/hexanes).  $R_f$  = 0.37 on silica gel (25% EtOAc/hexanes). IR (neat) 2917, 1592, 1439, 1156, 1061  $\text{cm}^{-1}$ ;  $^1\text{H}$  NMR (400 MHz,  $\text{CDCl}_3$ )  $\delta$  8.62 (brs, 1H), 7.67 (t, 1H,  $J$  = 7.6 Hz), 7.59 (d, 1H,  $J$  = 16.2 Hz), 7.37 (brd, 1H,  $J$  = 7.2 Hz), 7.17 (m, 1H), 7.00 (d, 1H,  $J$  = 16.3 Hz), 6.29 (s, 1H), 4.62 (t, 4H,  $J$  = 8.6 Hz), 3.34 (t, 4H,  $J$  = 8.6 Hz);  $^{13}\text{C}$  NMR (100 MHz,  $\text{CDCl}_3$ )  $\delta$  160.9, 155.8, 149.9, 136.8, 131.62, 129.9, 129.4, 122.5, 122.6, 117.2, 92.9, 72.2, 29.9; HRMS calcd for  $\text{C}_{17}\text{H}_{17}\text{NO}_2$   $[\text{M}]^+$  265.1103, found 265.1107.

**4-[2-(2,3,5,6-Tetrahydro-benzo[1,2-*b*;5,4-*b'*]difuran-4-yl)-vinyl]-pyridine (**15**).**

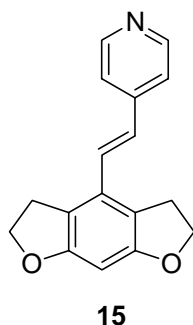

Following the general procedure for the alkylation/alkenylation reaction using **5** and 4-vinyl pyridine, and purification by flash chromatography using 50% EtOAc/hexanes as eluant resulted in **15** (23 mg, 43%) as a yellow solid, mp = 136-137 °C (the resulting solid from the evaporation of 50% EtOAc/hexanes).  $R_f$  = 0.22 on silica gel (50% EtOAc/hexanes). IR (neat) 2921, 1593, 1439, 1061  $\text{cm}^{-1}$ ;  $^1\text{H}$  NMR (300 MHz,  $\text{CDCl}_3$ )  $\delta$  8.60 (brs, 2H), 7.34 (d, 2H,  $J$  = 5.2 Hz), 7.23 (d, 1H,  $J$  = 16.7 Hz), 6.83 (d, 1H,  $J$  = 16.8 Hz), 6.31 (s, 1H), 4.64 (t, 4H,  $J$  = 8.5 Hz), 3.30 (t, 4H,  $J$  = 8.5 Hz);  $^{13}\text{C}$  NMR (75 MHz,  $\text{CDCl}_3$ )  $\delta$  161.0, 150.5, 144.9, 130.4, 129.6, 128.8, 121.1, 117.1, 93.3, 72.2, 29.7; HRMS calcd for  $\text{C}_{17}\text{H}_{17}\text{NO}_2$   $[\text{M}]^+$  265.1102, found 265.1099.

**3-(2,6-Di-*tert*-butoxy-2,3,5,6-tetrahydro-benzo[1,2-*b*;5,4-*b'*]difuran-4-yl)-acrylic acid *tert*-butyl ester (**17**).**

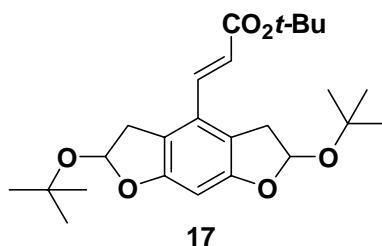

Following the general procedure for the alkylation/alkenylation reaction using **16** and *tert*-butyl acrylate, followed by purification by flash chromatography using 5-10%  $\text{Et}_2\text{O}$ /hexanes as eluant resulted **17** (45 mg, 52%) as a colourless oil, 1:1 mixture of diastereomers.  $R_f$  = 0.1 on silica gel (5%  $\text{Et}_2\text{O}$ /hexanes). IR (neat)  $\nu$  = 1707, 1635, 1595, 1452, 1392, 1367, 1293, 1151, 1096, 1050,

948, 928  $\text{cm}^{-1}$ ;  $^1\text{H}$  NMR (400 MHz,  $\text{CDCl}_3$ )  $\delta$  7.52 (d, 1H,  $J = 16.3$  Hz), 7.51 (d, 1H,  $J = 16.3$  Hz), 6.35 (s, 1H), 6.34 (s, 1H), 6.12 (d, 1H,  $J = 16.3$  Hz), 6.12 (d, 1H,  $J = 16.3$  Hz), 6.02 (dt, 4H,  $J = 2.3$  and 6.5 Hz), 3.37 (dd, 2H,  $J = 2.9$  and 6.9 Hz), 3.33 (dd, 2H,  $J = 2.9$  and 6.9 Hz), 3.06 (dd, 2H,  $J = 2.5$  Hz), 3.02 (dd, 2H,  $J = 2.5$  Hz), 1.52 (s, 18H), 1.31 (s, 18H), 1.30 (s, 18H);  $^{13}\text{C}$  NMR (100 MHz,  $\text{CDCl}_3$ )  $\delta$  166.6, 158.8, 158.8, 140.4, 127.0, 123.0, 117.2, 117.1, 102.2, 102.1, 94.9, 80.8, 75.7, 75.7, 37.7, 29.0, 28.4; HRMS calcd for  $\text{C}_{25}\text{H}_{36}\text{O}_6$   $[\text{M}]^+$  432.2512, found 432.2500.

***tert*-Butyl (2*E*)-3-(2,3,6,7-tetrahydro-5*H*-furo[3,2-*g*]chromen-4-yl)acrylate (**19**).**

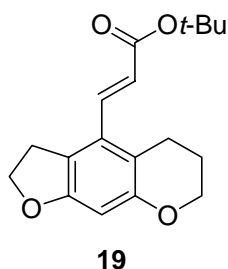

Following the general procedure for the alkylation/alkenylation reaction (irradiated for 10 min instead of 5 min) using **18** and *tert*-butyl acrylate, and purification by flash chromatography using 10% EtOAc/hexanes as eluant resulted in **19** (45 mg, 80%) as a white solid, mp = 103-104  $^{\circ}\text{C}$  (the resulting solid from the evaporation of 10% EtOAc/hexanes).  $R_f = 0.46$  on silica gel (10% EtOAc/hexanes). IR (neat) 2976, 1713, 1604, 1456, 1367, 1119  $\text{cm}^{-1}$ ;  $^1\text{H}$  NMR (300 MHz,  $\text{CDCl}_3$ )  $\delta$  7.73 (d, 1H,  $J = 16.2$  Hz), 6.33 (s, 1H), 6.17 (d, 1H,  $J = 16.2$  Hz), 4.55 (t, 2H,  $J = 8.6$  Hz), 4.12 (t, 2H,  $J = 5.5$  Hz), 3.25 (t, 2H,  $J = 8.6$  Hz), 2.77 (t, 2H,  $J = 6.4$  Hz), 2.00 (quintet, 2H,  $J = 6.1$  Hz), 1.53 (s, 9H);  $^{13}\text{C}$  NMR (75 MHz,  $\text{CDCl}_3$ )  $\delta$  166.4, 159.2, 155.3, 140.1, 130.5, 124.0, 118.5, 113.4, 99.7, 80.7, 71.4, 66.0, 30.4, 28.2, 22.9, 22.4; HRMS calcd for  $\text{C}_{18}\text{H}_{22}\text{O}_4$   $[\text{M}]^+$  302.1522, found 302.1518.

**3-(3,4,7,8-Tetrahydro-2H,6H-pyrano[3,2-g]chromen-5-yl)-acrylic acid methyl ester (21).**

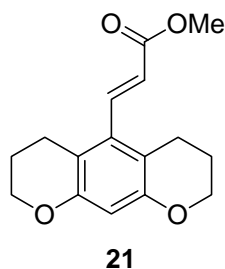

Following the general procedure for the alkylation/alkenylation reaction (irradiated for 10 min instead of 5 min) using **20** and methyl acrylate, and purification by flash chromatography using 10% EtOAc/hexanes as eluant resulted in **21** (36 mg, 67%) as a white solid, mp = 102-103 °C (the resulting solid from the evaporation of 10% EtOAc/hexanes).  $R_f$  = 0.43 on silica gel (10% EtOAc/hexanes). IR (neat) 2948, 1719, 1602, 1461, 1295, 1138  $\text{cm}^{-1}$ ;  $^1\text{H}$  NMR (400 MHz,  $\text{CDCl}_3$ )  $\delta$  7.68 (d, 1H,  $J$  = 16.5 Hz), 6.32 (s, 1H), 6.05 (d, 1H,  $J$  = 16.5 Hz), 4.12 (t, 4H,  $J$  = 5.3 Hz), 3.81 (s, 3H), 2.66 (t, 4H,  $J$  = 6.4 Hz), 1.95 (quintet, 4H,  $J$  = 5.3 Hz);  $^{13}\text{C}$  NMR (100 MHz,  $\text{CDCl}_3$ )  $\delta$  167.1, 154.1, 142.6, 135.0, 124.4, 113.7, 105.3, 66.2, 52.0, 23.8, 22.7; HRMS calcd for  $\text{C}_{16}\text{H}_{18}\text{O}_4$   $[\text{M}]^+$  274.1206, found 274.1205.

**3-(3,4,7,8-Tetrahydro-2H,6H-pyrano[3,2-g]chromen-5-yl)-acrylic acid *tert*-butyl ester (22).**

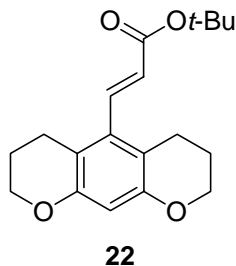

Following the general procedure for the alkylation/alkenylation reaction (irradiated for 10 min instead of 5 min) using **20** and *tert*-butyl acrylate, and purification by flash chromatography using 25% EtOAc/hexanes as eluant resulted in **22** (44 mg, 70%) as a white solid, mp = 116-117 °C (the resulting solid from the evaporation of 25% EtOAc/hexanes).  $R_f$  = 0.55 on silica gel (10% EtOAc/hexanes). IR (neat) 1711, 1602, 1462, 1296, 1140  $\text{cm}^{-1}$ ;  $^1\text{H}$  NMR (400 MHz,  $\text{CDCl}_3$ )  $\delta$



7.57 (d, 1H,  $J = 16.4$  Hz), 6.30 (s, 1H), 5.96 (d, 1H,  $J = 16.5$  Hz), 4.11 (t, 4H,  $J = 5.1$  Hz), 2.67 (t, 4H,  $J = 6.4$  Hz), 1.95 (quintet, 4H,  $J = 6.4$  Hz), 1.54 (s, 9H);  $^{13}\text{C}$  NMR (100 MHz,  $\text{CDCl}_3$ )  $\delta$  166.1, 154.1, 141.1, 135.3, 126.6, 113.7, 105.0, 80.9, 66.2, 28.4, 23.8, 22.8; HRMS calcd for  $\text{C}_{19}\text{H}_{24}\text{O}_4$   $[\text{M}]^+$  316.1680, found 316.1675.

**3-(2,3,4,5,7,8,9,10-Octahydro-1,11-dioxo-benzo[1,2;4,5]dicyclohepten-6-yl)-acrylic acid *tert*-butyl ester (24).**

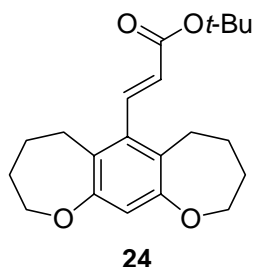

Following the general procedure for the alkylation/alkenylation reaction (irradiated for 20 min instead of 5 min) using **23** and *tert*-butyl acrylate, and purification by flash chromatography using 10% EtOAc/hexanes as eluant resulted in **24** (42 mg, 68%) as a white solid, mp = 108-109 °C (the resulting solid from the evaporation of 10% EtOAc/hexanes).  $R_f = 0.53$  on silica gel (10% EtOAc/hexanes). IR (neat) 2932, 1728, 1591, 1455, 1367, 1256, 1150  $\text{cm}^{-1}$ ;  $^1\text{H}$  NMR (300 MHz,  $\text{CDCl}_3$ )  $\delta$  7.70 (d, 1H,  $J = 16.2$  Hz), 6.66 (s, 1H), 5.75 (d, 1H,  $J = 16.2$  Hz), 3.99 (t, 4H,  $J = 5.1$  Hz), 2.76 (m, 4H), 1.93 (quintet, 4H,  $J = 5.6$  Hz), 1.65 (quintet, 4H,  $J = 5.3$  Hz), 1.59 (s, 9H);  $^{13}\text{C}$  NMR (75 MHz,  $\text{CDCl}_3$ )  $\delta$  165.9, 159.5, 143.7, 135.7, 129.3, 127.1, 114.3, 81.0, 73.9, 32.3, 29.6, 28.4, 25.9; HRMS calcd for  $\text{C}_{21}\text{H}_{28}\text{O}_4$   $[\text{M}]^+$  344.1986, found 344.1988.

**3-(4,5,6,8-Tetrahydro-1H,3H-2,7-dioxanthracen-10-yl)-acrylic acid *tert*-butyl ester (26).**

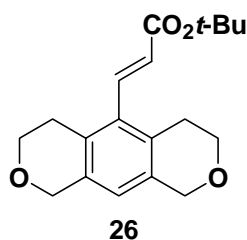

Following the general procedure for the alkylation/alkenylation reaction using **25**, *tert*-butyl acrylate and 5 equiv of norbornene (1.00 mmol), followed by purification by flash chromatography using 10% EtOAc/hexanes as eluant resulted in **26** (45 mg, 80%) as a white solid (the resulting solid from the evaporation of 10% EtOAc/hexanes), mp = 115-116 °C.  $R_f$  = 0.29 on silica gel (20% EtOAc/hexanes). IR (neat)  $\nu$  = 1710, 1639, 1469, 1384, 1367, 1327, 1281, 1259, 1232, 1153, 1114, 1071, 982  $\text{cm}^{-1}$ ;  $^1\text{H}$  NMR (300 MHz,  $\text{CDCl}_3$ )  $\delta$  7.62 (d, 1H,  $J$  = 16.4 Hz), 6.62 (s, 1H), 6.00 (d, 1H,  $J$  = 16.4 Hz), 4.74 (s, 4H), 3.94 (t, 4H,  $J$  = 5.7 Hz), 2.80 (t, 4H,  $J$  = 5.7 Hz), 1.54 (s, 9H);  $^{13}\text{C}$  NMR (75 MHz,  $\text{CDCl}_3$ )  $\delta$  165.8, 140.2, 134.0, 132.9, 130.3, 126.7, 120.8, 80.9, 68.0, 65.4; HRMS calcd for  $\text{C}_{19}\text{H}_{24}\text{O}_4$   $[\text{M}]^+$  316.1675, found 316.1673.

***N,N*-Dimethyl-3-(4,5,6,8-tetrahydro-1H,3H-2,7-dioxanthracen-10-yl)-acrylamide (27).**

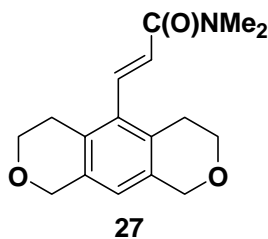

Following the general procedure for the alkylation/alkenylation reaction using **25**, *N,N*-dimethyl acrylamide and 5 equiv of norbornene (1.00 mmol), followed by purification by flash chromatography using 50-75% EtOAc/ $\text{CH}_2\text{Cl}_2$  + 1%  $\text{Et}_3\text{N}$  as eluant resulted in **27** (34 mg, 58%) as a white solid (the resulting solid from the evaporation of EtOAc), mp = 165-167 °C.  $R_f$  = 0.1 on silica gel (50% EtOAc/ $\text{CH}_2\text{Cl}_2$ ). IR (neat)  $\nu$  = 2360, 2333, 1651, 1607, 1466, 1394, 1386,

1129, 1112, 1070, 996, 982, 892  $\text{cm}^{-1}$ ;  $^1\text{H}$  NMR (400 MHz,  $\text{CDCl}_3$ )  $\delta$  7.65 (d, 1H,  $J = 15.8$  Hz), 6.62 (s, 1H), 6.52 (d, 1H,  $J = 15.8$  Hz), 4.74 (s, 4H), 3.93 (t, 4H,  $J = 5.7$  Hz), 3.12 (s, 3H), 3.08 (s, 3H), 2.80 (t, 4H,  $J = 5.7$  Hz);  $^{13}\text{C}$  NMR (75 MHz,  $\text{CDCl}_3$ )  $\delta$  166.3, 139.2, 135.3, 133.1, 130.1, 124.6, 120.5, 68.1, 65.6, 37.6, 36.1, 27.6; HRMS calcd for  $\text{C}_{17}\text{H}_{21}\text{NO}_3$   $[\text{M}]^+$  287.1521, found 287.1524.

**3-(4,5,6,8-Tetrahydro-1*H*,3*H*-2,7-dioxanthracen-10-yl)-acrylonitrile (28).**

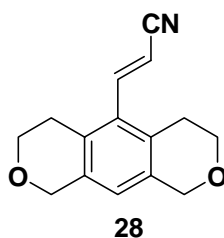

Following the general procedure for the alkylation/alkenylation reaction using **25**, acrylonitrile, and 5 equiv of norbornene (1.00 mmol), followed by purification by flash chromatography using 20-30% EtOAc/hexanes as eluant resulted in **28** (20 mg, 39%) as a white solid (the resulting solid from the evaporation of EtOAc), mp = 192-194  $^{\circ}\text{C}$ .  $R_f = 0.14$  on silica gel (20% EtOAc/hexanes). IR (neat)  $\nu = 2215, 1614, 1471, 1130, 1112, 972$   $\text{cm}^{-1}$ ;  $^1\text{H}$  NMR (300 MHz,  $\text{CDCl}_3$ )  $\delta$  7.46 (d, 1H,  $J = 17.0$  Hz), 6.67 (s, 1H), 5.59 (d, 1H,  $J = 17.0$  Hz), 4.73 (s, 4H), 3.94 (t, 4H,  $J = 5.6$  Hz), 2.76 (t, 4H,  $J = 5.6$  Hz);  $^{13}\text{C}$  NMR (100 MHz,  $\text{CDCl}_3$ )  $\delta$  147.9, 133.3, 132.8, 130.1, 121.9, 117.4, 103.7, 67.8, 65.1, 27.2; HRMS calcd for  $\text{C}_{15}\text{H}_{15}\text{NO}_2$   $[\text{M}]^+$  241.1103, found 241.1110.

**3-(8-Methoxy-2,3,5,6-tetrahydro-1,7-dithia-s-indacen-4-yl)-acrylic acid *tert*-butyl ester (30).**

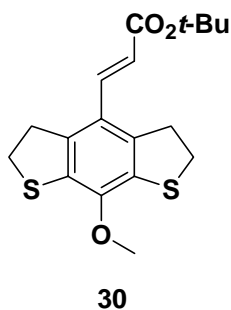

Following the general procedure for the alkylation/alkenylation reaction (irradiated for 10 min instead of 5 min) using **29** and *tert*-butyl acrylate, purification by flash chromatography followed using 0-5% EtOAc/hexanes as eluant, resulted in **30** (30 mg, 43%) as a yellow solid (the resulting solid from evaporation of EtOAc), mp = 92-94 °C.  $R_f$  = 0.29 on silica gel (10% EtOAc/hexanes). IR (neat)  $\nu$  = 1707, 1630, 1560, 1457, 1417, 1367, 1309, 1256, 1150, 1086, 980, 732  $\text{cm}^{-1}$ ;  $^1\text{H}$  NMR (400 MHz,  $\text{CDCl}_3$ )  $\delta$  7.62 (d, 1H,  $J$  = 16.3 Hz), 5.97 (d, 1H,  $J$  = 16.3 Hz), 3.88 (s, 3H), 3.35 (t, 8H,  $J$  = 1.5 Hz), 1.53 (s, 9H);  $^{13}\text{C}$  NMR (75 MHz,  $\text{CDCl}_3$ )  $\delta$  166.2, 149.1, 140.8, 138.4, 133.3, 124.0, 123.7, 80.8, 58.6, 35.9, 33.3, 28.2; HRMS calcd for  $\text{C}_{18}\text{H}_{22}\text{O}_3\text{S}_2$   $[\text{M}]^+$  350.1010, found 350.1013.

**3-(8-Methoxy-2,3,5,6-tetrahydro-1,7-dithia-s-indacen-4-yl)-*N,N*-dimethyl-acrylamide (31).**

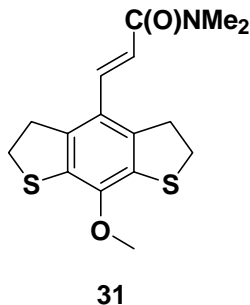

Following the general procedure for the alkylation/alkenylation reaction (irradiated for 10 min instead of 5 min) using **29** and *N,N*-dimethylacrylamide, purification by flash chromatography followed using 2-5% acetone/ $\text{CH}_2\text{Cl}_2$  as eluant, resulted in **31** (16 mg, 26%) as a off-white oil.  $R_f$  = 0.34 on silica gel (5% acetone/ $\text{CH}_2\text{Cl}_2$ ). IR (neat)  $\nu$  = 1648, 1639, 1632  $\text{cm}^{-1}$ ;  $^1\text{H}$  NMR (400

MHz, CDCl<sub>3</sub>)  $\delta$  7.66 (d, 1H,  $J$  = 15.7 Hz), 6.47 (d, 1H,  $J$  = 15.7 Hz), 3.88 (s, 3H), 3.35 (t, 8H,  $J$  = 3.8 Hz), 3.12 (s, 3H), 3.07 (s, 3H); <sup>13</sup>C NMR (125 MHz, CDCl<sub>3</sub>)  $\delta$  166.6, 148.9, 139.8, 138.1, 133.4, 125.2, 121.8, 58.9, 36.1, 33.7, 30.0; HRMS calcd for C<sub>16</sub>H<sub>20</sub>NO<sub>2</sub>S<sub>2</sub> (ESI) 322.0929, found 322.0934.

**3-(8-Methoxy-2,3,5,6-tetrahydro-1,7-dithia-s-indacen-4-yl)-acrylonitrile (32).**

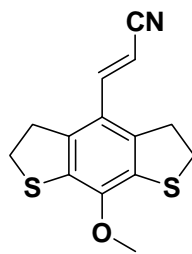

**32**

Following the general procedure for the alkylation/alkenylation reaction (irradiated for 10 min instead of 5 min) using **29** and acrylonitrile, purification by flash chromatography followed using 5-10% EtOAc/hexanes as eluant, resulted in **32** (10 mg, 19%) as an off-white solid (the resulting solid from the evaporation of EtOAc), mp = 164-166 °C.  $R_f$  = 0.16 on silica gel (10% EtOAc/hexanes). IR (neat)  $\nu$  = 2216, 1616, 1553, 1456, 1417, 1315, 1270, 1088, 965 cm<sup>-1</sup>; <sup>1</sup>H NMR (300 MHz, CDCl<sub>3</sub>)  $\delta$  7.42 (d, 1H,  $J$  = 16.9 Hz), 5.50 (d, 1H,  $J$  = 16.9 Hz), 3.89 (s, 3H), 3.41 - 3.26 (m, 8H); <sup>13</sup>C NMR (75 MHz, CDCl<sub>3</sub>)  $\delta$  149.9, 148.1, 138.1, 133.9, 123.0, 118.0, 100.1, 58.7, 35.7, 33.2; HRMS calcd for C<sub>14</sub>H<sub>13</sub>NOS<sub>2</sub> [M]<sup>+</sup> 275.0439, found 275.0435.

**3-(3,3,6,6-Tetramethyl-3,4,6,7-tetrahydro-2H,5H-1,8-dioxa-3,6-disila-anthracen-10-yl)-acrylic acid *tert*-butyl ester (34).**

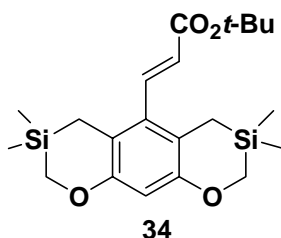

Following the general procedure for the alkylation/alkenylation reaction using **33** and *tert*-butyl acrylate at 160 °C, followed by purification by flash chromatography using 0-5% EtOAc/hexanes as eluant resulted in **34** (48 mg, 60%) as a colourless oil.  $R_f = 0.19$  on silica gel (5% EtOAc/hexanes). IR (neat)  $\nu = 1711, 1640, 1586, 1442, 1367, 1290, 1251, 1151, 1113, 911, 842, 733 \text{ cm}^{-1}$ ;  $^1\text{H}$  NMR (400 MHz,  $\text{CDCl}_3$ )  $\delta$  7.65 (d, 1H,  $J = 16.3 \text{ Hz}$ ), 6.58 (s, 1H), 5.80 (d, 1H,  $J = 16.3 \text{ Hz}$ ), 3.70 (s, 4H), 1.91 (s, 4H), 1.57 (s, 9H), 0.14 (s, 12H);  $^{13}\text{C}$  NMR (100 MHz,  $\text{CDCl}_3$ )  $\delta$  166.1, 156.5, 143.7, 137.3, 126.9, 121.3, 111.4, 80.9, 64.0, 28.5, 13.4, -3.0; HRMS calcd for  $\text{C}_{21}\text{H}_{32}\text{O}_4\text{Si}_2 [\text{M}]^+$  404.1839, found 404.1832.

**3-[1,7-Bis-(toluene-4-sulfonyl)-1,2,3,5,6,7-hexahydro-pyrrolo[3,2-*f*]indol-4-yl]-acrylic acid *tert*-butyl ester (36).**

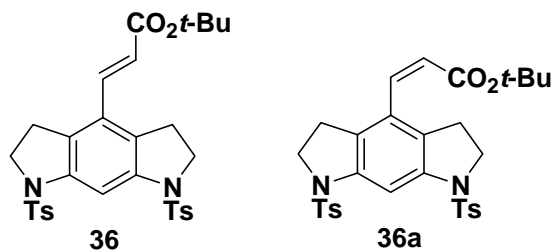

Following the general procedure for the alkylation/alkenylation reaction using **35** and *tert*-butyl acrylate and 5 equiv of norbornene (1.00 mmol), the reaction vessel was subjected to microwave irradiation at 160 °C for 5 min. Purification by flash chromatography followed using 5/35/60

Et<sub>2</sub>O/CH<sub>2</sub>Cl<sub>2</sub>/hexanes as eluant, resulted in **36** (47 mg, 39%) as a colorless oil. *R<sub>f</sub>* = 0.15 on silica gel (20% EtOAc/hexanes). **trans-isomer**: IR (neat)  $\nu$  = 1652, 1635, 1354, 1267, 1164, 1096 cm<sup>-1</sup>; <sup>1</sup>H NMR (400 MHz, CDCl<sub>3</sub>)  $\delta$  7.90 (s, 1H), 7.74 (d, 4H, *J* = 8.3 Hz), 7.34 (d, 1H, *J* = 16.3 Hz), 7.25 (d, 4H, *J* = 8.3 Hz), 5.94 (d, 1H, *J* = 16.3 Hz), 3.99 (t, 4H, *J* = 8.4 Hz), 2.92 (t, 4H, *J* = 8.4 Hz), 2.39 (s, 6H), 1.47 (s, 9H); <sup>13</sup>C NMR (100 MHz, CDCl<sub>3</sub>)  $\delta$  166.1, 144.5, 142.8, 138.8, 134.1, 130.1, 128.0, 127.9, 126.6, 124.4, 103.3, 81.3, 50.8, 28.4, 27.7, 21.8; HRMS calcd for C<sub>31</sub>H<sub>34</sub>N<sub>2</sub>O<sub>6</sub>S<sub>2</sub> [M]<sup>+</sup> 594.185831, found 594.185481. **cis-isomer (36a)**: *R<sub>f</sub>* = 0.15 on silica gel (20% EtOAc/hexanes). IR (neat)  $\nu$  = 1715, 1699, 1597, 1352, 1164, 1094, 815, 668 cm<sup>-1</sup>; <sup>1</sup>H NMR (400 MHz, CDCl<sub>3</sub>)  $\delta$  7.83 (s, 1H), 7.76 (d, 4H, *J* = 8.3 Hz), 7.25 (d, 4H, *J* = 8.3 Hz), 6.57 (d, 1H, *J* = 12.0 Hz), 5.88 (d, 1H, *J* = 12.0 Hz), 3.92 (t, 4H, *J* = 8.4 Hz), 2.65 (t, 4H, *J* = 8.4 Hz), 2.39 (s, 6H), 1.09 (s, 9H); <sup>13</sup>C NMR (100 MHz, CDCl<sub>3</sub>)  $\delta$  164.8, 144.2, 141.8, 137.4, 134.1, 130.9, 129.9, 127.9, 126.1, 124.6, 101.3, 80.7, 50.9, 27.8, 26.6, 21.8; HRMS calcd for C<sub>31</sub>H<sub>34</sub>N<sub>2</sub>O<sub>6</sub>S<sub>2</sub> [M]<sup>+</sup> 594.185831, found 594.186567.

## Synthesis of Mescaline Analogue 2

### 1,3,5-Triiodo-2-methoxybenzene (**45**).

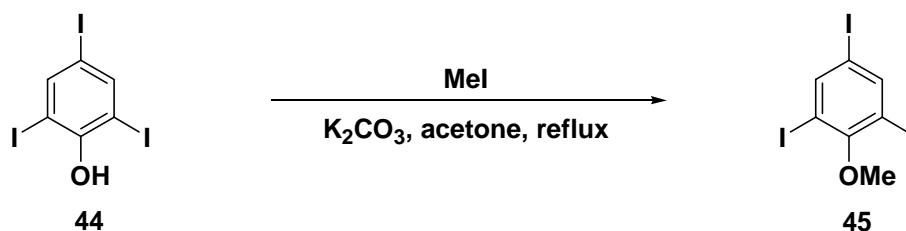

To a solution of 2,4,6-triiodophenol (**44**) (10.0 g, 21.2 mmol, 1 equiv) in acetone (175 mL) was added K<sub>2</sub>CO<sub>3</sub> (4.40 g, 31.8 mmol, 1.5 equiv). The mixture was stirred at rt for 30 min then iodomethane (2.00 mL, 31.8 mmol, 1.5 equiv) was added. The mixture was heated at reflux for 3 h, cooled to rt and filtered through Celite™. Evaporation of the volatiles gave a crude product that

was purified by flash chromatography using 10% EtOAc/hexanes as eluant yielding **45** (10 g, 98%) as a pale yellow solid, mp = 93-94 °C (the resulting solid from the evaporation of 10% EtOAc/hexanes).  $R_f$  = 0.79 (10% EtOAc/hexanes). IR (neat) 1455, 1402  $\text{cm}^{-1}$ ;  $^1\text{H}$  NMR (300 MHz,  $\text{CDCl}_3$ )  $\delta$  8.05 (s, 2H), 3.84 (s, 3H);  $^{13}\text{C}$  NMR (75 MHz,  $\text{CDCl}_3$ )  $\delta$  159.3, 147.5, 91.9, 89.5, 61.0; HRMS calcd for  $\text{C}_7\text{H}_5\text{I}_3\text{O}$   $[\text{M}]^+$  485.7481, found 485.7474.

#### 5-Iodo-2-methoxybenzene-1,3-diol (**4**).

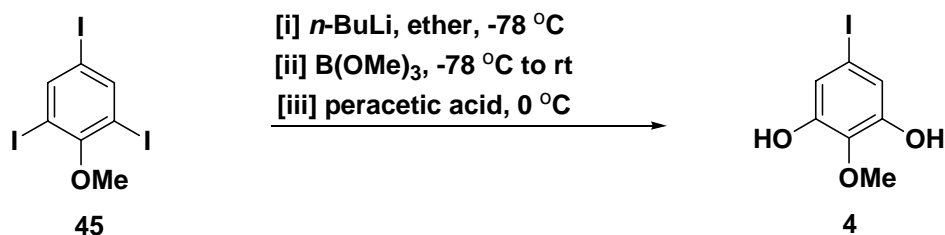

To a -78 °C solution of **45** (8.61 g, 17.7 mmol, 1 equiv) in ether (165 mL) was added dropwise *n*-BuLi (24.4 mL, 38.9 mmol, 1.6 M in hexanes, 2.2 equiv). The mixture was stirred at -78 °C for 1 h then trimethyl borate (20.0 mL, 177 mmol, 10 equiv) was added at once. The reaction was warmed to rt over 16 h then cooled to 0 °C. Peracetic acid solution (12.0 mL, 177 mmol, 32 wt% in dilute acetic acid, 10 equiv) was added dropwise. The reaction was stirred at 0 °C for 30 min then quenched with saturated aqueous  $\text{NaHCO}_3$  (12 mL) and then warmed to rt. Water (170 mL) and ether (170 mL) were added and the organic layer was washed with saturated aqueous  $\text{Na}_2\text{S}_2\text{O}_3$ , brine, dried with  $\text{MgSO}_4$ , filtered, and concentrated. The crude mixture was purified by flash chromatography using 25% EtOAc/hexanes as eluant to yield **4** (3.6 g, 77%) as a pale yellow solid, mp = 90-91 °C (the resulting solid from the evaporation of 25% EtOAc/hexanes).  $R_f$  = 0.23 on silica gel (25% EtOAc/hexanes). IR (neat) 3395, 1582, 1487, 1161  $\text{cm}^{-1}$ ;  $^1\text{H}$  NMR (300 MHz,  $\text{CDCl}_3$ )  $\delta$  6.87 (s, 2H), 5.93 (brs, 2OH), 3.85 (s, 3H);  $^{13}\text{C}$  NMR (75 MHz,  $\text{CDCl}_3$ )  $\delta$  149.8, 135.0, 117.9, 87.2, 61.4; HRMS calcd for  $\text{C}_7\text{H}_7\text{IO}_3$   $[\text{M}]^+$  265.9439, found 265.9440.



**1,3-Bis(2-bromoethoxy)-5-iodo-2-methoxybenzene (3).**

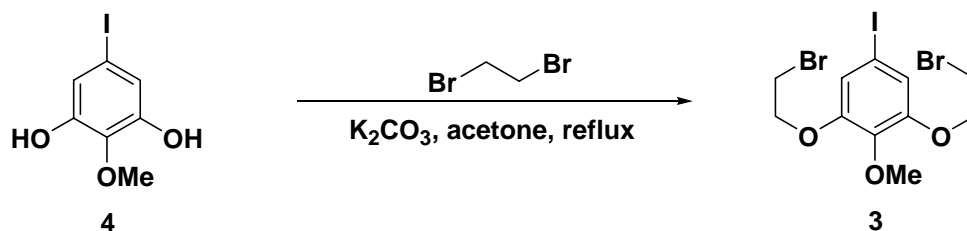

To a solution of **4** (5.16 g, 19.4 mmol, 1 equiv) and 1,2-dibromoethane (25.0 mL, 291 mmol, 15 equiv) in acetone (35 mL) was added  $\text{K}_2\text{CO}_3$  (13.5 g, 97.1 mmol, 5 equiv). The mixture was heated at reflux for 36 h. The reaction was cooled to rt and filtered through Celite™. Distillation of the excess 1,2-dibromoethane gave a crude oil that was purified by flash chromatography using 10% EtOAc/hexanes as eluant yielding **3** (7.8 g, 84%) as a white solid, mp = 82-83 °C (the resulting solid from the evaporation of 10% EtOAc/hexanes).  $R_f$  = 0.55 on silica gel (10% EtOAc/hexanes). IR (neat) 1581, 1496, 1417, 1128  $\text{cm}^{-1}$ ;  $^1\text{H}$  NMR (300 MHz,  $\text{CDCl}_3$ )  $\delta$  6.92 (s, 2H), 4.24 (t, 4H,  $J$  = 6.1 Hz), 3.87 (s, 3H), 3.65 (t, 4H,  $J$  = 6.1 Hz);  $^{13}\text{C}$  NMR (75 MHz,  $\text{CDCl}_3$ )  $\delta$  153.1, 140.1, 118.3, 85.9, 69.6, 61.5, 29.2; HRMS calcd for  $\text{C}_{11}\text{H}_{13}\text{Br}_2\text{IO}_3$   $[\text{M}]^+$  477.8283, found 477.8276.

**3-(8-Methoxy-2,3,5,6-tetrahydro-benzo[1,2-*b*:5,4-*b'*]difuran-4-yl)-acrylic acid *tert*-butyl ester (47).**

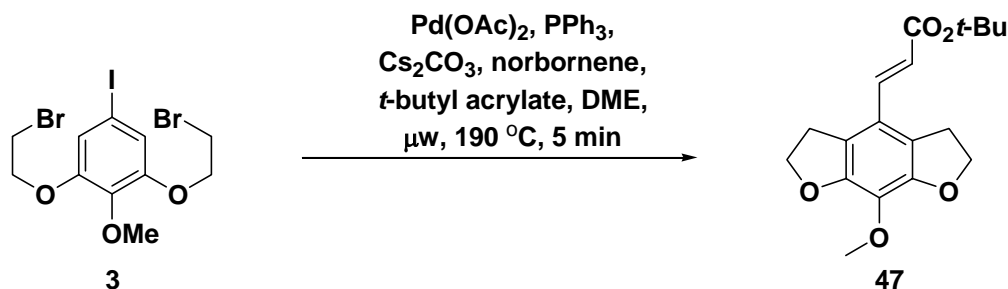

Following the general procedure for the alkylation/alkenylation reaction using **3** (96.0 mg, 0.200 mmol) and *tert*-butyl acrylate, and purification by flash chromatography using 10% EtOAc/hexanes as eluant resulted in **47** (51 mg, 81%) as a pale yellow solid, mp = 116-117 °C

(the resulting solid from the evaporation of 10% EtOAc/hexanes).  $R_f = 0.31$  on silica gel (10% EtOAc/hexanes). IR (neat) 1702, 1604, 1500, 1421  $\text{cm}^{-1}$ ;  $^1\text{H}$  NMR (300 MHz,  $\text{CDCl}_3$ )  $\delta$  7.53 (d, 1H,  $J = 16.2$  Hz), 6.07 (d, 1H,  $J = 16.2$  Hz), 4.65 (t, 4H,  $J = 8.8$  Hz), 4.00 (s, 3H), 3.27 (t, 4H,  $J = 8.8$  Hz), 1.53 (s, 9H);  $^{13}\text{C}$  NMR (75 MHz,  $\text{CDCl}_3$ )  $\delta$  166.8, 150.7, 140.1, 131.3, 121.3, 121.0, 120.8, 80.7, 72.7, 60.4, 30.2, 28.3; HRMS calcd for  $\text{C}_{18}\text{H}_{22}\text{O}_5$   $[\text{M}]^+$  318.1469, found 318.1467.

**3-(8-Methoxy-2,3,5,6-tetrahydro-benzo[1,2-*b*;5,4-*b'*]difuran-4-yl)-propionic acid *tert*-butyl ester (**48**).**

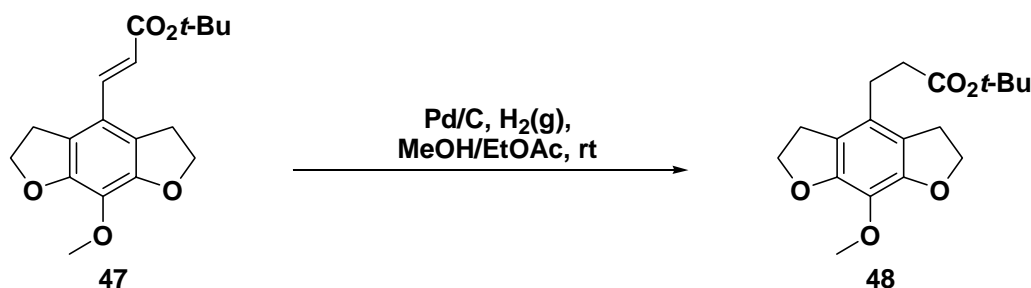

A solution of **47** (270 mg, 0.848 mmol, 1 equiv) and palladium on carbon (90 mg, 0.0848 mmol, [loading: 10 wt%, support activated carbon], 10 mol%), in MeOH/EtOAc 1:1 (20 mL) was hydrogenated at 40 psi in a Parr hydrogenator for 12 h. The mixture was filtered through Celite™ and concentrated. Purification by flash chromatography using 5% EtOAc/hexanes as eluant resulted in **48** (270 mg, 98%) as a white solid, mp = 62-63 °C (the resulting solid from the evaporation of 5% EtOAc/hexanes).  $R_f = 0.24$  on silica gel (10% EtOAc/hexanes). IR (neat) 2978, 1728, 1605, 1504, 1422, 1336  $\text{cm}^{-1}$ ;  $^1\text{H}$  NMR (300 MHz,  $\text{CDCl}_3$ )  $\delta$  4.60 (t, 4H,  $J = 8.5$  Hz), 3.93 (s, 3H), 3.10 (t, 4H,  $J = 8.5$  Hz), 2.73 (t, 2H,  $J = 7.6$  Hz), 2.40 (t, 2H,  $J = 8.5$  Hz), 1.42 (s, 9H);  $^{13}\text{C}$  NMR (75 MHz,  $\text{CDCl}_3$ )  $\delta$  172.4, 150.7, 128.4, 126.5, 119.1, 80.7, 72.7, 60.5, 34.8, 28.7, 28.2, 26.7; HRMS calcd for  $\text{C}_{18}\text{H}_{24}\text{O}_5$   $[\text{M}]^+$  320.1623, found 320.1624.

**3-(8-Methoxy-2,3,5,6-tetrahydro-benzo[1,2-*b*;5,4-*b'*]difuran-4-yl)-propionic acid (**49**) from *tert*-butyl ester **48**.**

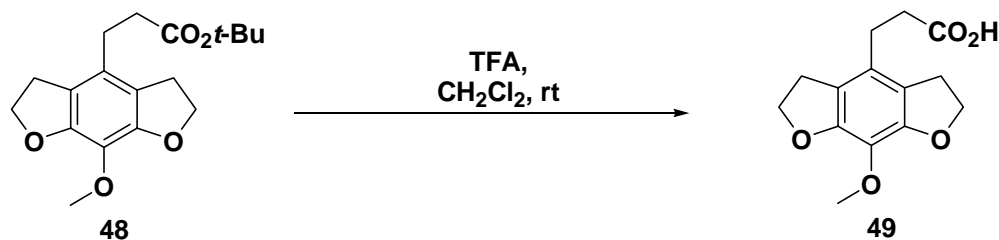

To a solution of **48** (110 mg, 0.343 mmol, 1 equiv) in  $\text{CH}_2\text{Cl}_2$  (5 mL) was added trifluoroacetic acid (5 mL). The mixture was stirred at rt for 12 h. Toluene (25 mL) was added and the solution was concentrated yielding pure **49** (78 mg, 87%) as a white solid, mp = 133-134 °C (the resulting solid from the evaporation of toluene).  $R_f$  = 0.10 on silica gel (50% EtOAc/hexanes). IR (neat) 2921, 1694, 1606, 1506, 1429  $\text{cm}^{-1}$ ;  $^1\text{H}$  NMR (300 MHz,  $\text{CDCl}_3$ )  $\delta$  4.61 (t, 4H,  $J$  = 8.6 Hz), 3.93 (s, 3H), 3.10 (t, 4H,  $J$  = 8.6 Hz), 2.78 (t, 2H,  $J$  = 7.3 Hz), 2.56 (t, 2H,  $J$  = 7.4 Hz);  $^{13}\text{C}$  NMR (75 MHz,  $\text{CDCl}_3$ )  $\delta$  179.1, 150.9, 128.5, 125.9, 119.1, 72.7, 60.5, 33.5, 28.7, 26.6; HRMS calcd for  $\text{C}_{14}\text{H}_{16}\text{O}_5$   $[\text{M}]^+$  264.0999, found 264.0998.

**3-(8-Methoxy-2,3,5,6-tetrahydro-benzo[1,2-*b*;5,4-*b'*]difuran-4-yl)-acrylic acid benzyl ester (**50**).**

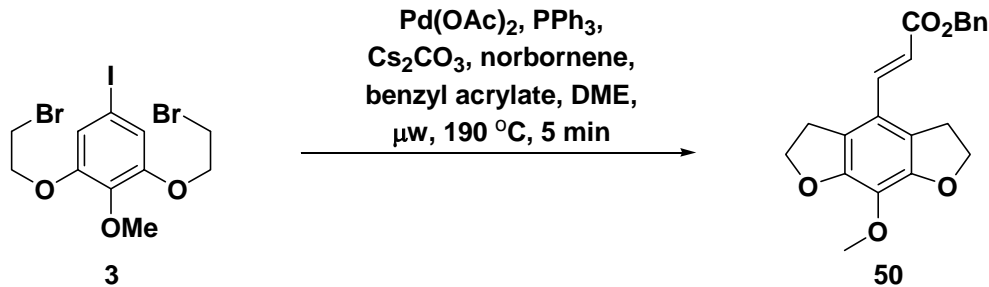

Following the general procedure for the alkylation/alkenylation reaction using **3** (96.0 mg, 0.200 mmol) and benzyl acrylate, and purification by flash chromatography using 25% EtOAc/hexanes as eluant resulted in **50** (51 mg, 73%) as a white solid, mp = 113-115 °C (the resulting solid from the evaporation of 25% EtOAc/hexanes).  $R_f$  = 0.25 on silica gel (25% EtOAc/hexanes). IR (neat)

2953, 1713, 1581, 1504, 1426, 1335, 1164  $\text{cm}^{-1}$ ;  $^1\text{H}$  NMR (300 MHz,  $\text{CDCl}_3$ )  $\delta$  7.66 (d, 1H,  $J = 16.3$  Hz), 7.40 (m, 5H), 6.18 (d, 1H,  $J = 16.3$  Hz), 5.24 (s, 2H), 4.65 (t, 4H,  $J = 8.6$  Hz), 4.01 (s, 3H), 3.27 (t, 4H,  $J = 8.6$  Hz);  $^{13}\text{C}$  NMR (75 MHz,  $\text{CDCl}_3$ )  $\delta$  167.3, 150.8, 141.8, 136.2, 131.6, 128.8, 128.6, 128.5, 121.1, 120.7, 118.9, 72.3, 66.6, 60.5, 30.2; HRMS calcd for  $\text{C}_{21}\text{H}_{20}\text{O}_5$   $[\text{M}]^+$  352.1305, found 352.1310.

**3-(8-Methoxy-2,3,5,6-tetrahydro-benzo[1,2-b;5,4-b']difuran-4-yl)-propionic acid (49) from benzyl ester 50.**

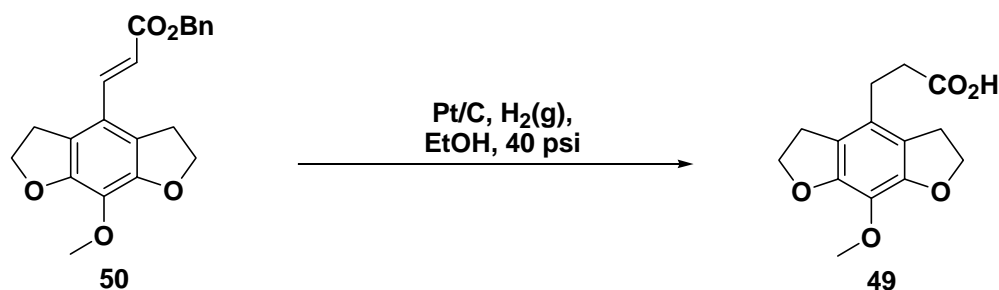

A solution of **50** (220 mg, 0.624 mmol, 1 equiv) and platinum on charcoal (487 mg, 0.124 mmol, [loading: 5 wt%, charcoal], 20 mol %), in EtOH (25 mL) was hydrogenated at 40 psi in a Parr hydrogenator for 12 h. The mixture was filtered through Celite™ and concentrated yielding **49** (130 mg, 79%), which was pure by NMR (see above for spectral data).

**[2-(8-Methoxy-2,3,5,6-tetrahydro-benzo[1,2-b;5,4-b']difuran-4-yl)-ethyl]-carbamic acid benzyl ester (51).**

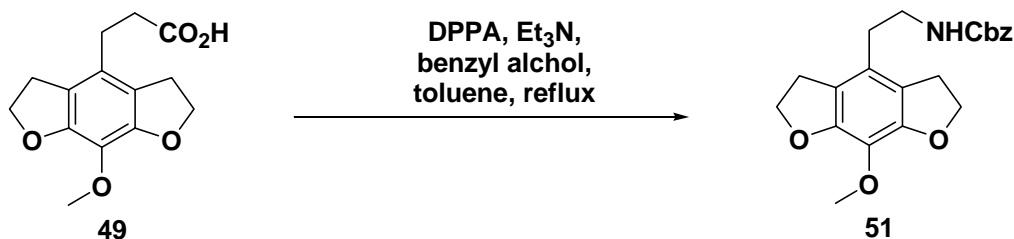

A solution of **49** (100 mg, 0.378 mmol, 1 equiv), diphenyl phosphoryl azide (100  $\mu\text{L}$ , 0.454 mmol, 1.2 equiv), and triethylamine (52.7  $\mu\text{L}$ , 0.378 mmol, 1 equiv) in toluene (3 mL) was stirred at rt for 30 min and then heated at reflux for 30 min. Benzyl alcohol (47.0  $\mu\text{L}$ , 0.454 mmol, 1.2

equiv) was added and the reaction was heated at reflux for 18 h. The organic layer was washed with 5% aqueous citric acid, water, saturated aqueous NaHCO<sub>3</sub>, brine, dried with anhydrous Na<sub>2</sub>SO<sub>3</sub>, filtered, and concentrated. The crude mixture was purified by flash chromatography using 40% EtOAc/hexanes as eluant yielding **51** (90 mg, 65%) as a colourless oil. *R*<sub>f</sub> = 0.22 on silica gel (40% EtOAc/hexanes). IR (neat) 3354, 2933, 1720, 1508, 1428, 1246 cm<sup>-1</sup>; <sup>1</sup>H NMR (300 MHz, CDCl<sub>3</sub>) δ 7.35 (m, 5H), 5.10 (s, 2H), 4.86 (brs, 1NH), 4.55 (t, 4H, *J* = 8.6 Hz), 3.92 (s, 3H), 3.34 (dd, 2H, *J* = 13.4, 6.8 Hz), 3.03 (t, 4H, *J* = 8.6 Hz), 2.65 (t, 2H, *J* = 7.0 Hz); <sup>13</sup>C NMR (75 MHz, CDCl<sub>3</sub>) δ 156.5, 150.8, 136.7, 128.7, 128.6, 128.4, 124.5, 119.6, 72.7, 66.8, 60.5, 40.4, 31.8, 28.8; HRMS calcd for C<sub>21</sub>H<sub>23</sub>NO<sub>5</sub> [M]<sup>+</sup> 369.1577, found 369.1576.

**2-(8-Methoxy-2,3,5,6-tetrahydro-benzo[1,2-b;5,4-b']difuran-4-yl)-ethylamine (2•HCl).**

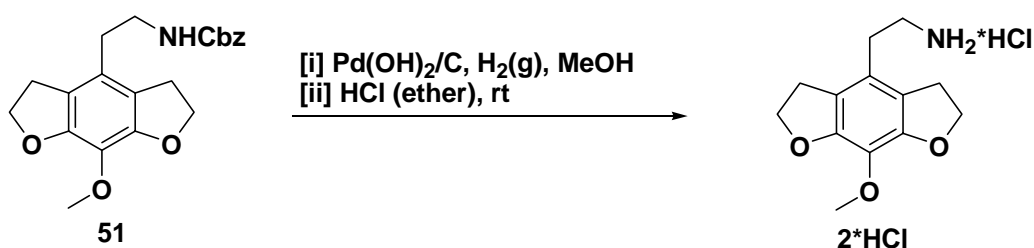

A solution of **51** (80.0 mg, 0.217 mmol, 1 equiv) and palladium hydroxide on carbon (30.4 mg, 0.0435 mmol, [loading: 20 wt%, support carbon wet], 20 mol%), in MeOH (10 mL) was hydrogenated at 40 psi in a Parr hydrogenator for 12 h. The mixture was filtered through Celite™ and concentrated. The crude solid was dissolved in MeOH (0.5 mL) and HCl (1 M in ether, 5 mL) was added. The solution was stirred at rt for 2 h and filtration of the precipitate provided pure **2•HCl** (56 mg, 94%) as a white solid, mp = 275-278 °C (recrystallized in ether). IR (neat) 2893, 2359, 1608, 1505, 1428, 1337 cm<sup>-1</sup>; <sup>1</sup>H NMR (400 MHz, CD<sub>3</sub>OD) δ 4.60 (t, 4H, *J* = 8.6 Hz), 3.82 (s, 3H), 3.13 (t, 4H, *J* = 8.6 Hz), 3.06 (dd, 2H, *J* = 8.6, 5.8 Hz), 2.83 (dd, 2H, *J* = 8.6,

5.9 Hz);  $^{13}\text{C}$  NMR (100 MHz,  $\text{CD}_3\text{OD}$ )  $\delta$  152.5, 130.3, 123.7, 121.1, 73.8, 60.7, 39.9, 30.2, 29.5;  
HRMS calcd for  $\text{C}_{13}\text{H}_{18}\text{ClNO}_3$   $[\text{M}-\text{HCl}]^+$  235.1217, found 235.1208.

## **References**

1. Prepared according to the literature procedure; Dol, C. C.; Kamer, C. J.; van Leeuwen, P. W. N. M. *Eur. J. Org. Chem.* **1998**, 359.

## NMR Spectra

$^1\text{H}$  NMR (300 MHz,  $\text{CDCl}_3$ ):

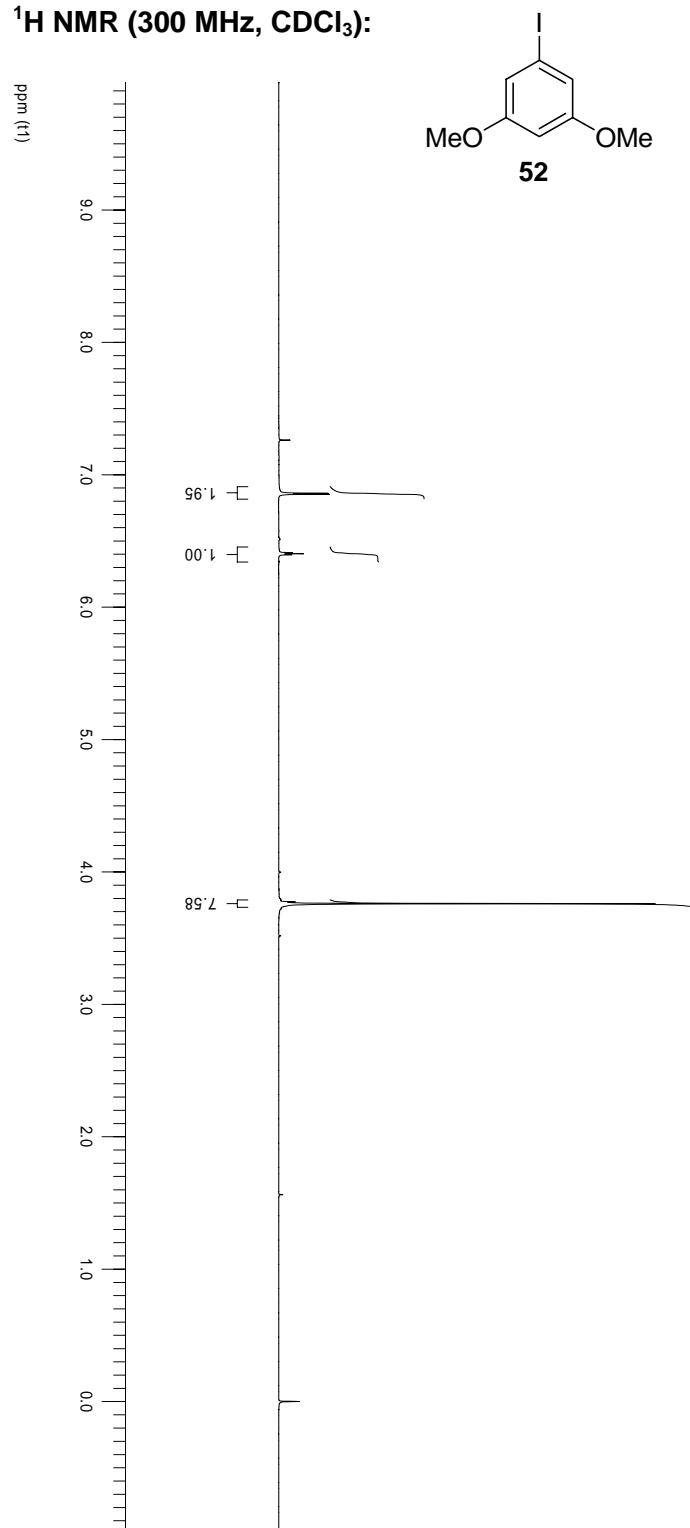

**$^{13}\text{C}$  NMR (75 MHz,  $\text{CDCl}_3$ )**

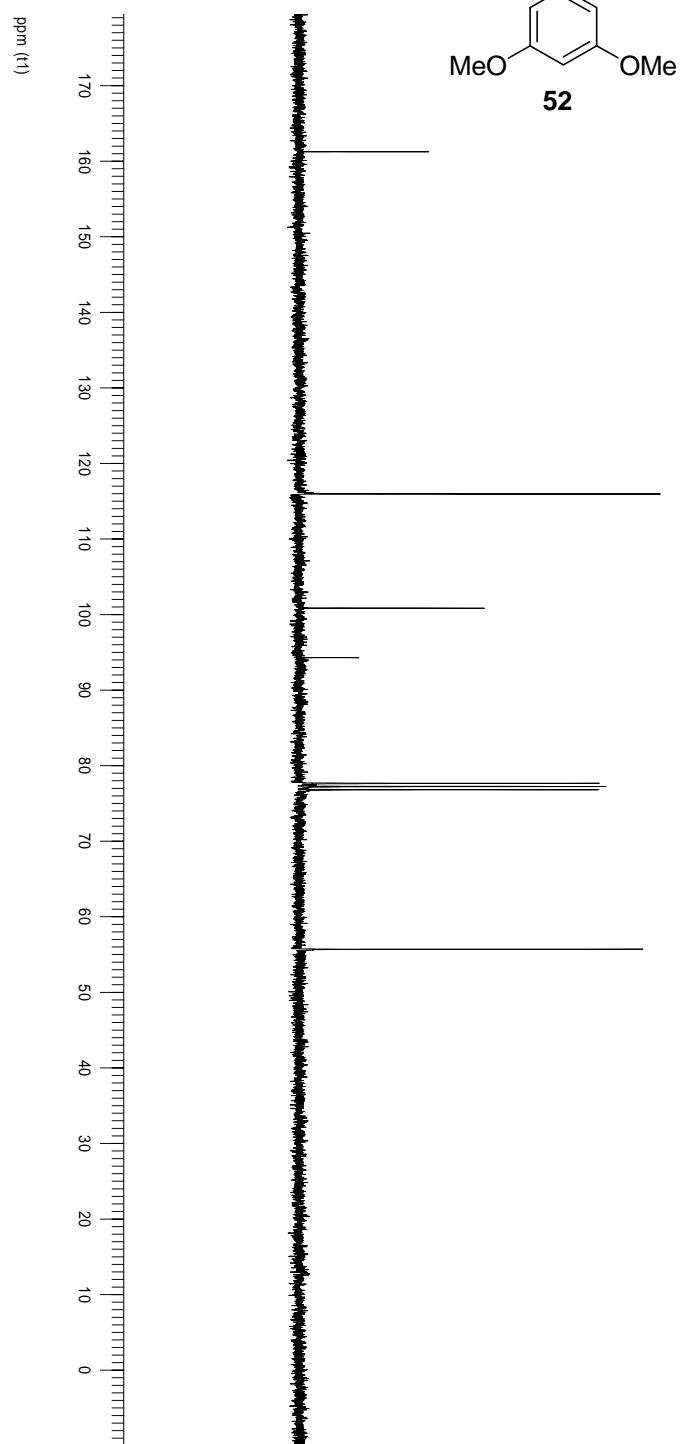



## ppm (t1)

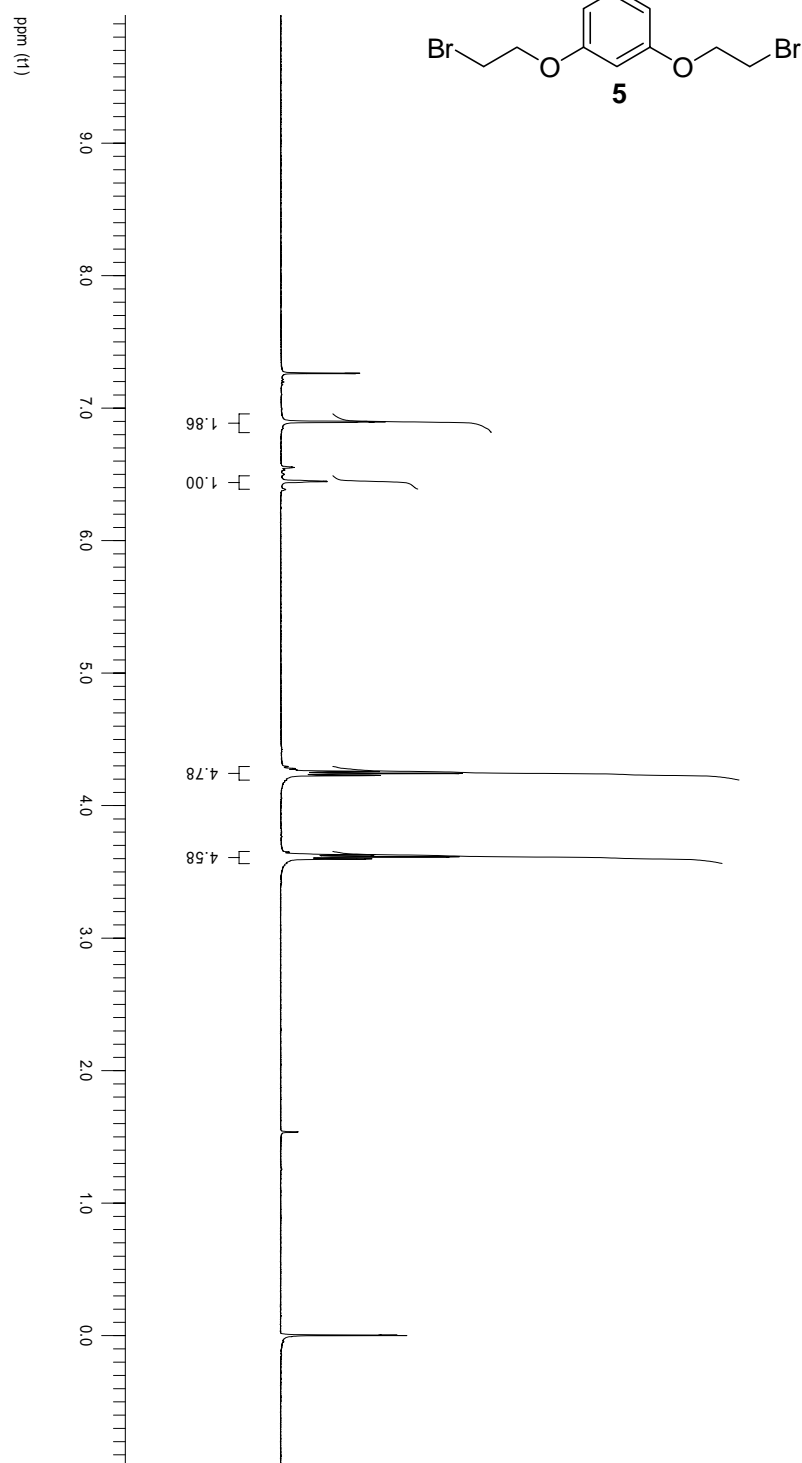

<sup>13</sup>C NMR (75 MHz, CDCl<sub>3</sub>)

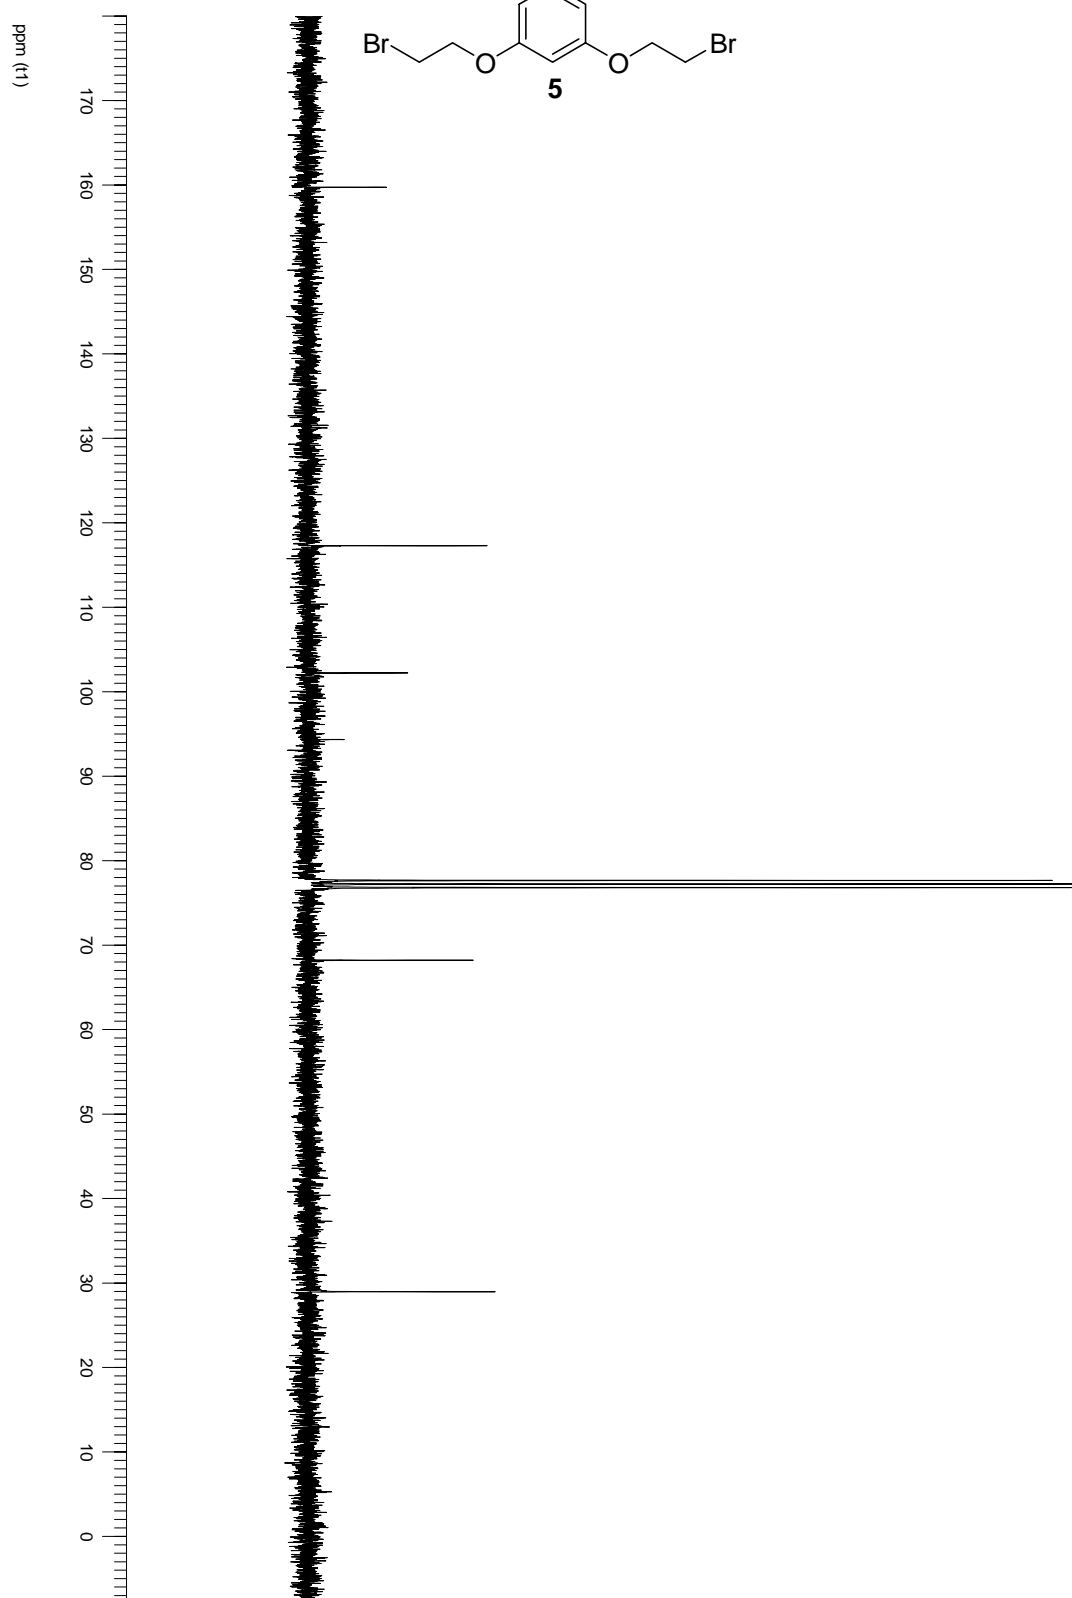

<sup>1</sup>H NMR (300 MHz, CDCl<sub>3</sub>)

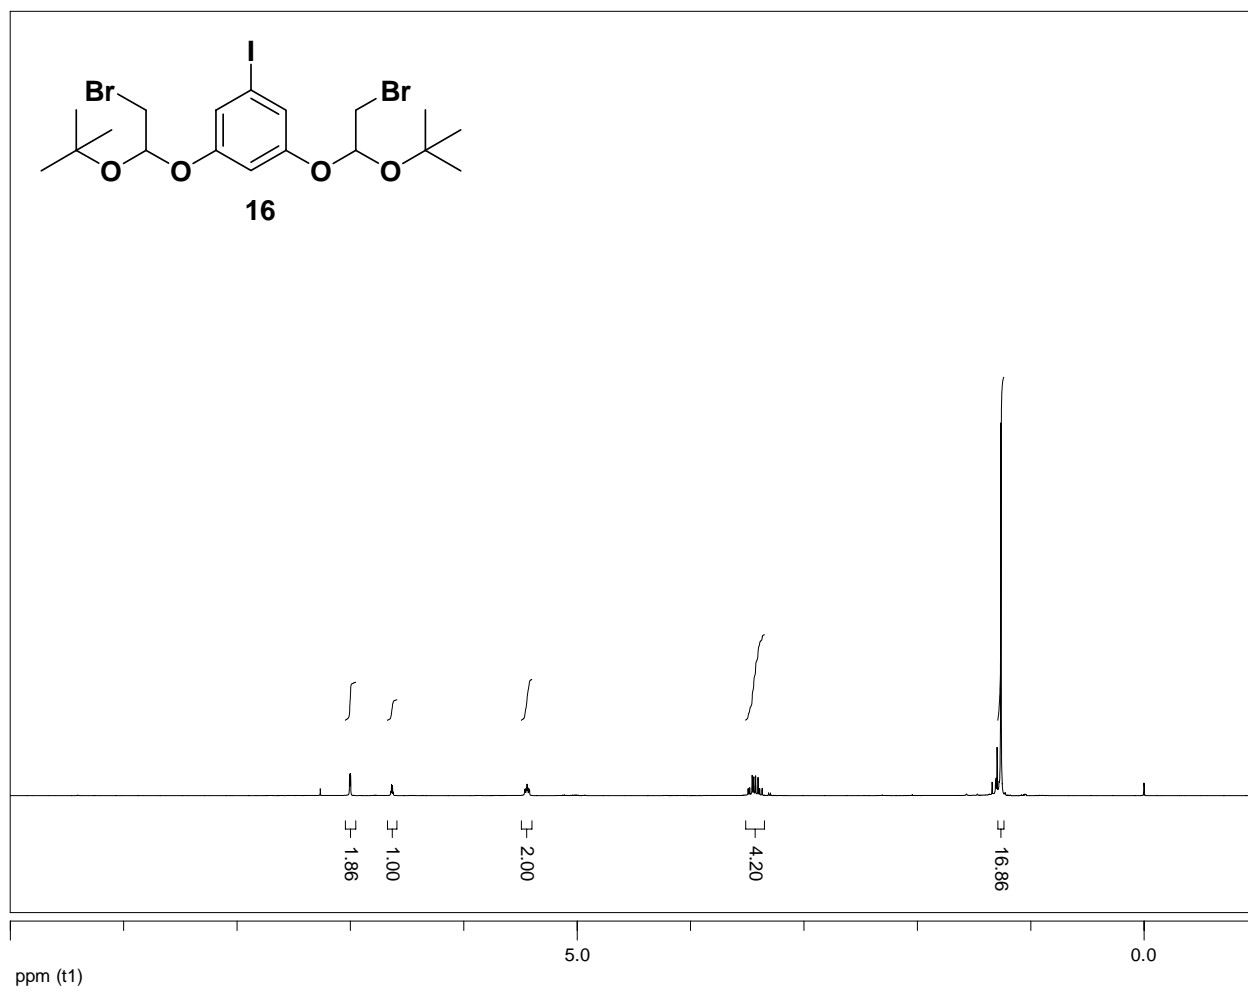

<sup>13</sup>C NMR (75 MHz, CDCl<sub>3</sub>)

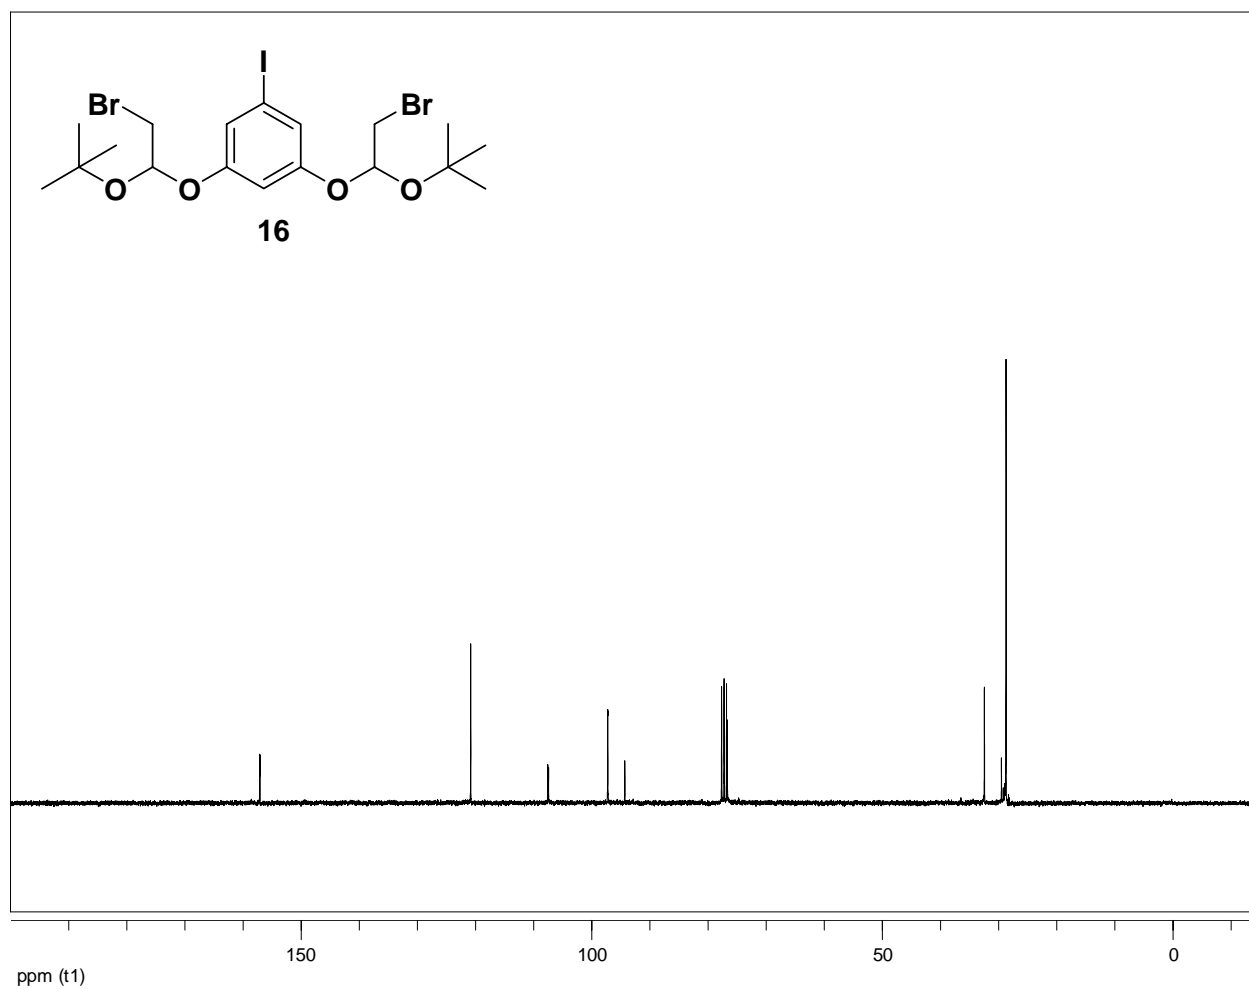

$^1\text{H}$  NMR (300 MHz,  $\text{CDCl}_3$ )

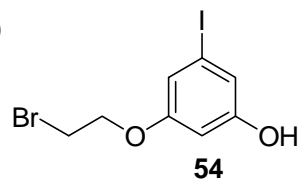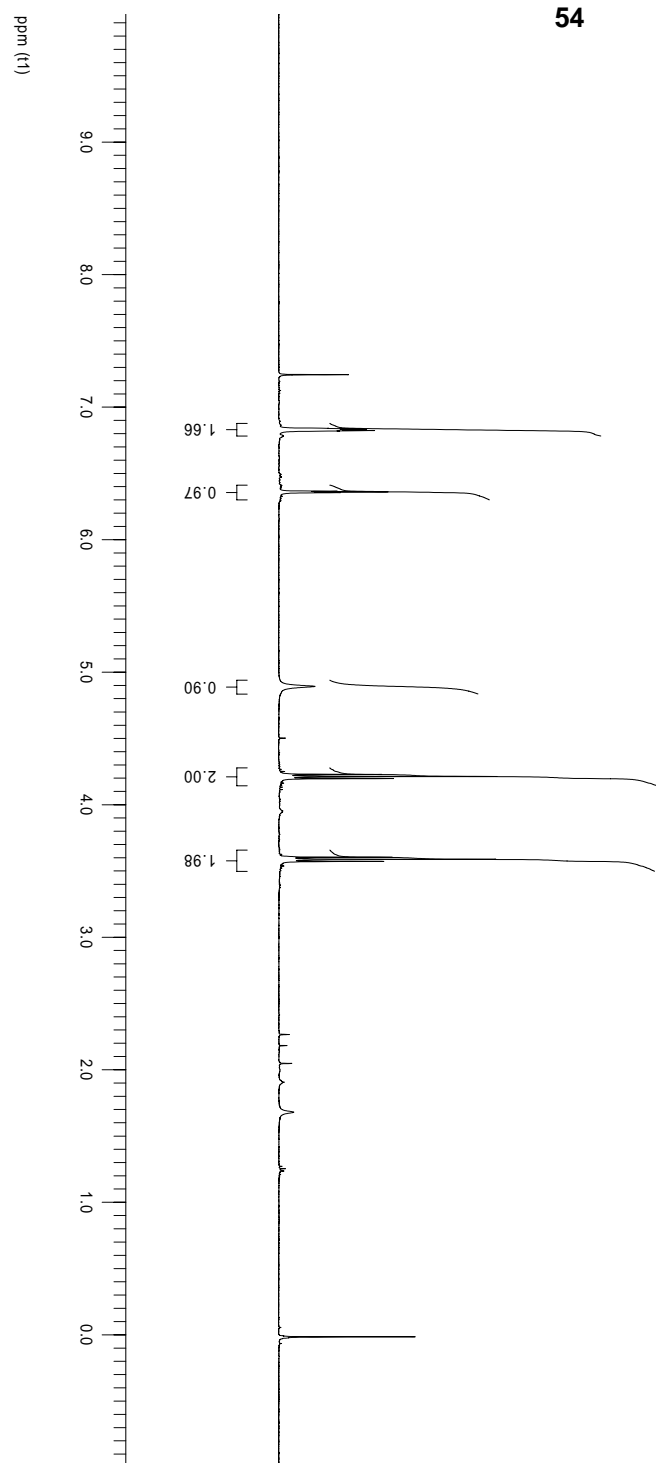

**$^{13}\text{C}$  NMR (75 MHz,  $\text{CDCl}_3$ )**

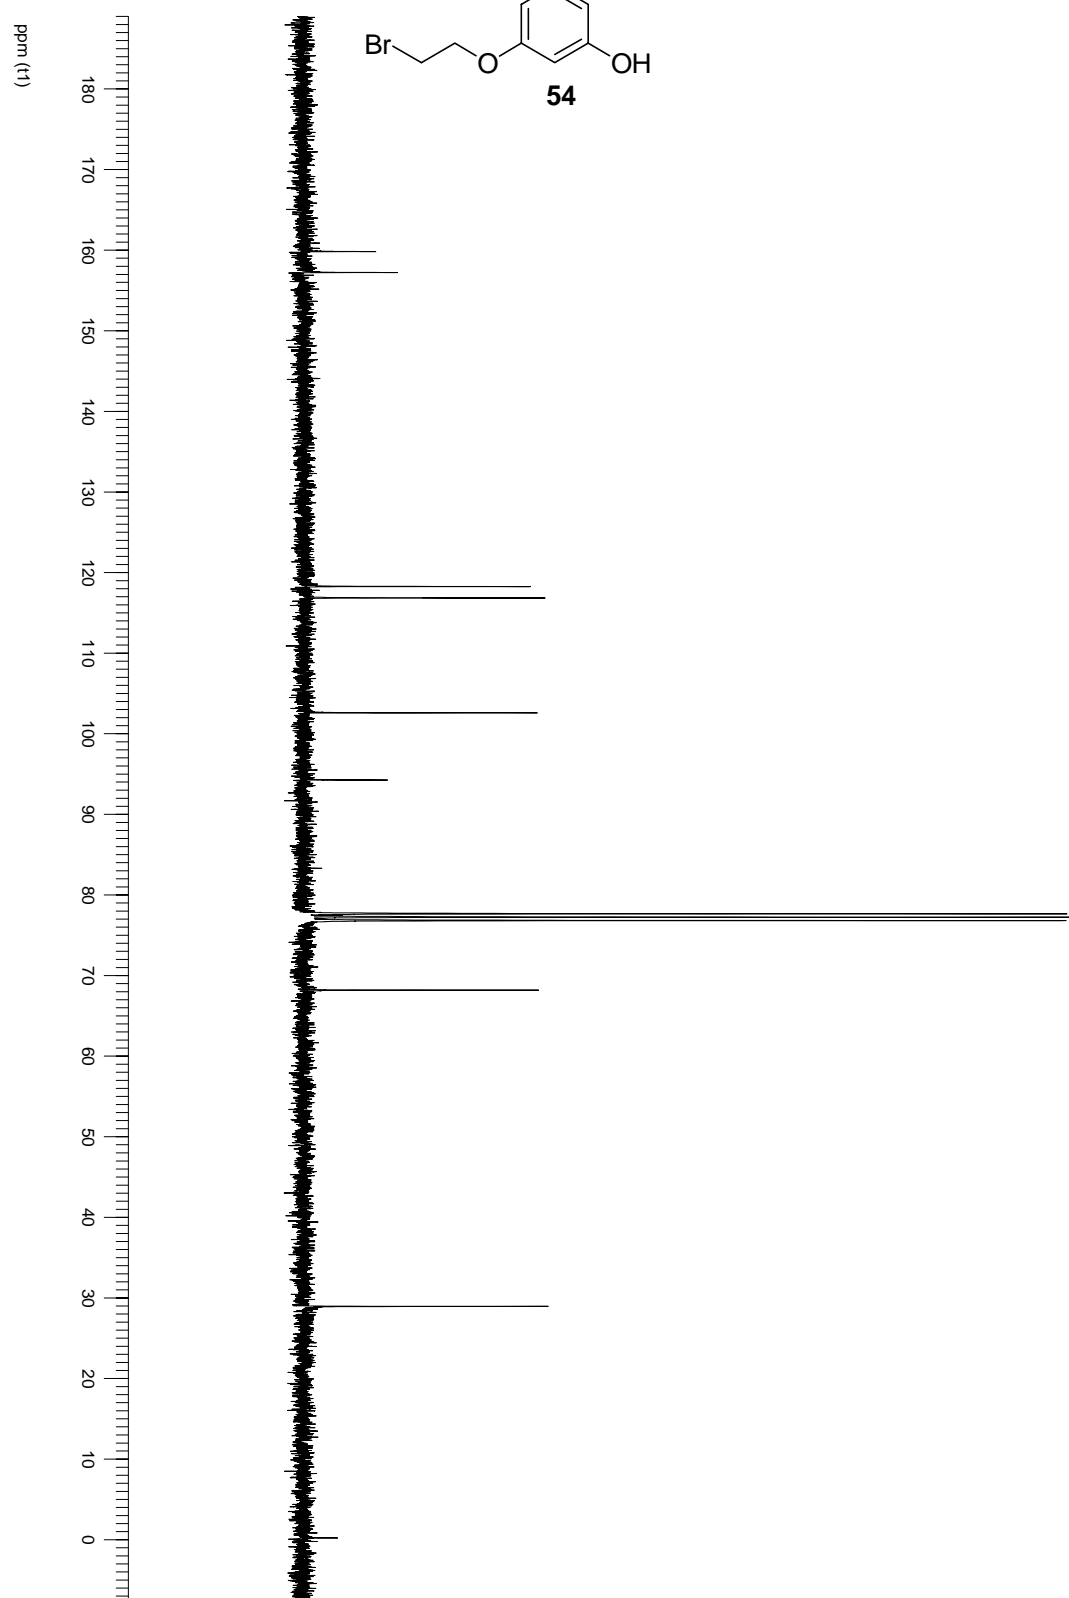

<sup>1</sup>H NMR (400 MHz, CDCl<sub>3</sub>)

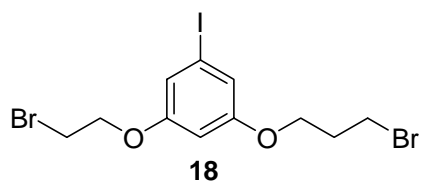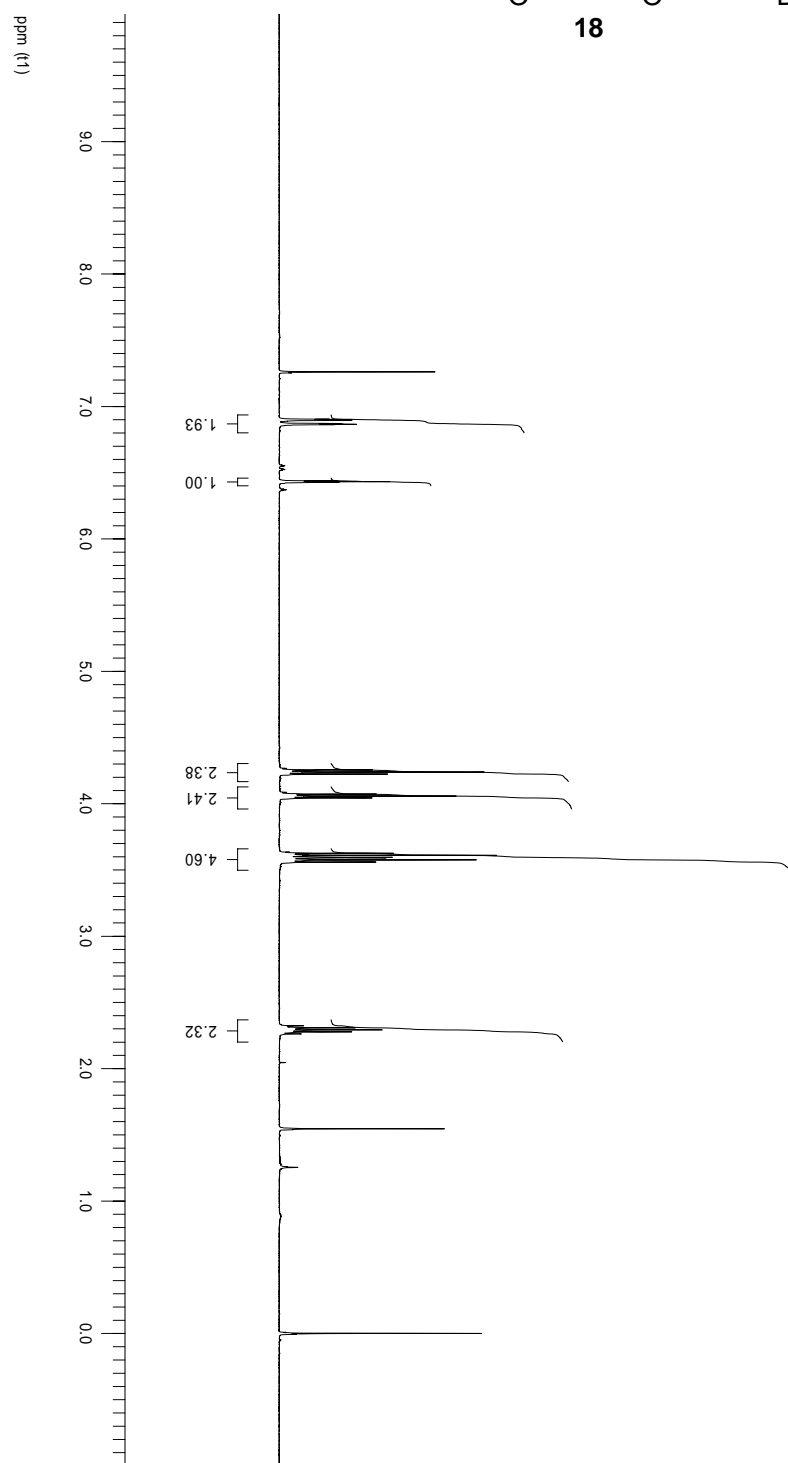

<sup>13</sup>C NMR (75 MHz, CDCl<sub>3</sub>)

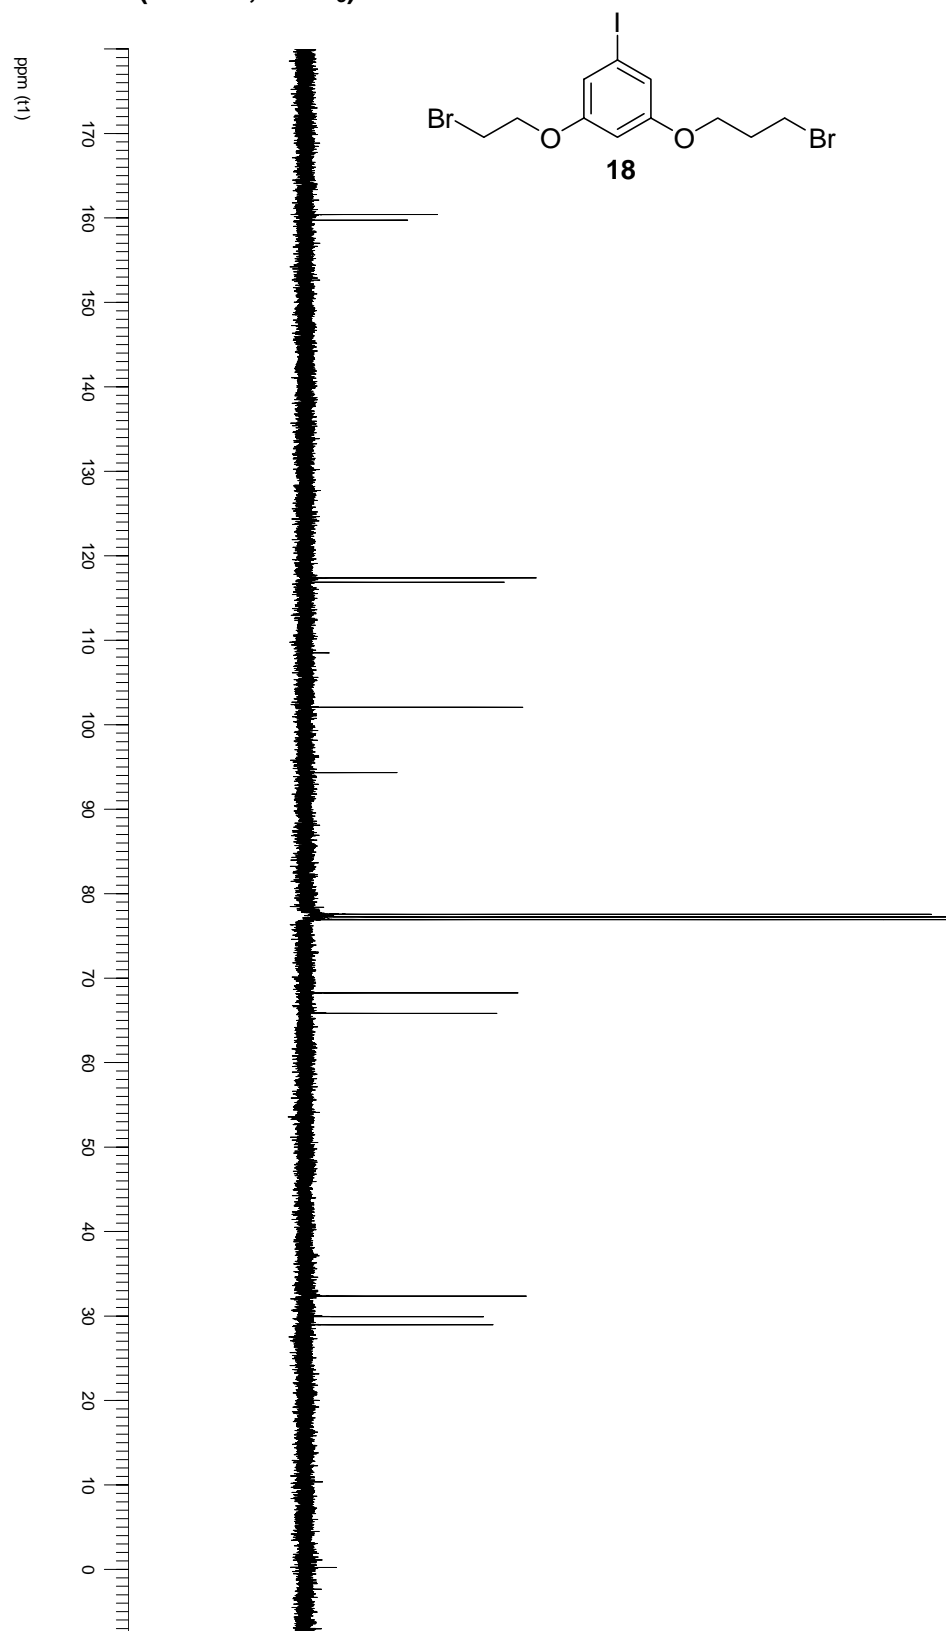



<sup>1</sup>H NMR (300 MHz, CDCl<sub>3</sub>)

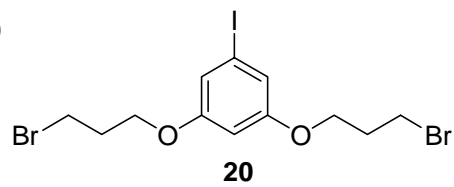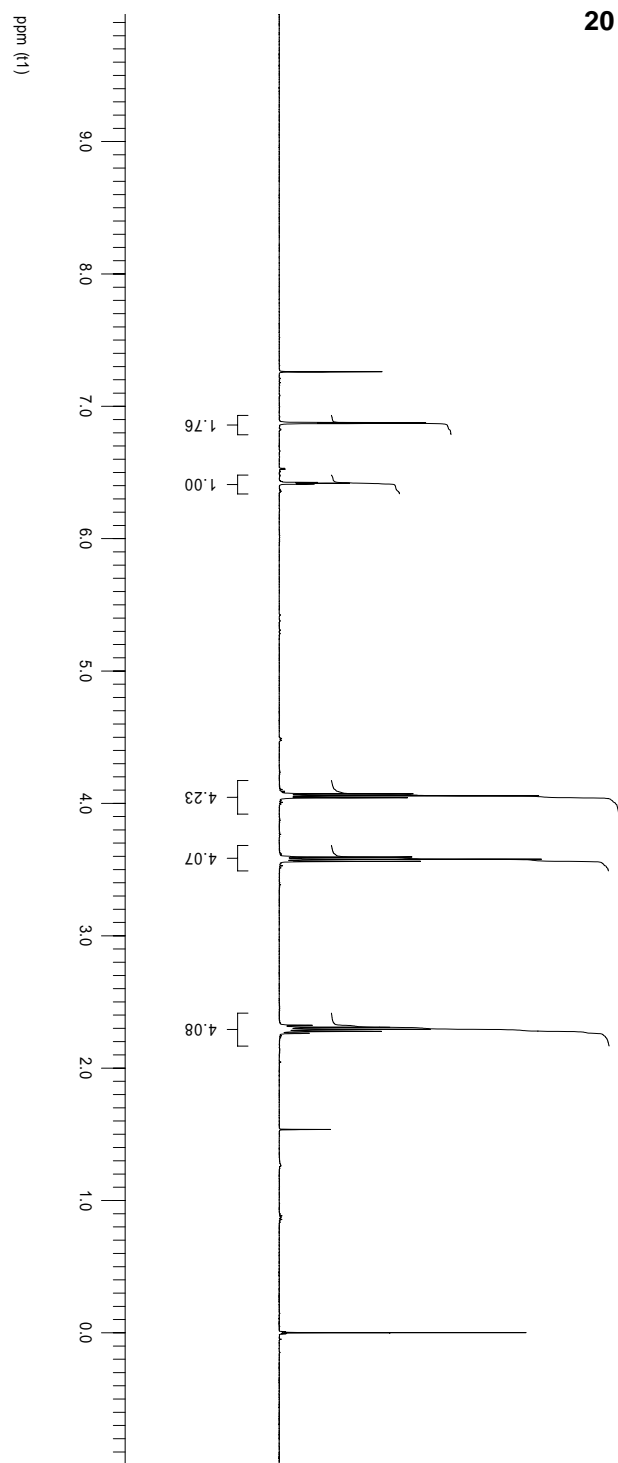

**$^{13}\text{C}$  NMR (75 MHz,  $\text{CDCl}_3$ )**

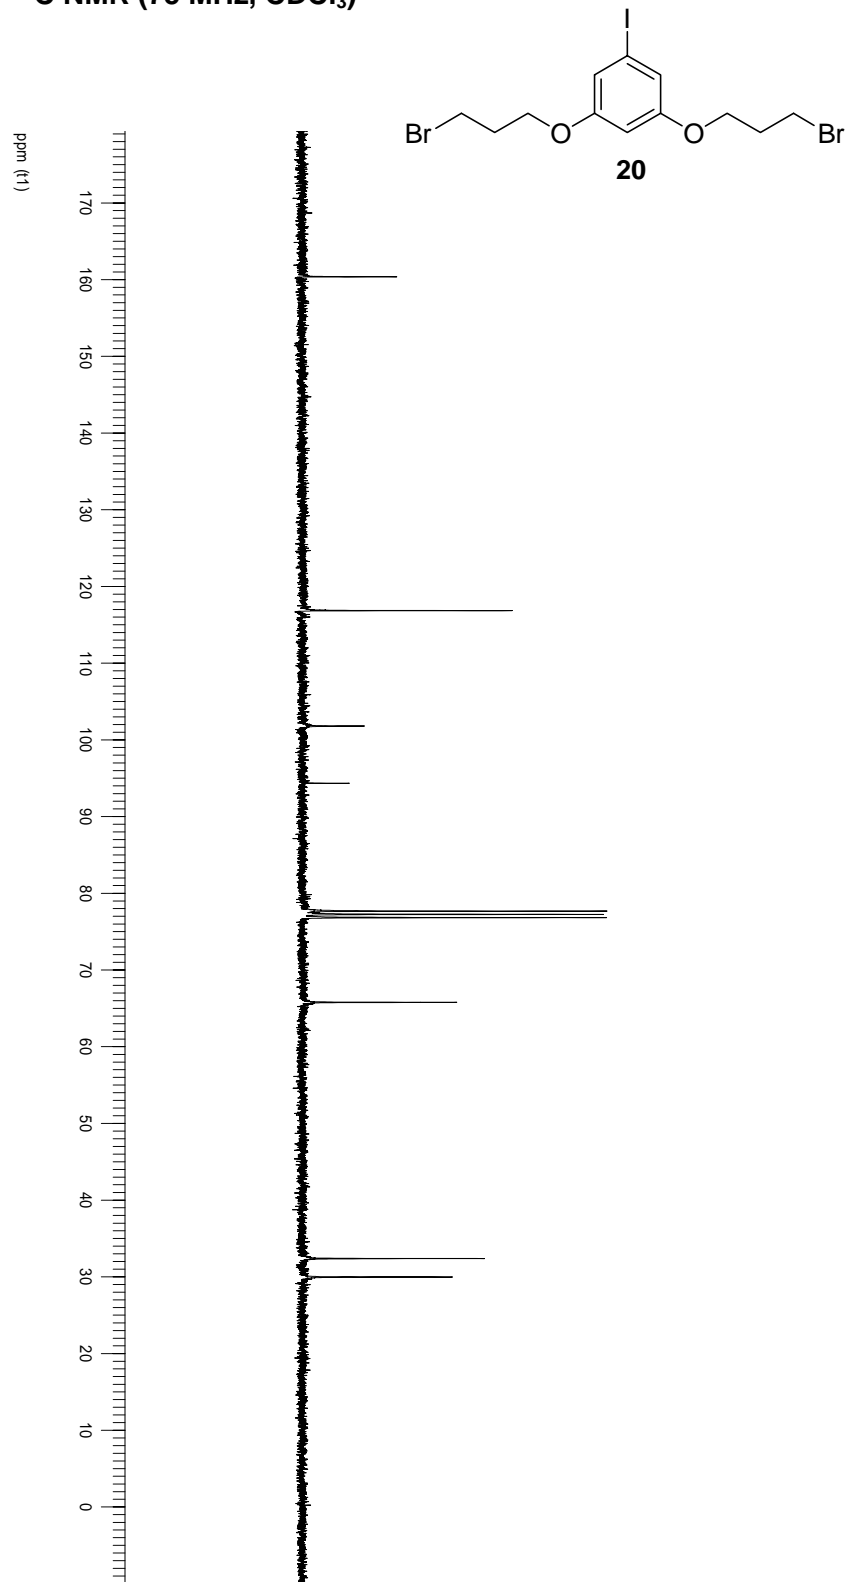

<sup>1</sup>H NMR (300 MHz, CDCl<sub>3</sub>)

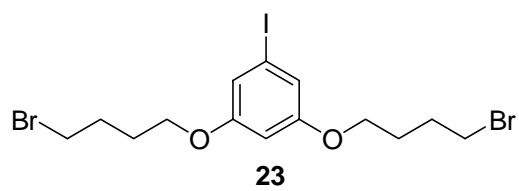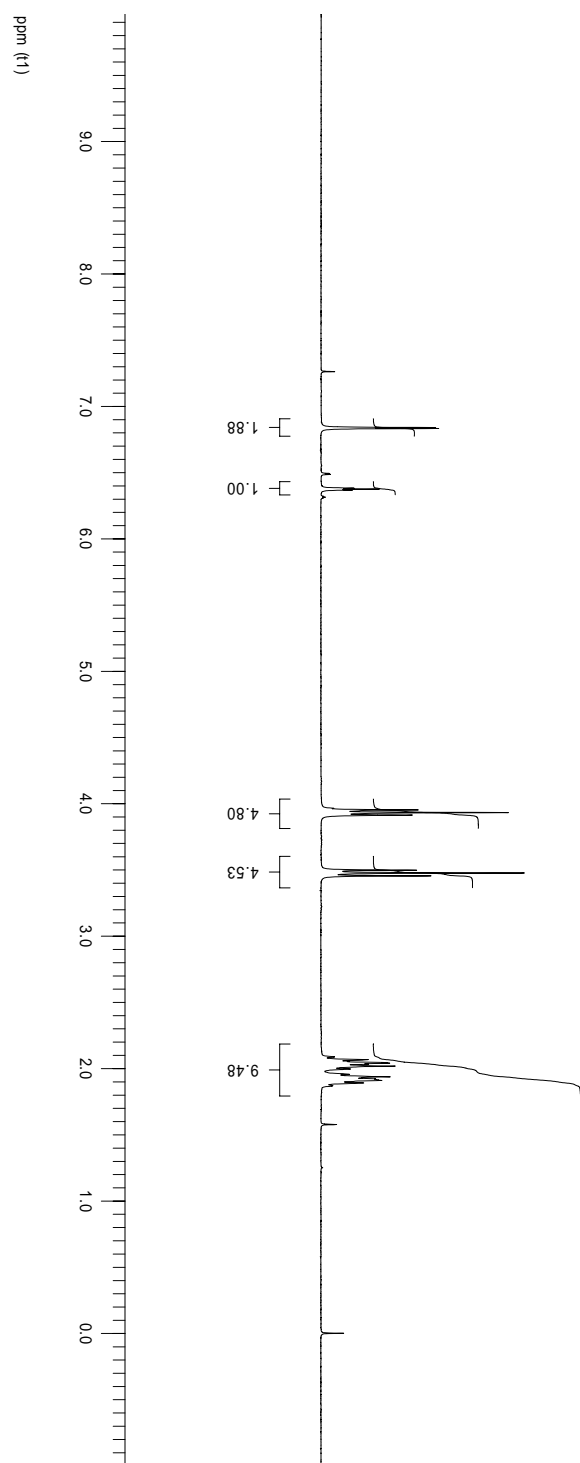

**$^{13}\text{C}$  NMR (75 MHz,  $\text{CDCl}_3$ )**

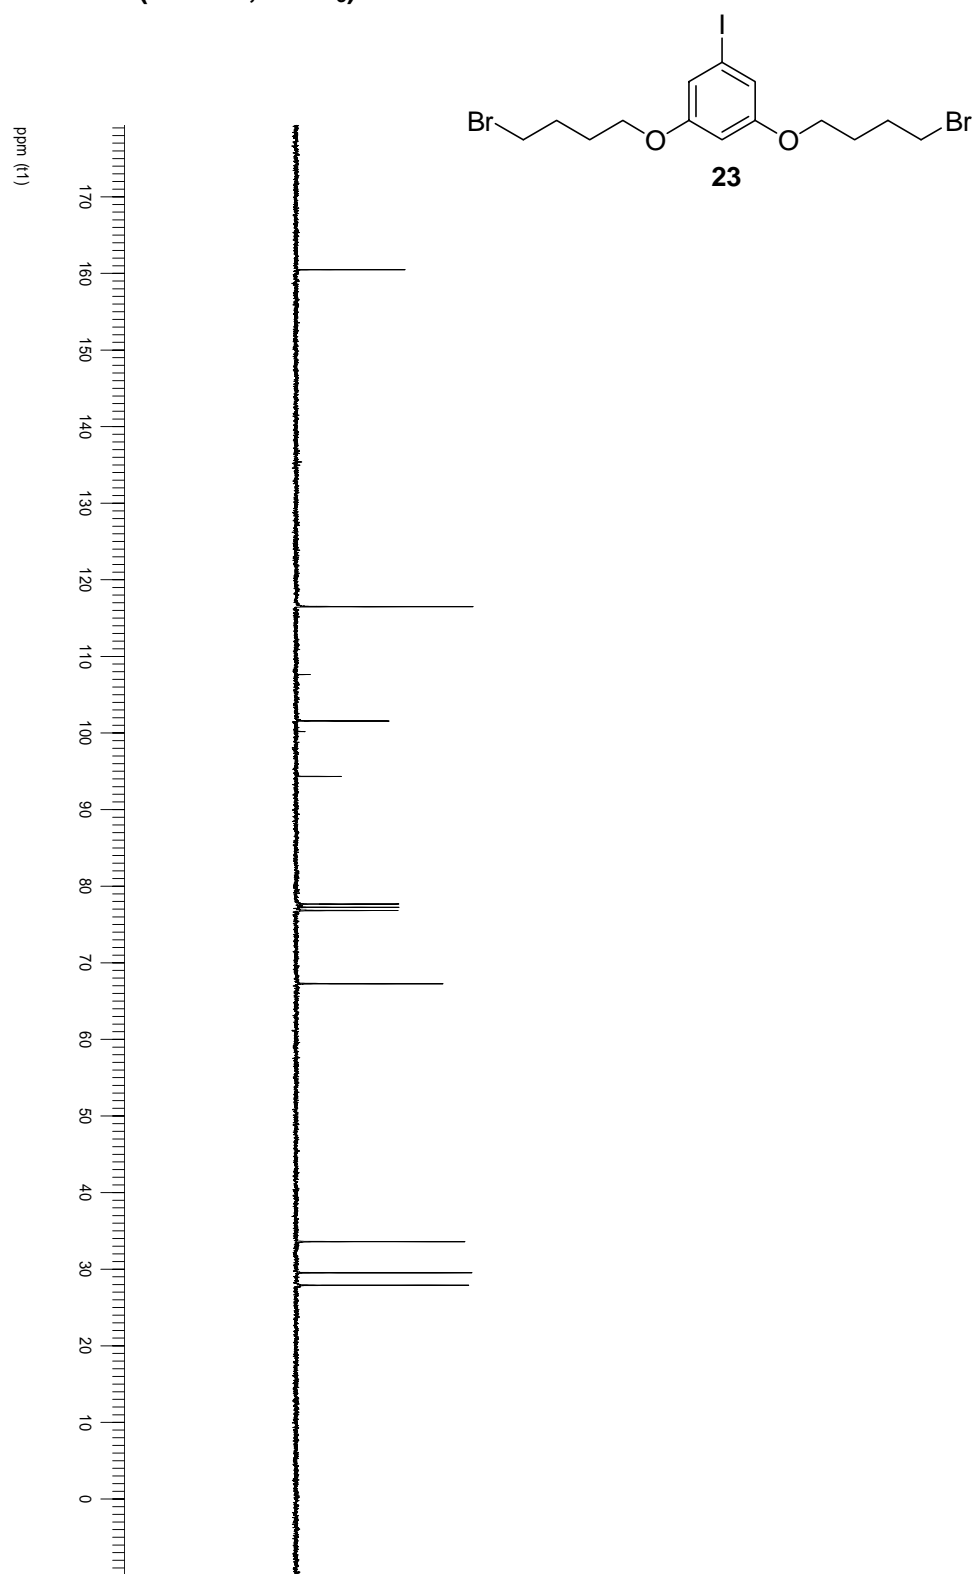

<sup>1</sup>H NMR (400 MHz, CDCl<sub>3</sub>)

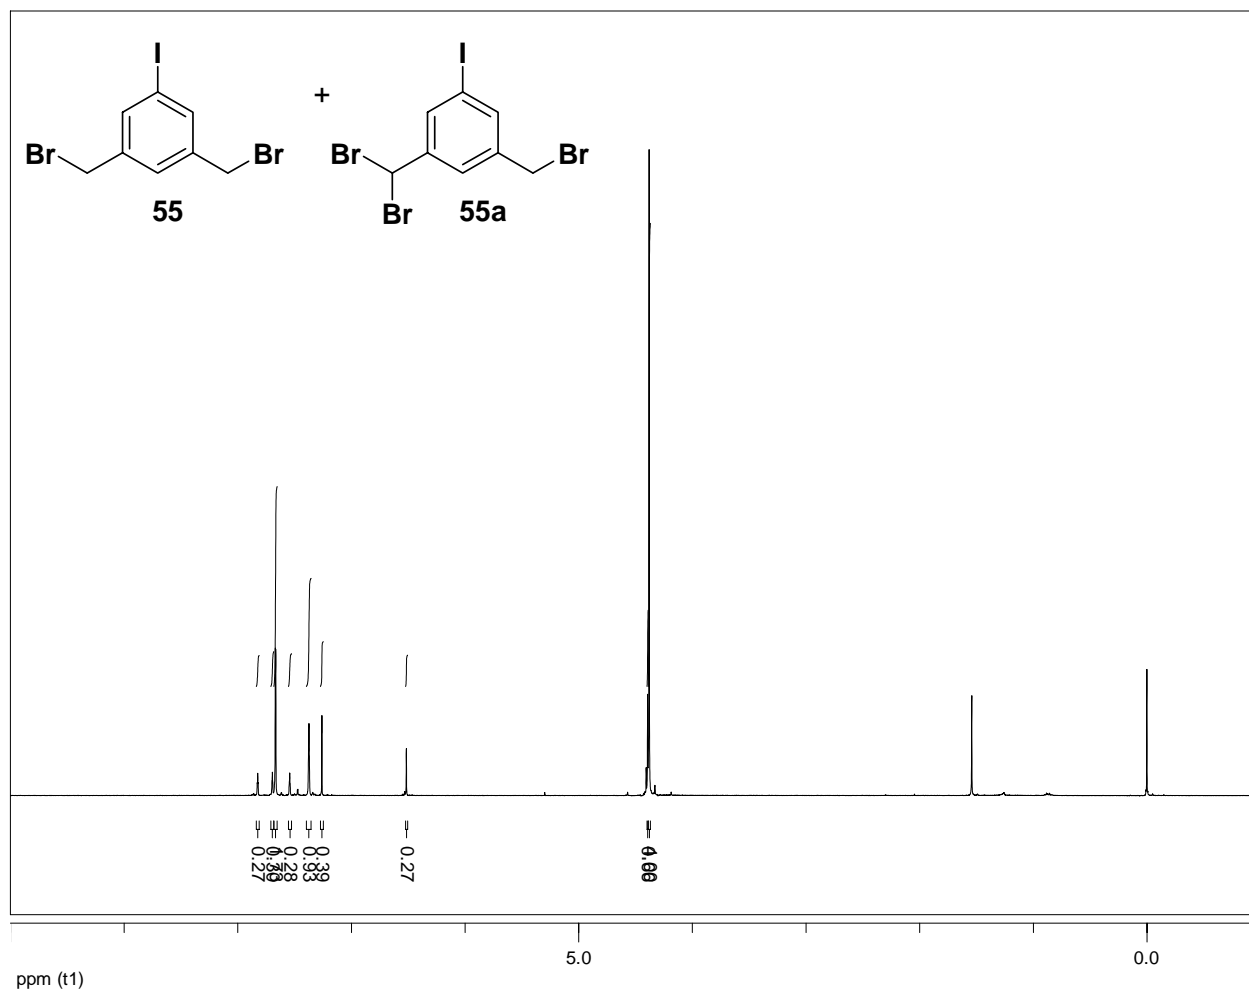

<sup>13</sup>C NMR (100 MHz, CDCl<sub>3</sub>)

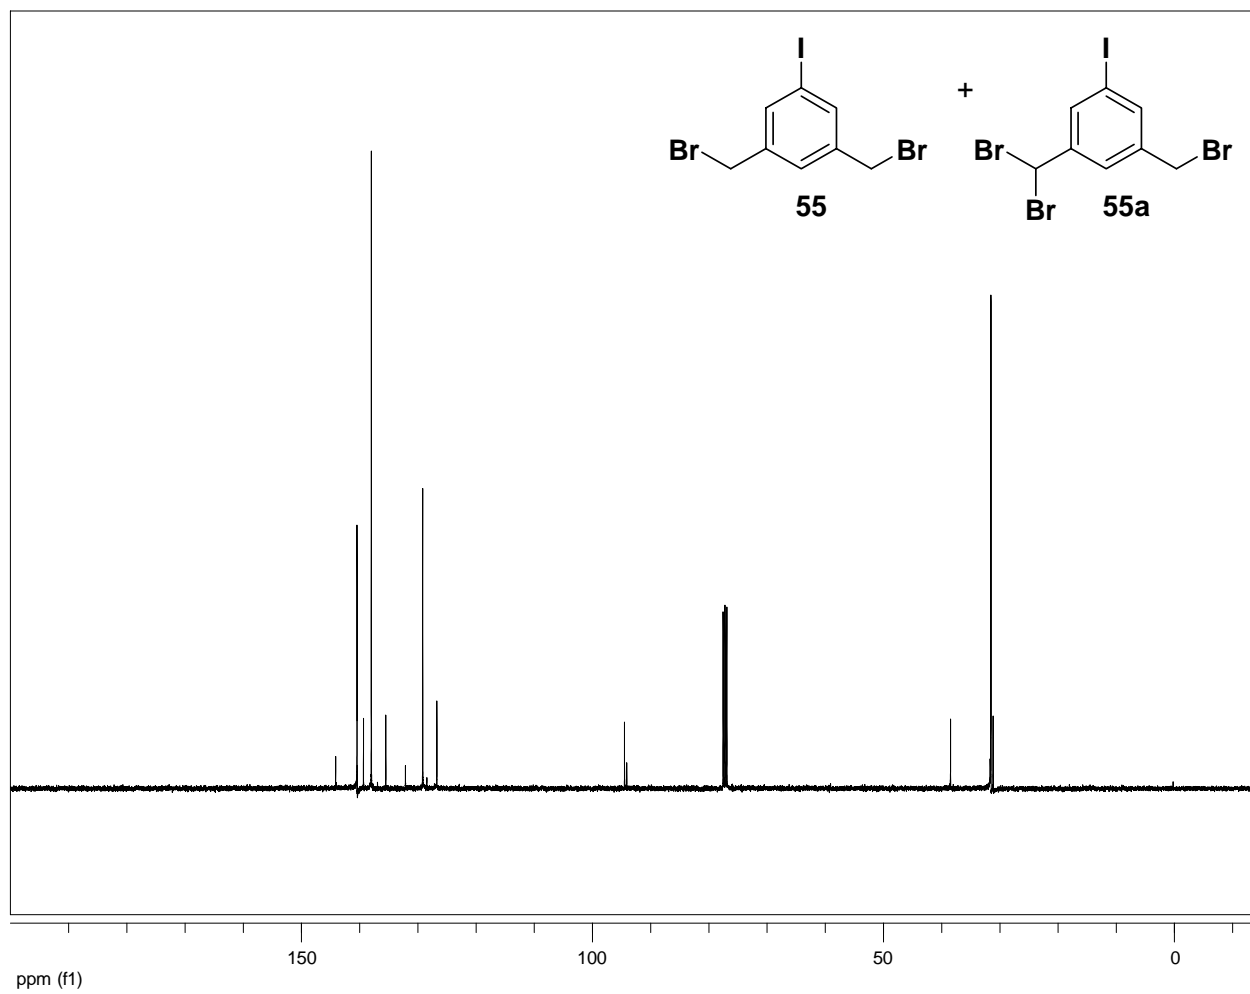

$^1\text{H}$  NMR (300 MHz,  $\text{CDCl}_3$ )

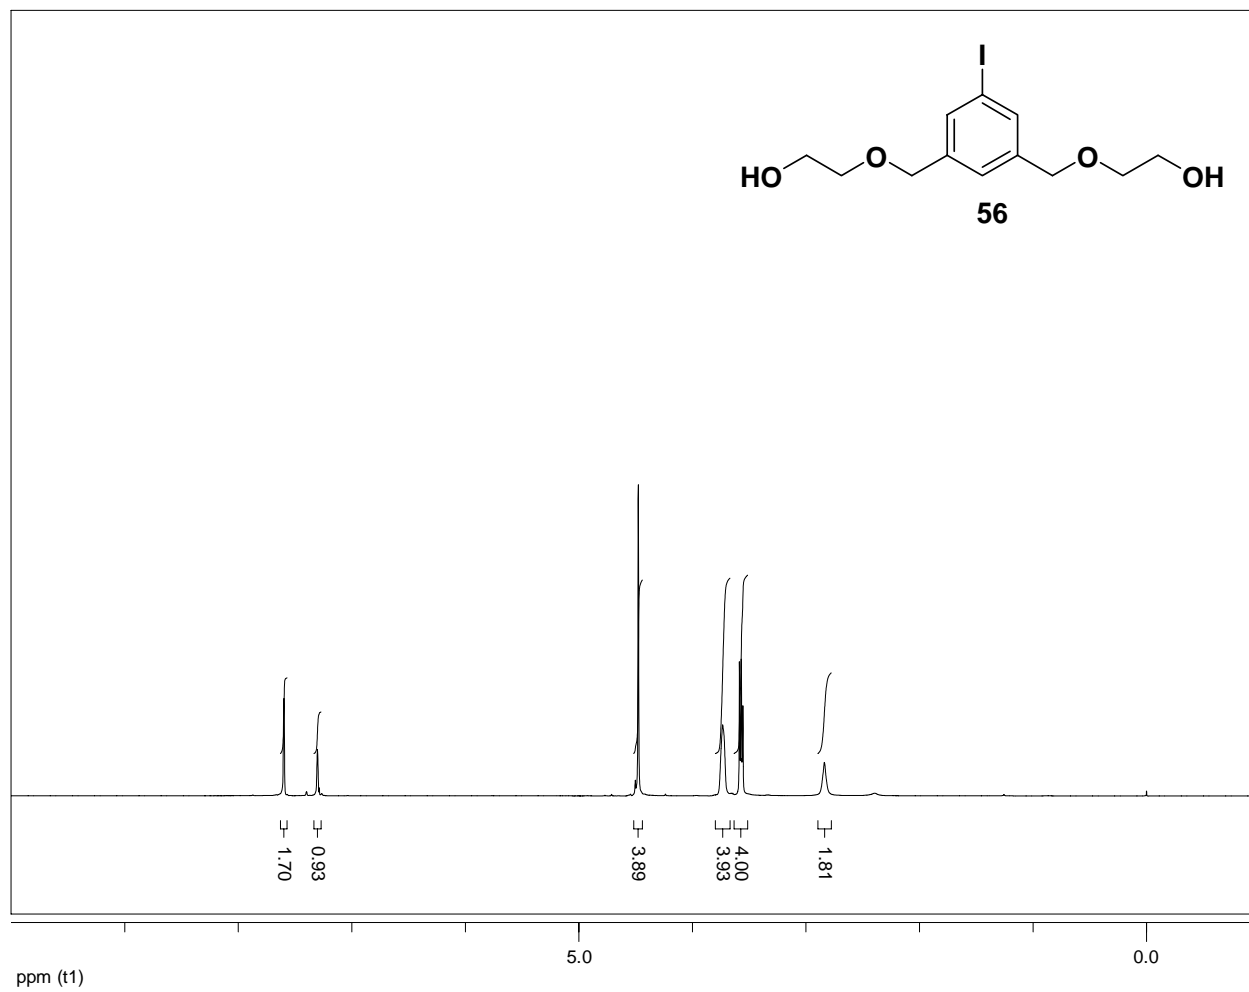

**$^{13}\text{C}$  NMR (100 MHz,  $\text{CDCl}_3$ )**

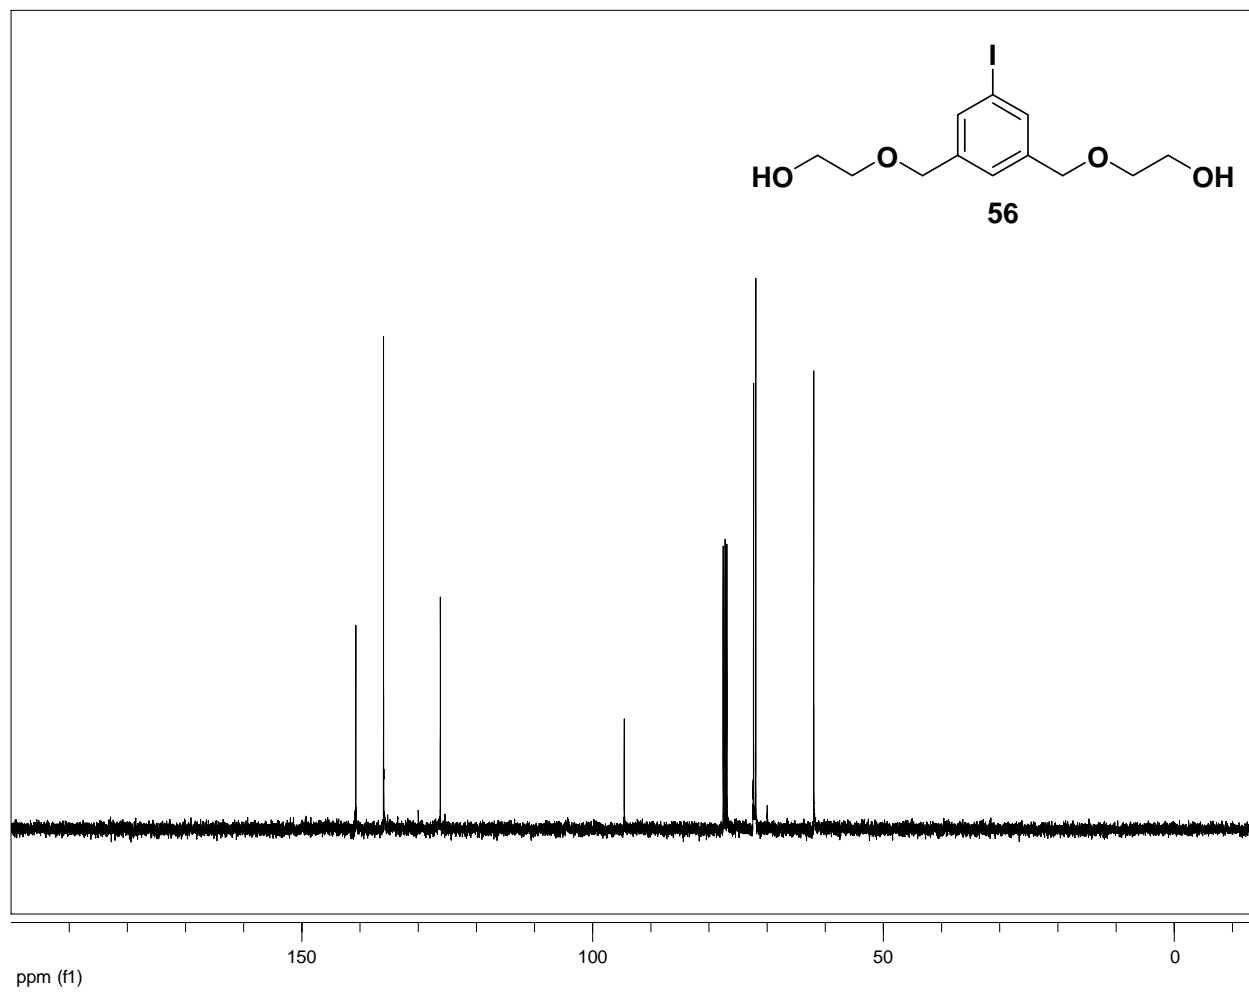



<sup>1</sup>H NMR (400 MHz, CDCl<sub>3</sub>)

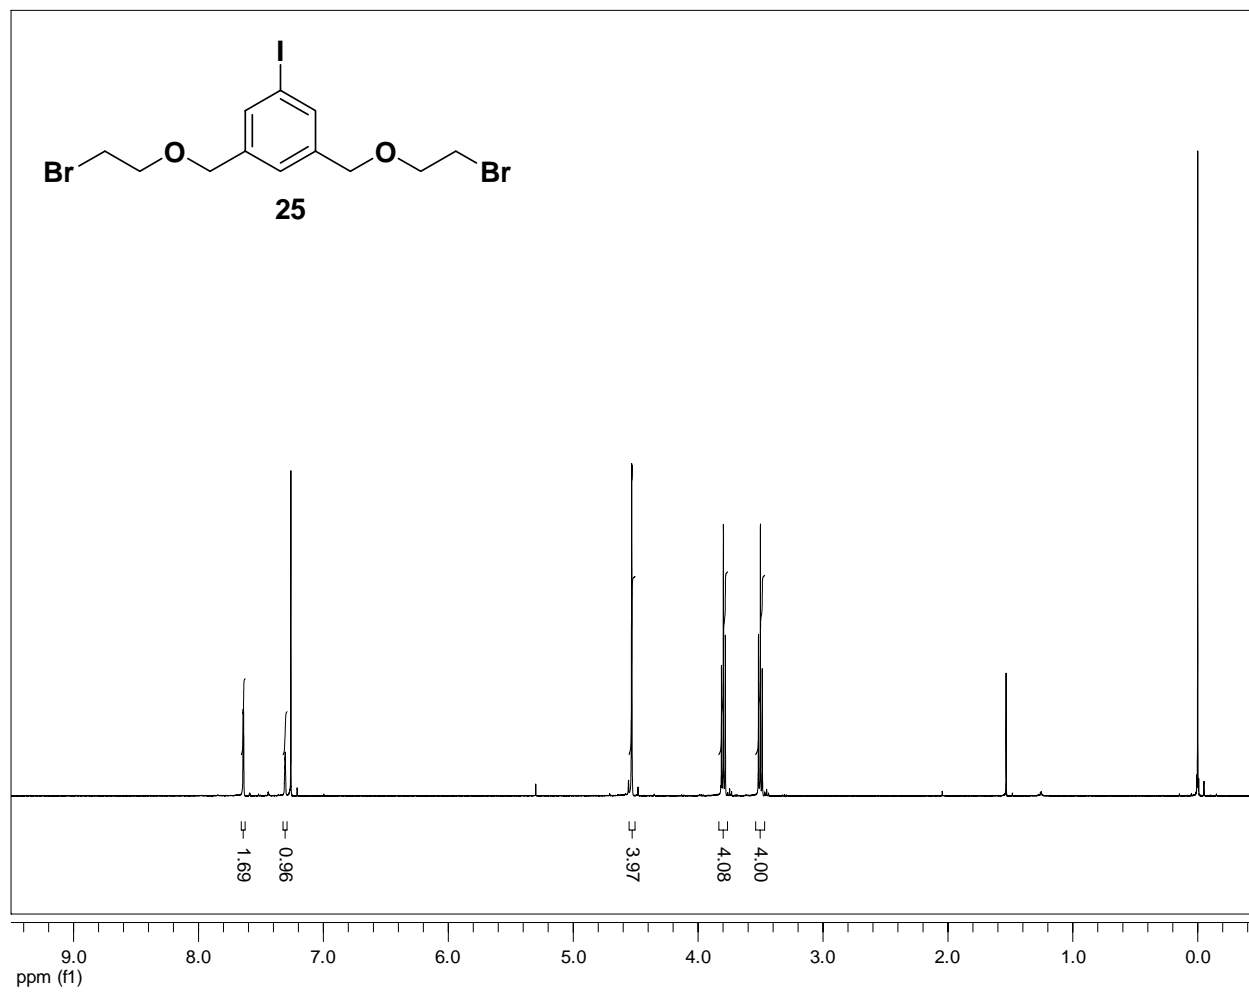

$^{13}\text{C}$  NMR (100 MHz,  $\text{CDCl}_3$ )

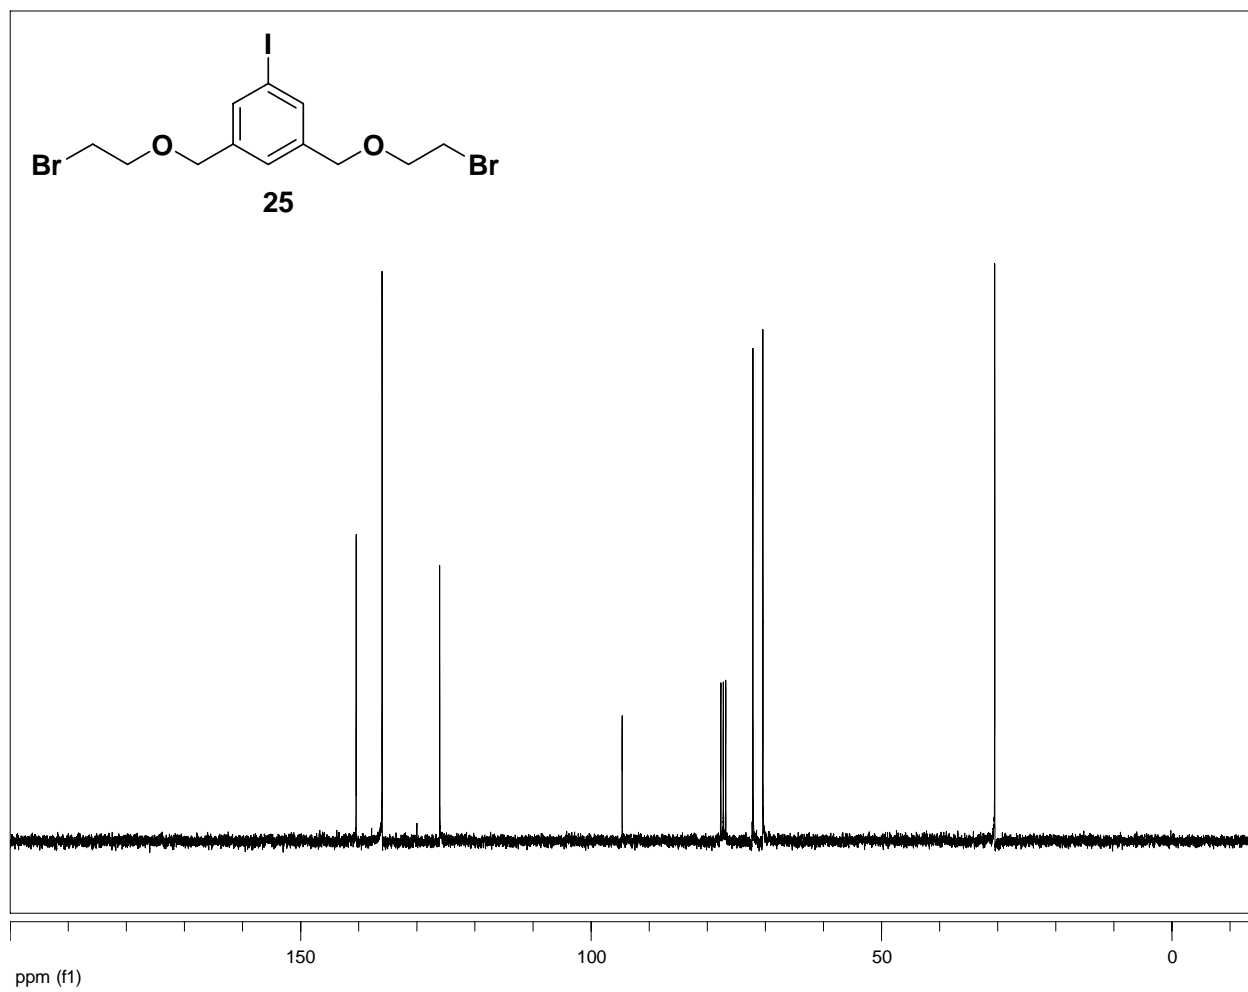

<sup>1</sup>H NMR (300 MHz, CDCl<sub>3</sub>)

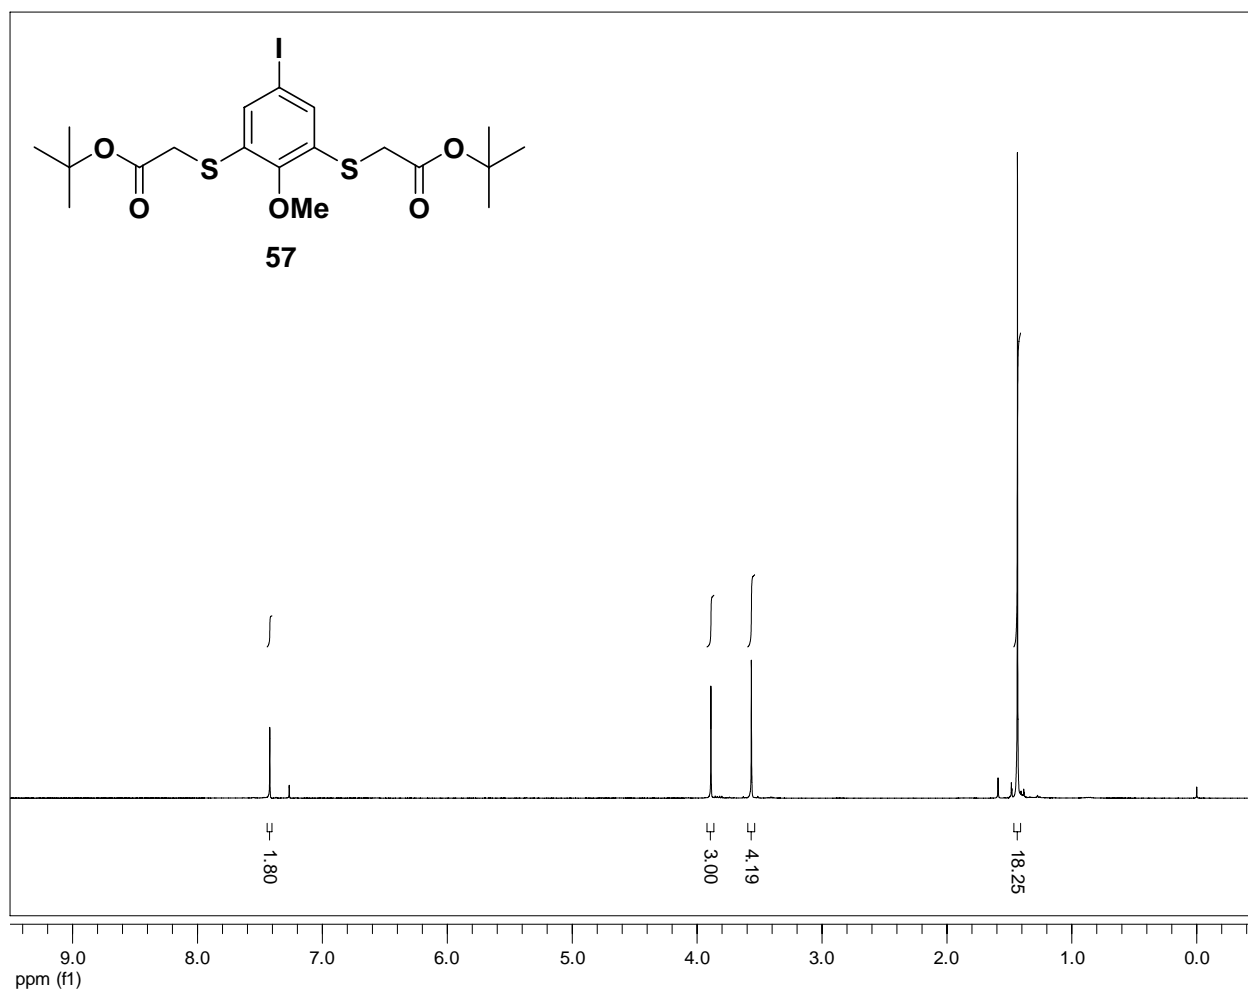

**$^{13}\text{C}$  NMR (100 MHz,  $\text{CDCl}_3$ )**

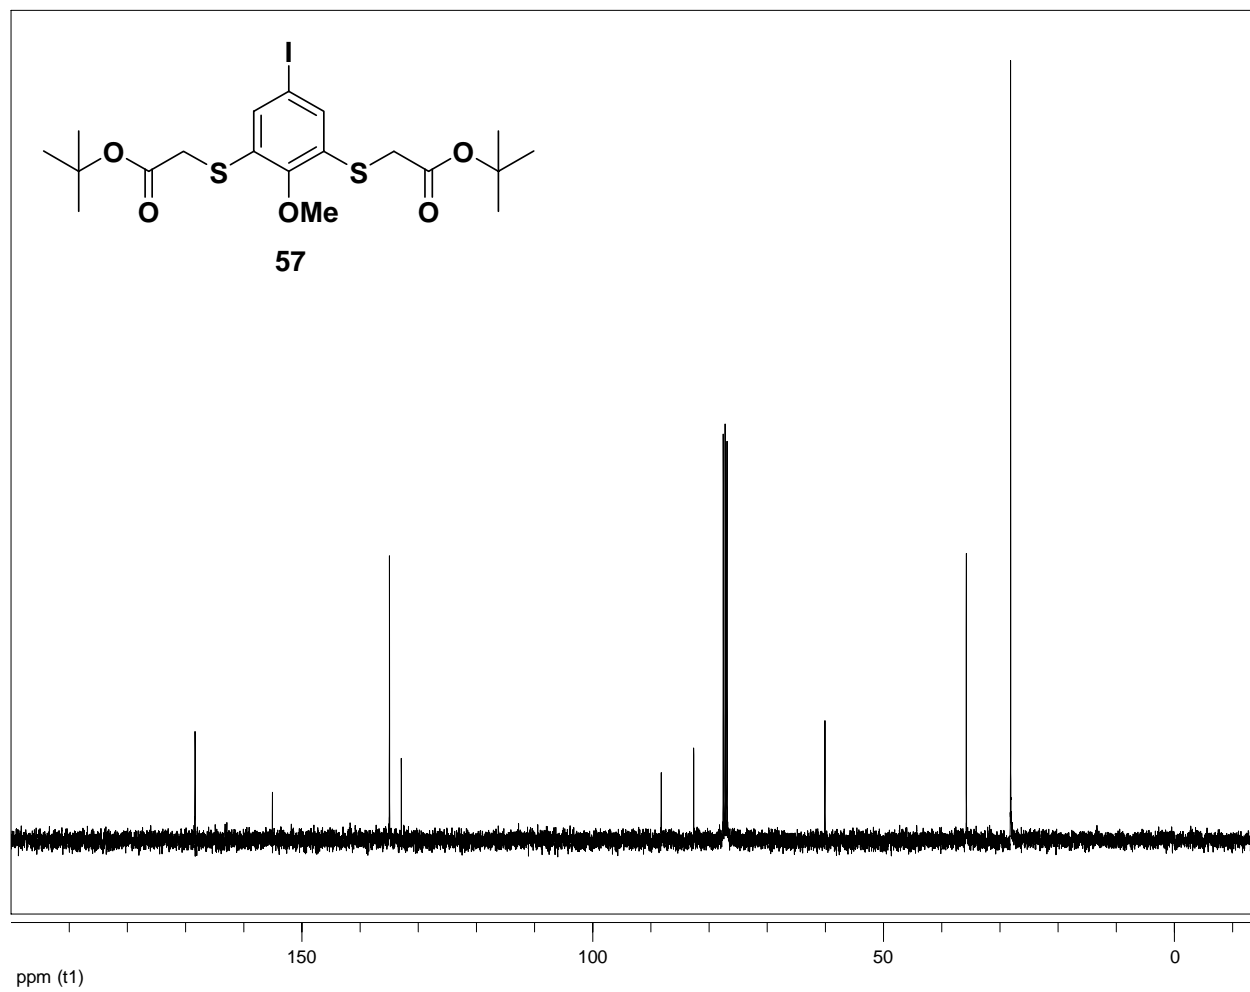

<sup>1</sup>H NMR (400 MHz, CDCl<sub>3</sub>)

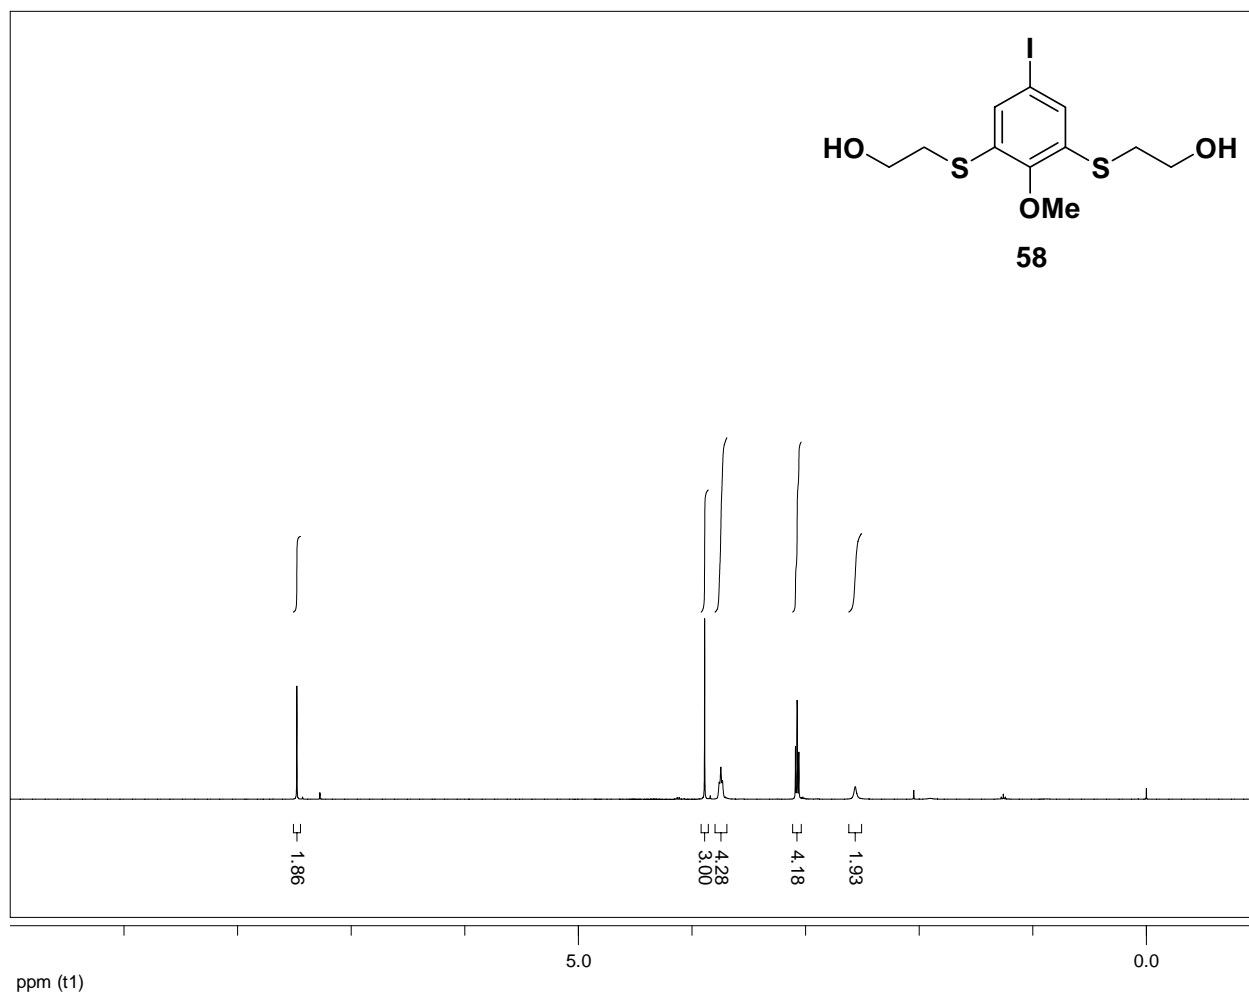

**$^{13}\text{C}$  NMR (100 MHz,  $\text{CDCl}_3$ )**

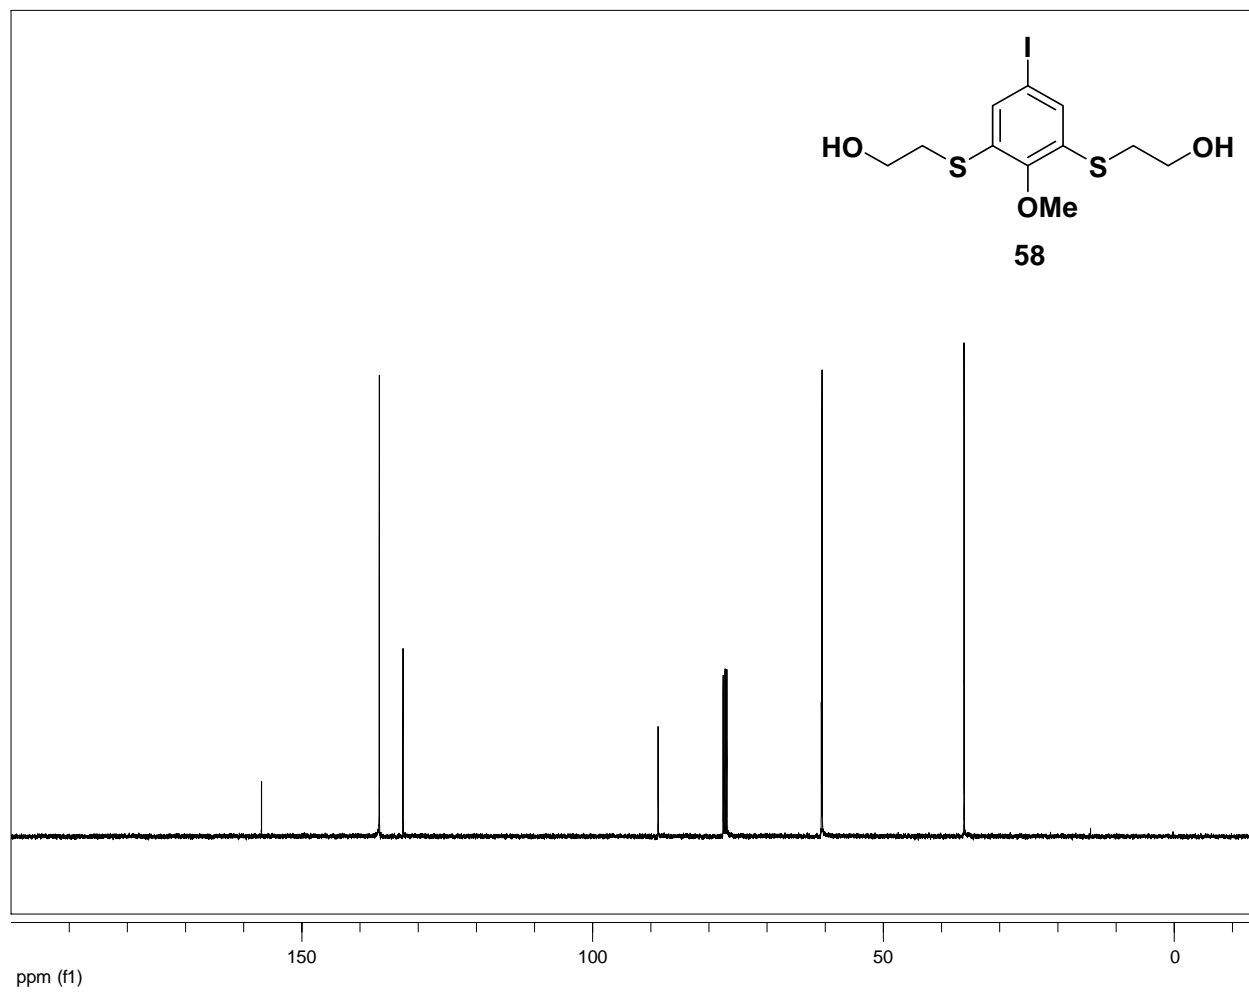

<sup>1</sup>H NMR (300 MHz, CDCl<sub>3</sub>)

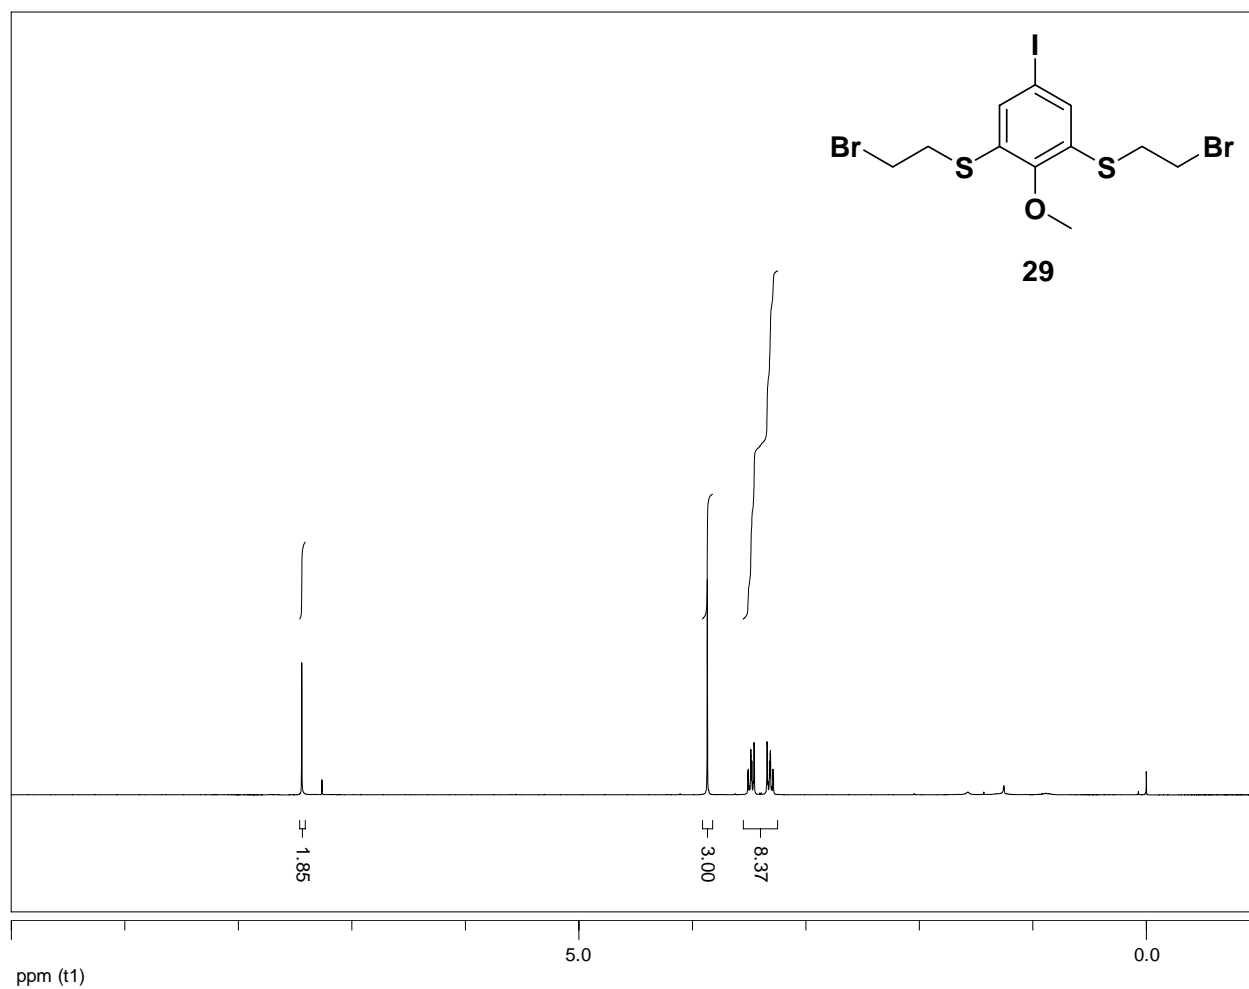

**$^{13}\text{C}$  NMR (100 MHz,  $\text{CDCl}_3$ )**

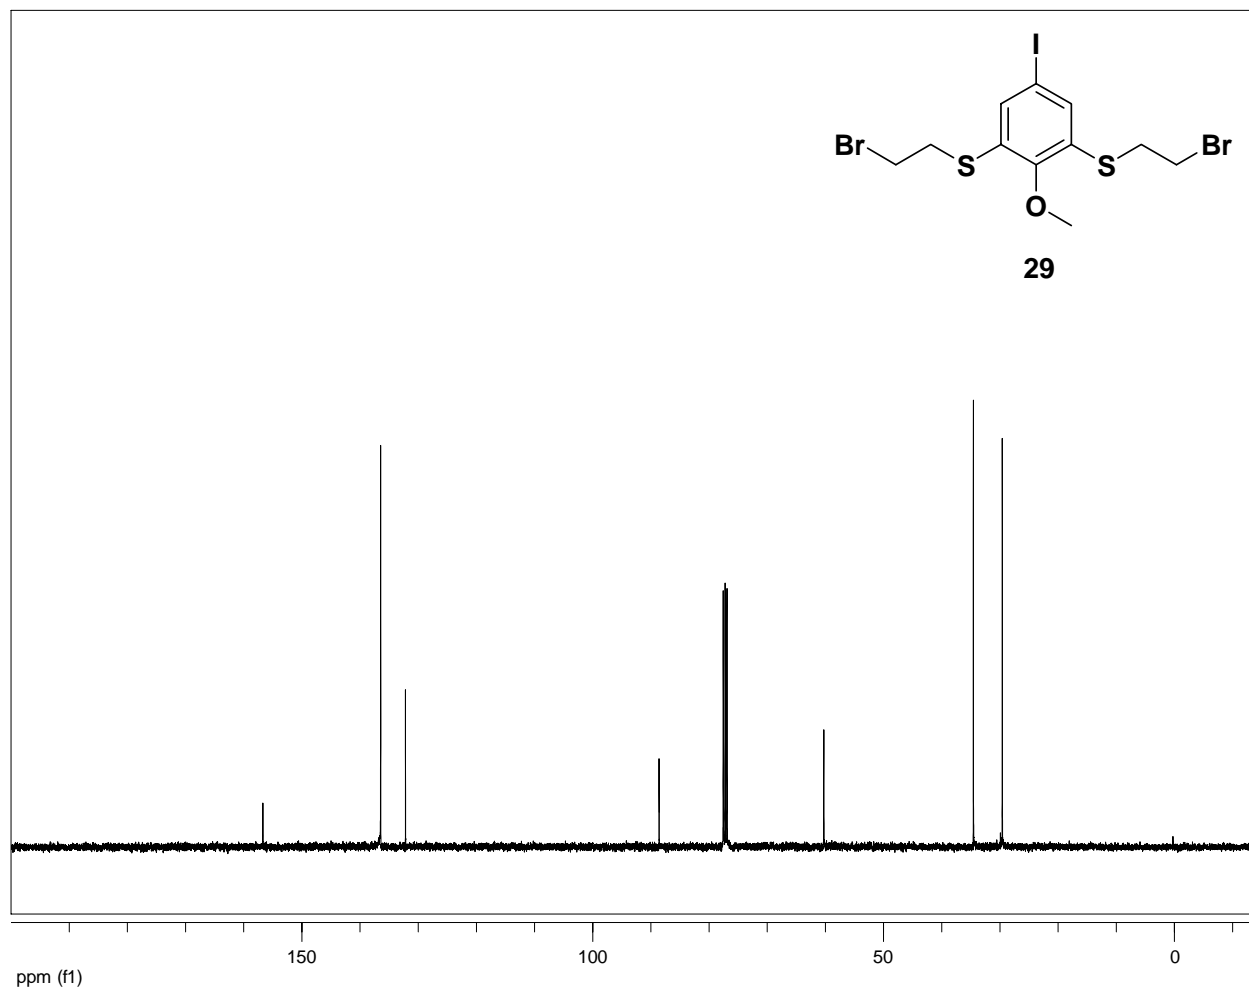



<sup>1</sup>H NMR (400 MHz, CDCl<sub>3</sub>)

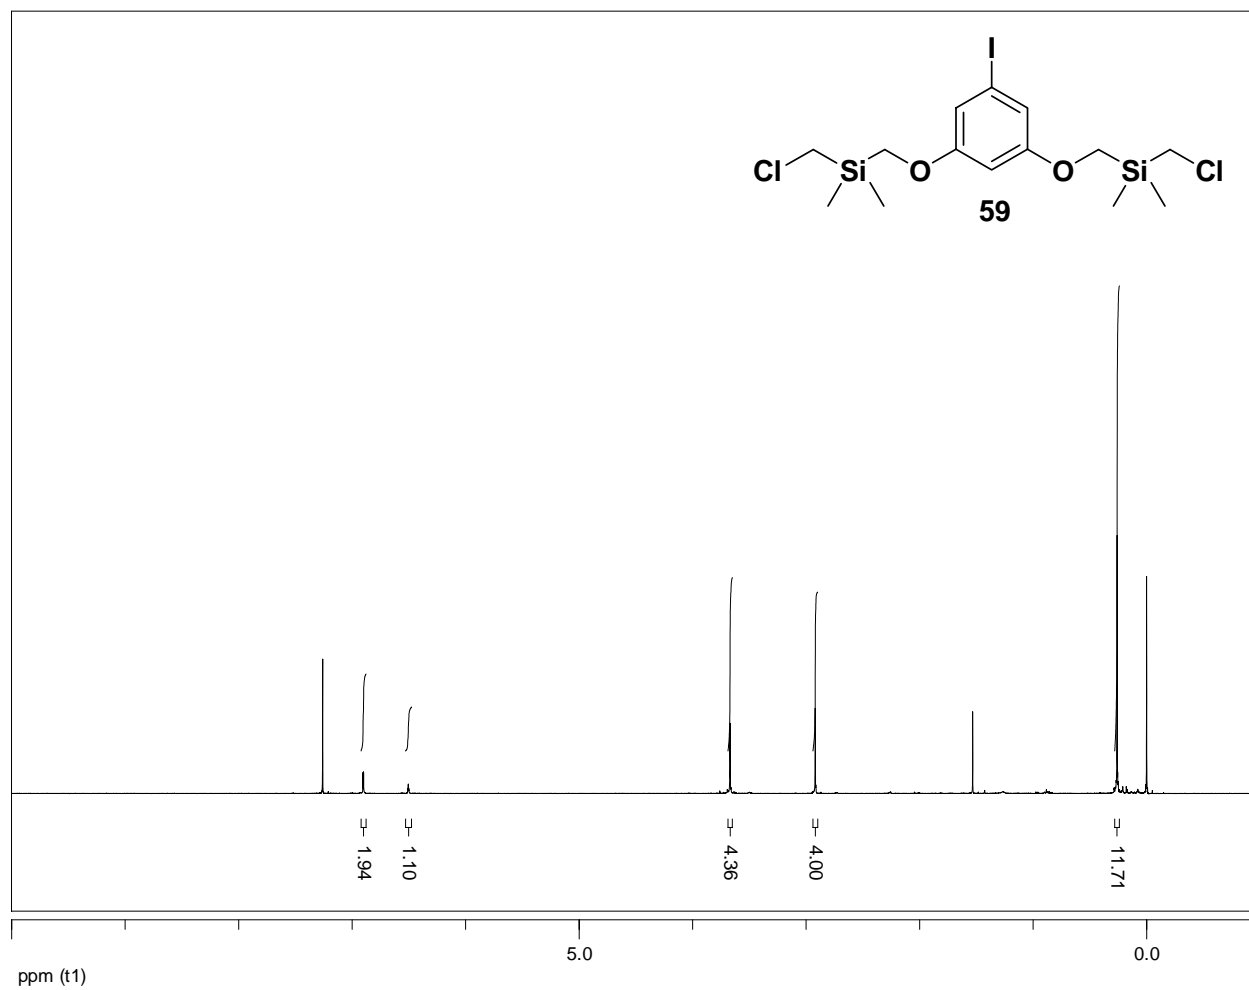

**$^{13}\text{C}$  NMR (100 MHz,  $\text{CDCl}_3$ )**

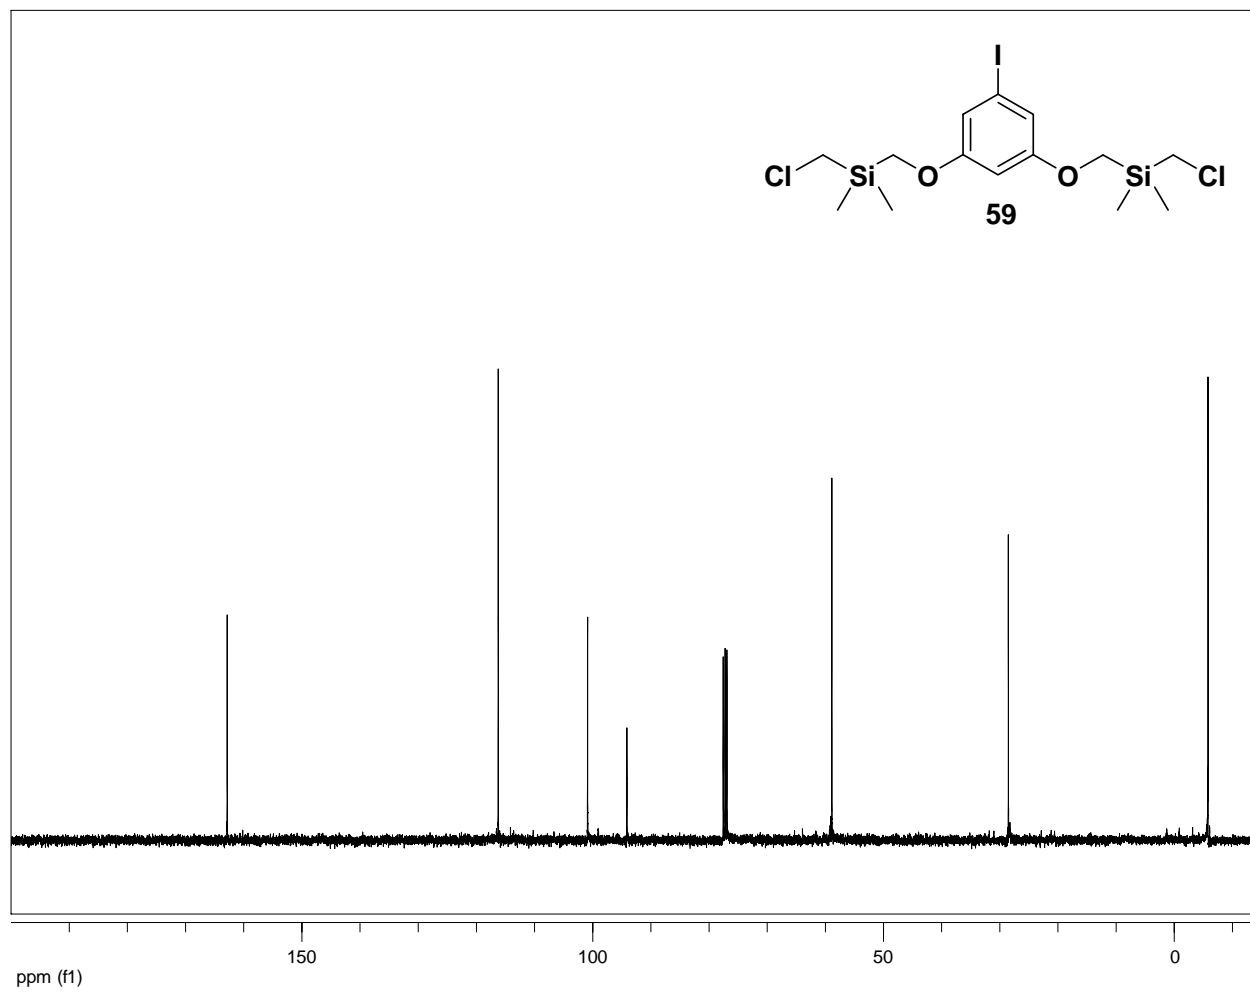

<sup>1</sup>H NMR (400 MHz, CDCl<sub>3</sub>)

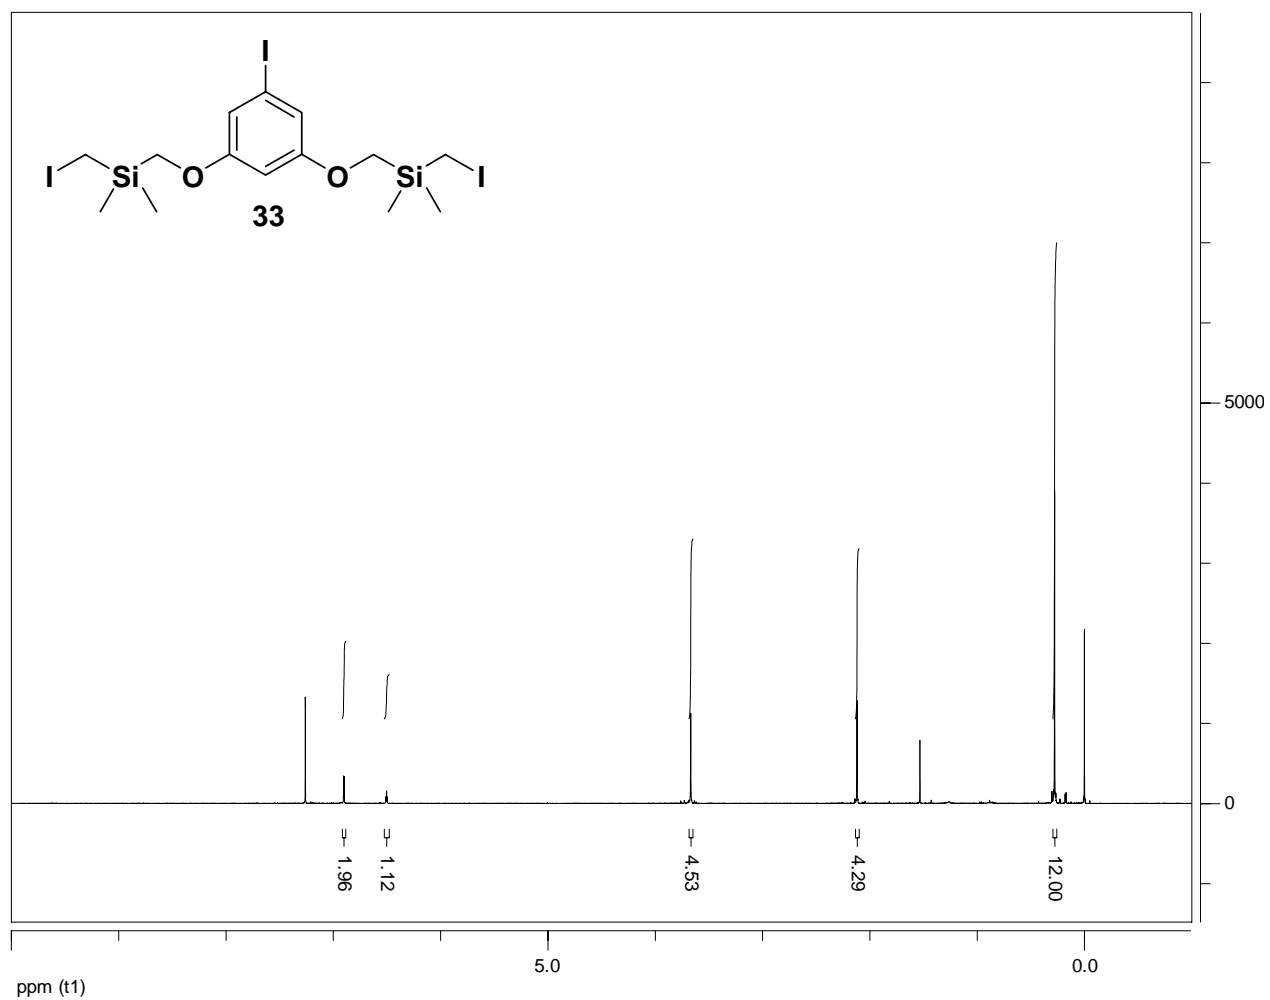

<sup>13</sup>C NMR (100 MHz, CDCl<sub>3</sub>)

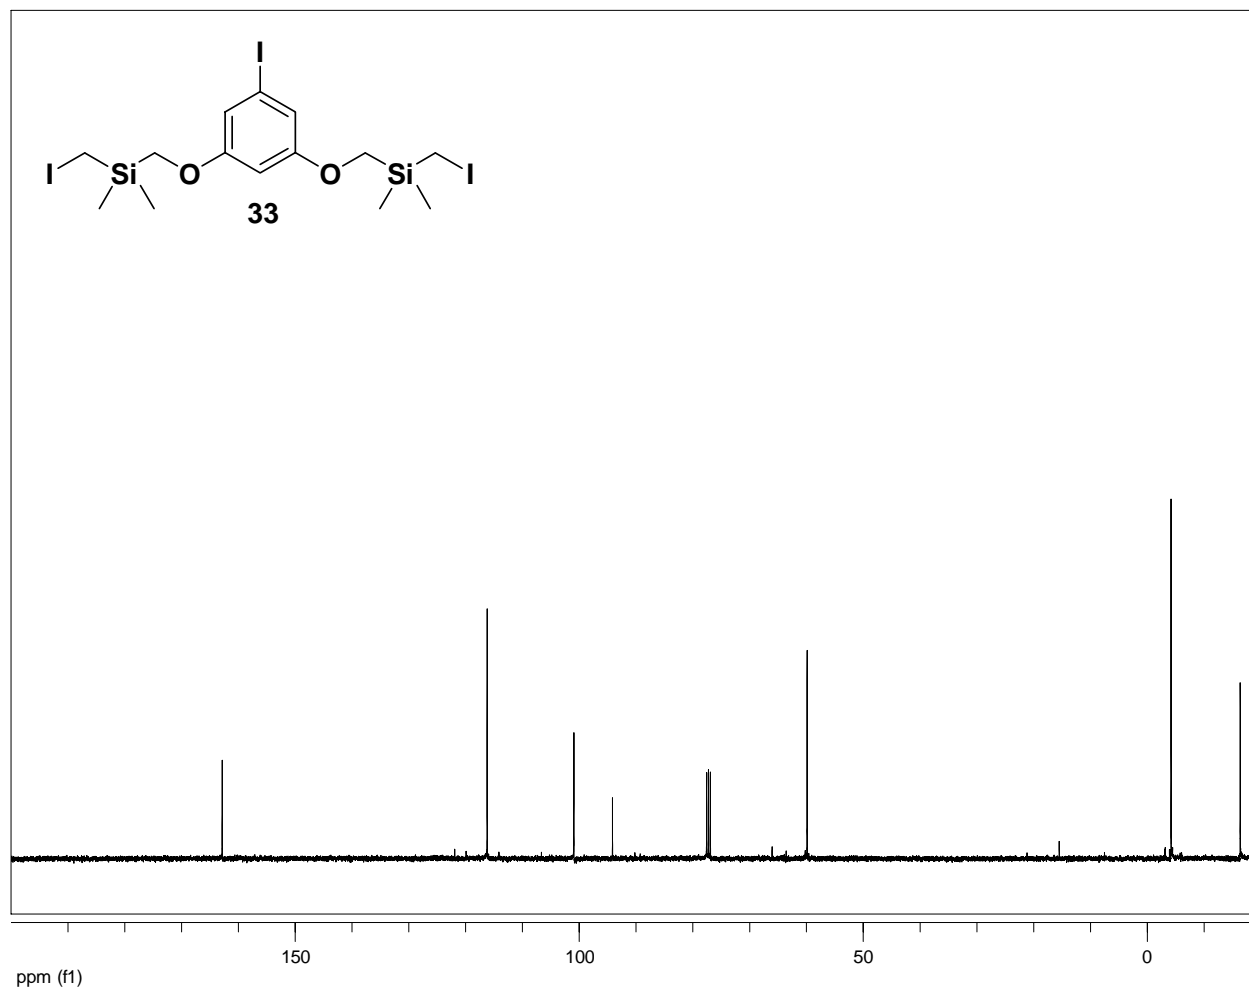

<sup>1</sup>H NMR (300 MHz, CDCl<sub>3</sub>)

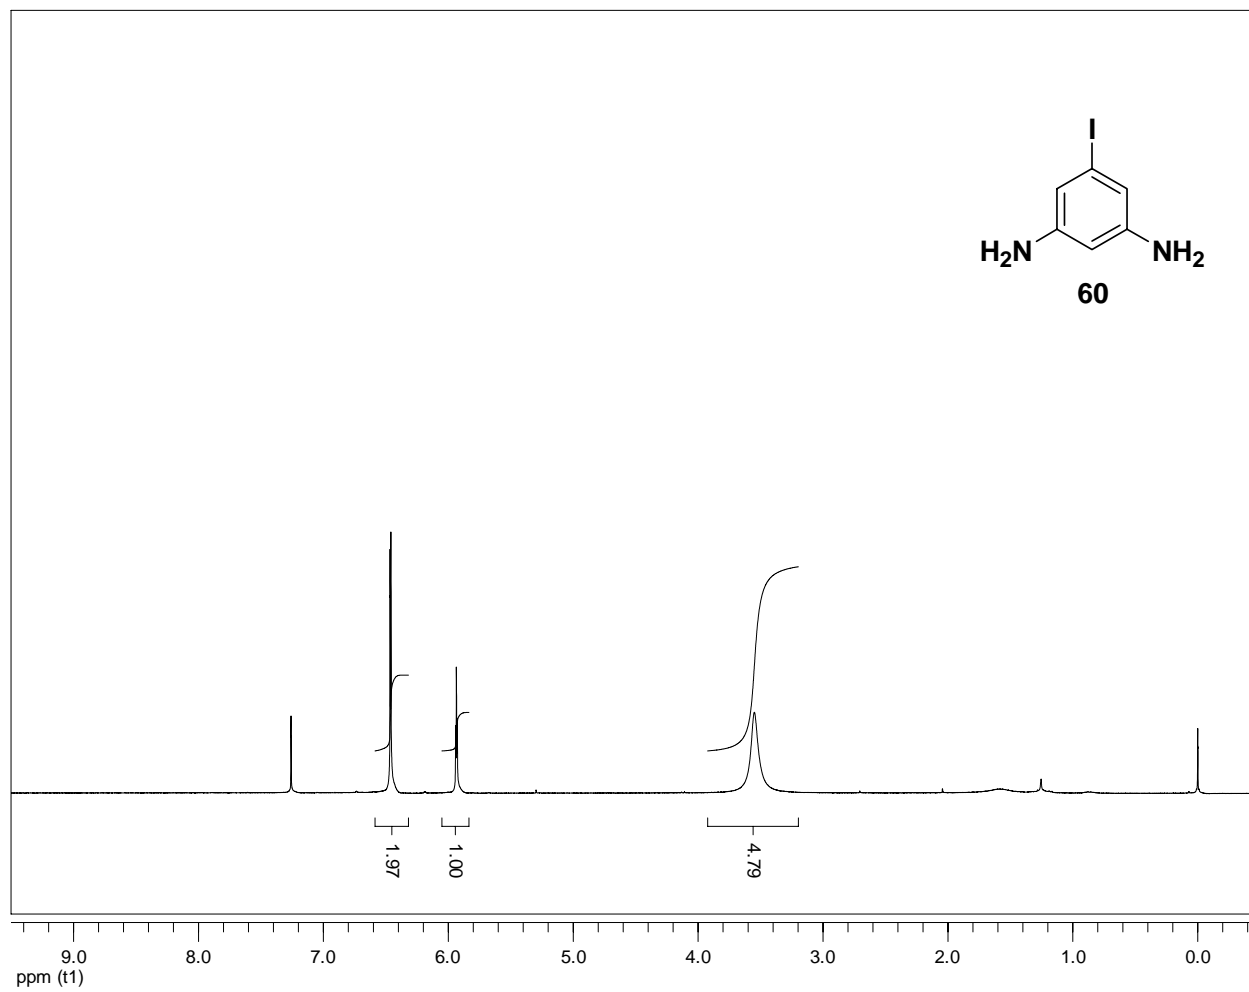

**$^{13}\text{C}$  NMR (100 MHz,  $\text{CDCl}_3$ )**

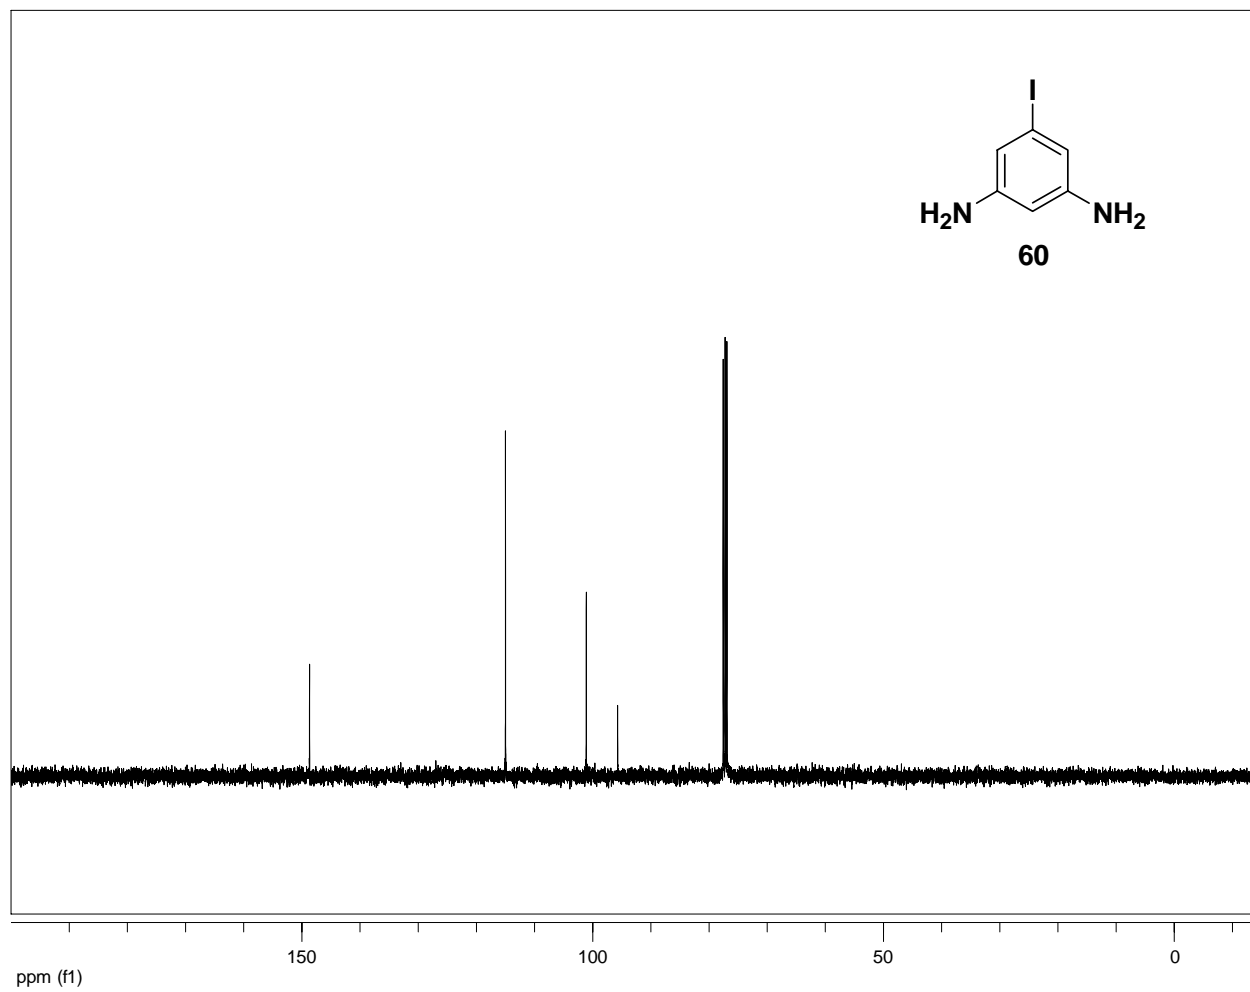

<sup>1</sup>H NMR (400 MHz, DMSO)

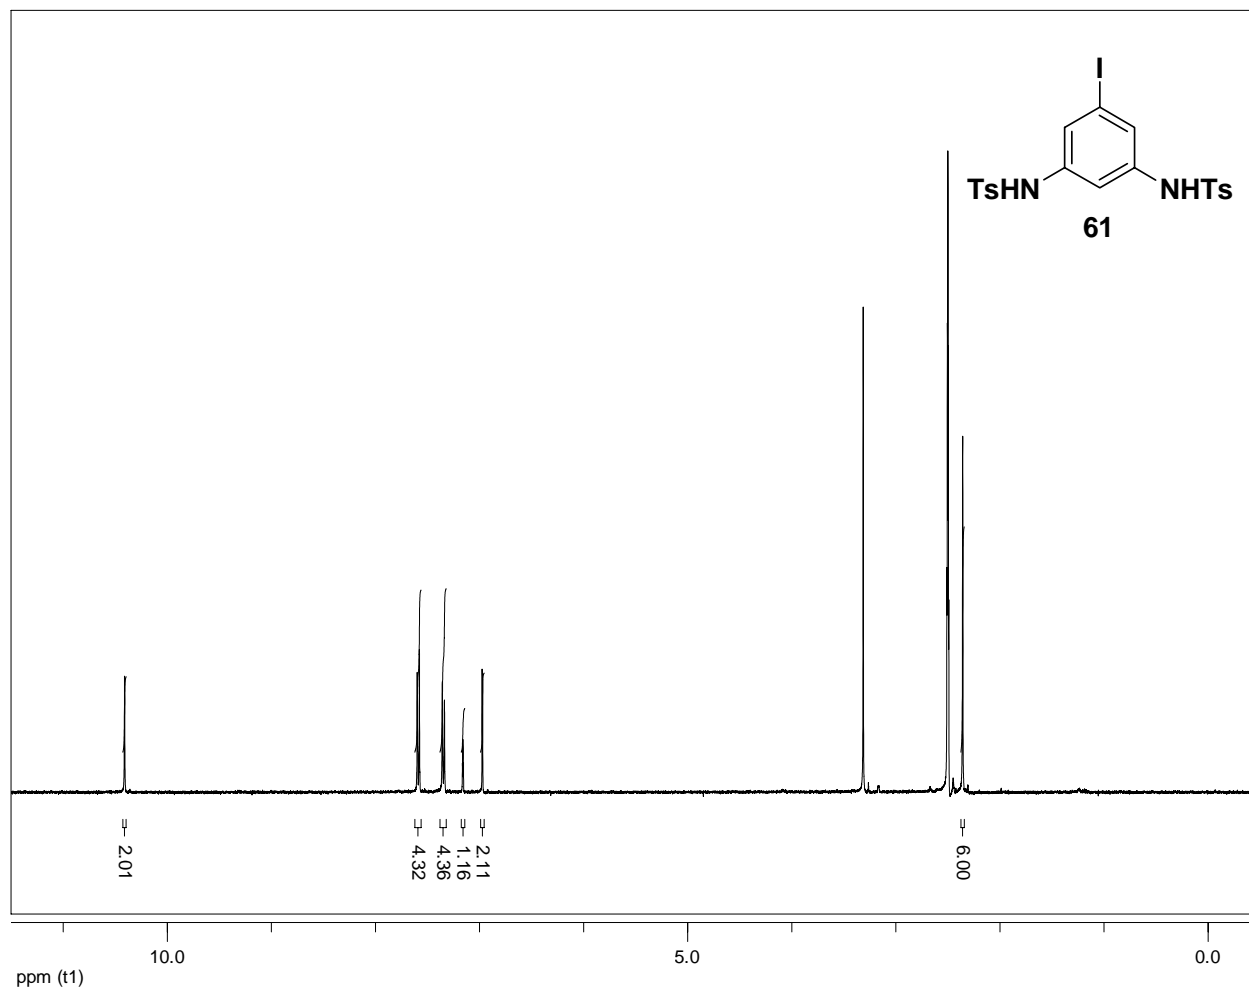

<sup>13</sup>C NMR (100 MHz, DMSO)

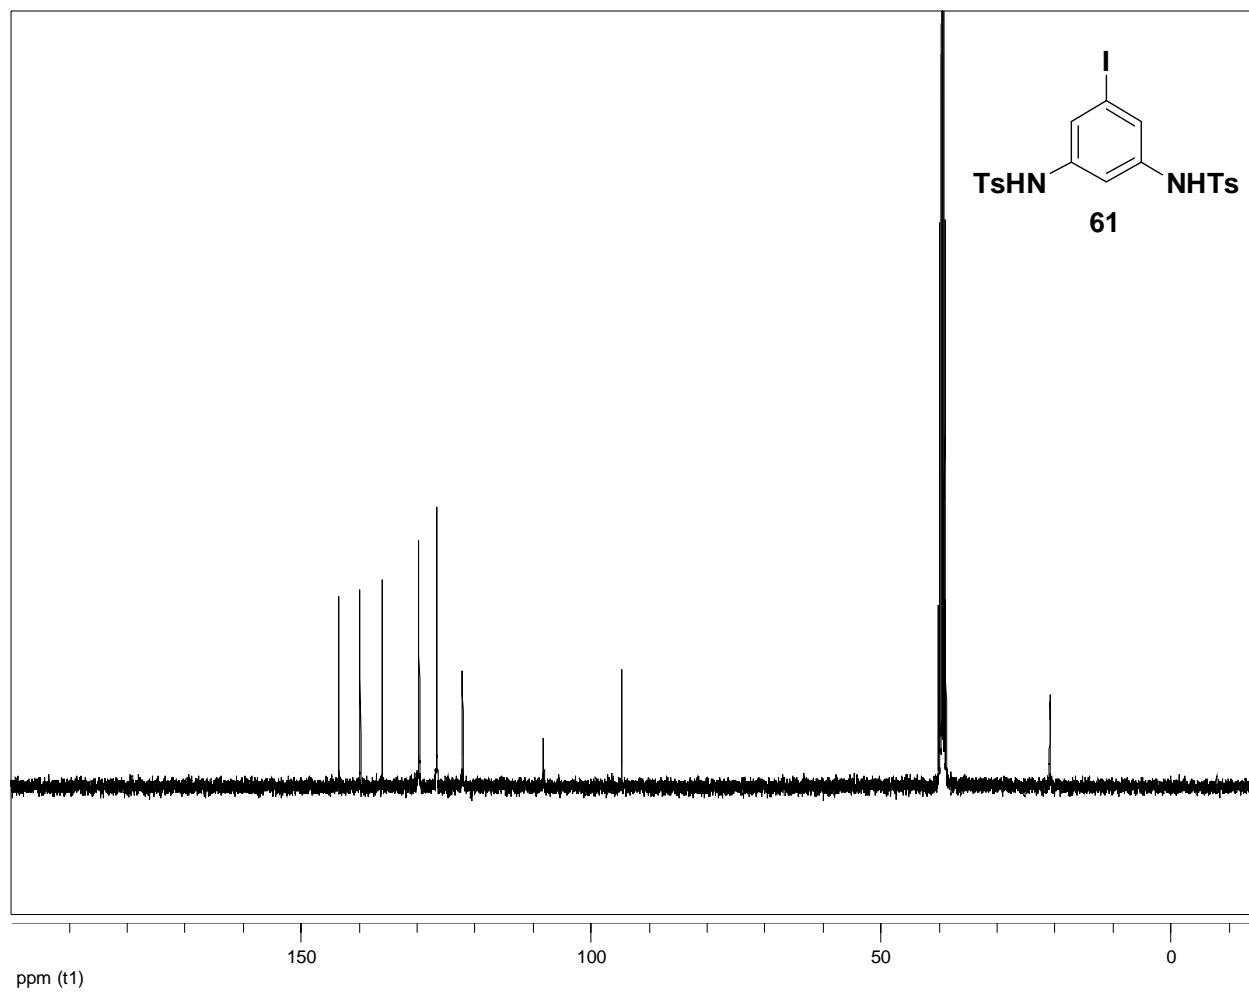



<sup>1</sup>H NMR (300 MHz, CDCl<sub>3</sub>)

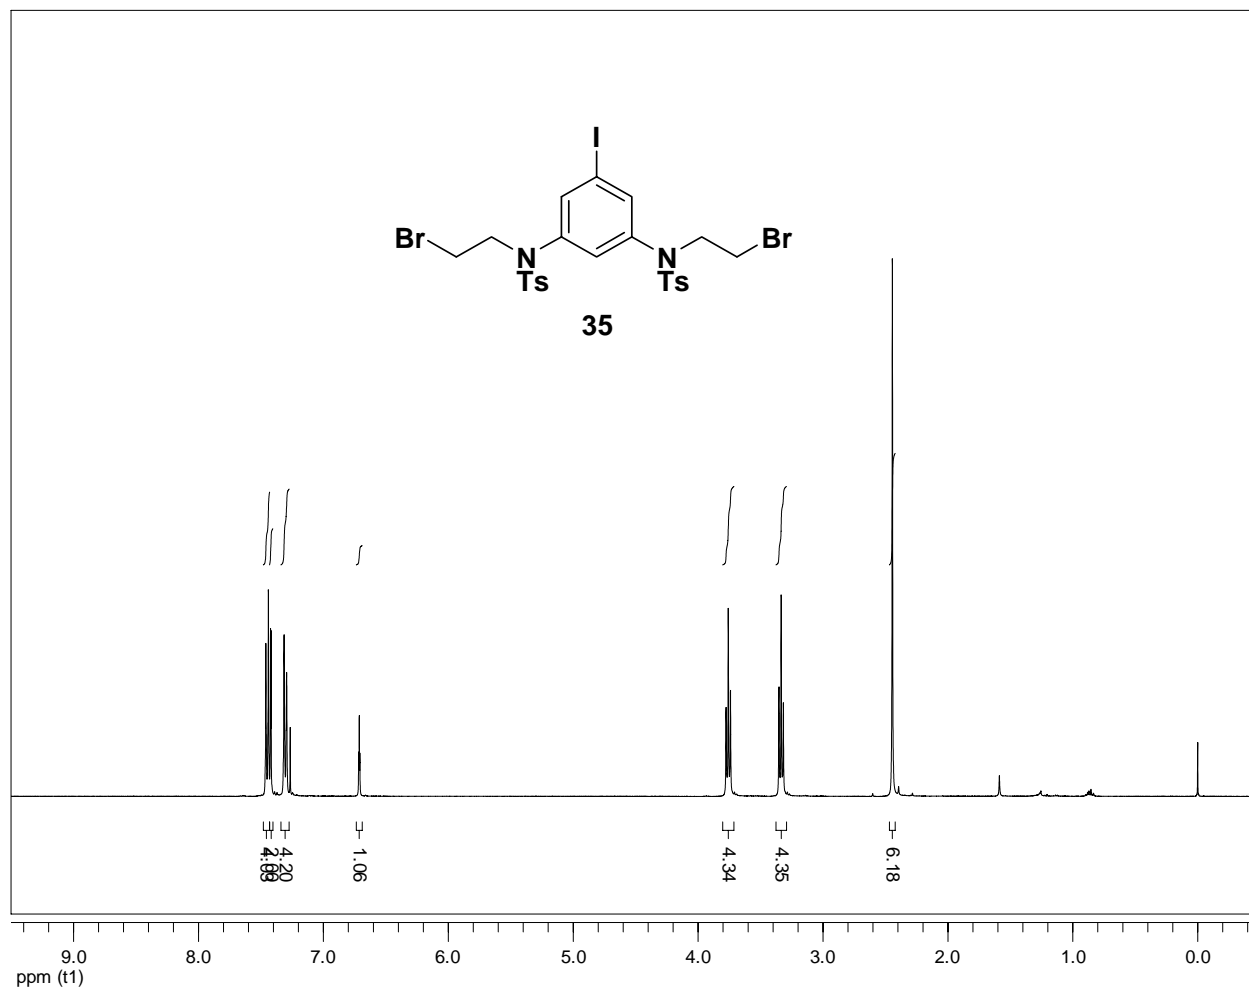

<sup>13</sup>C NMR (100 MHz, CDCl<sub>3</sub>)

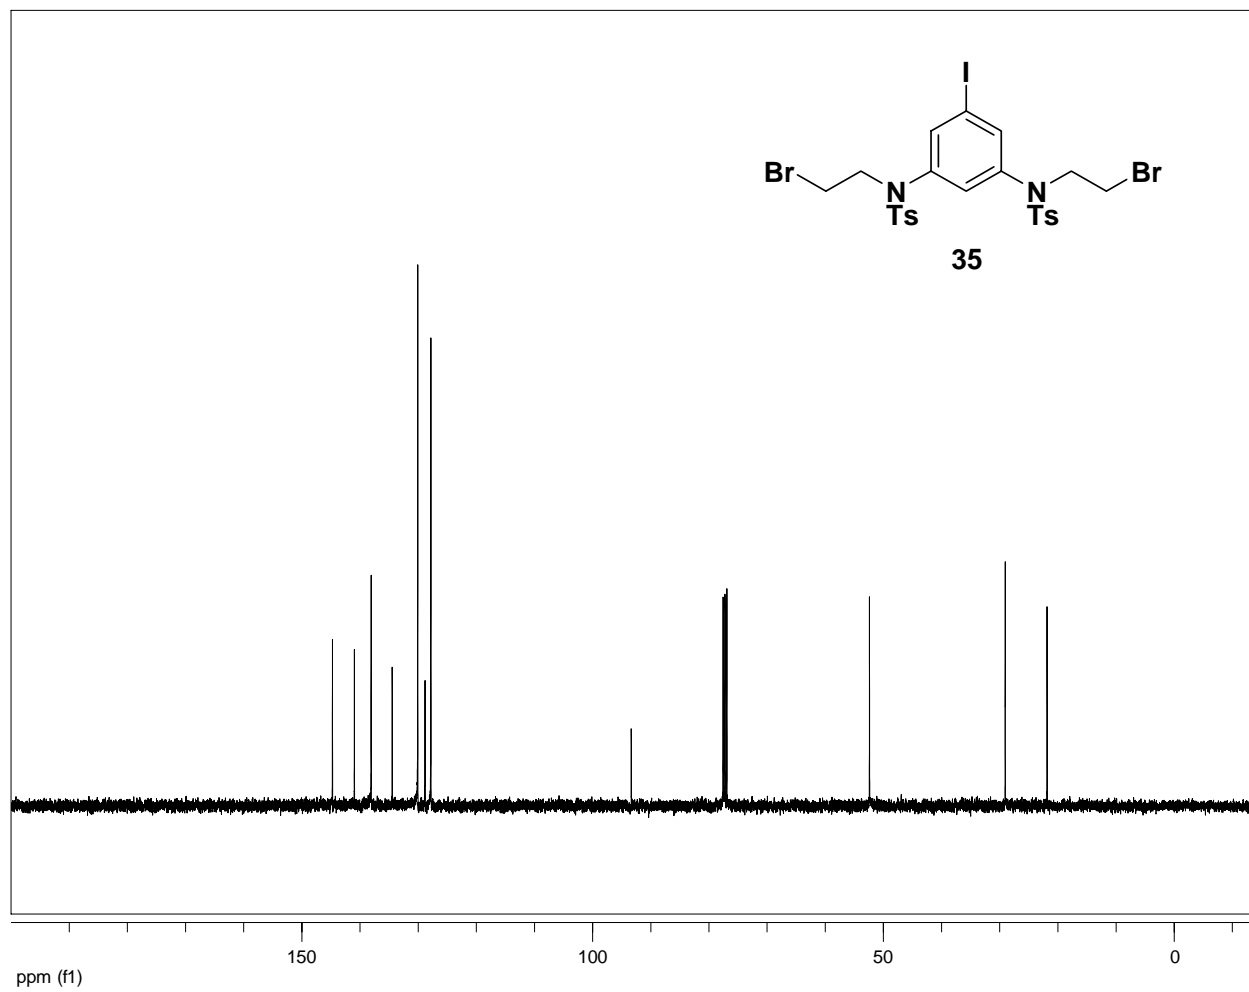

<sup>1</sup>H NMR (400 MHz, CDCl<sub>3</sub>)

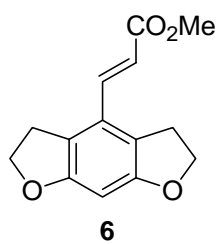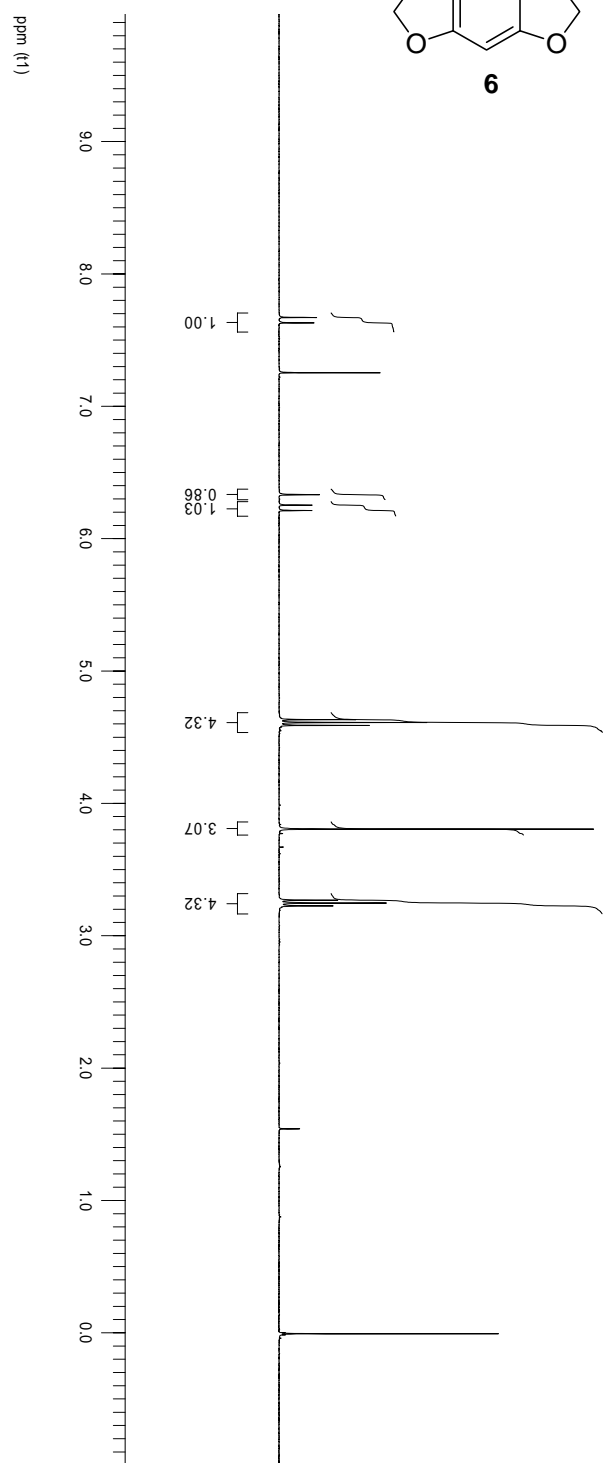

<sup>13</sup>C NMR (100 MHz, CDCl<sub>3</sub>)

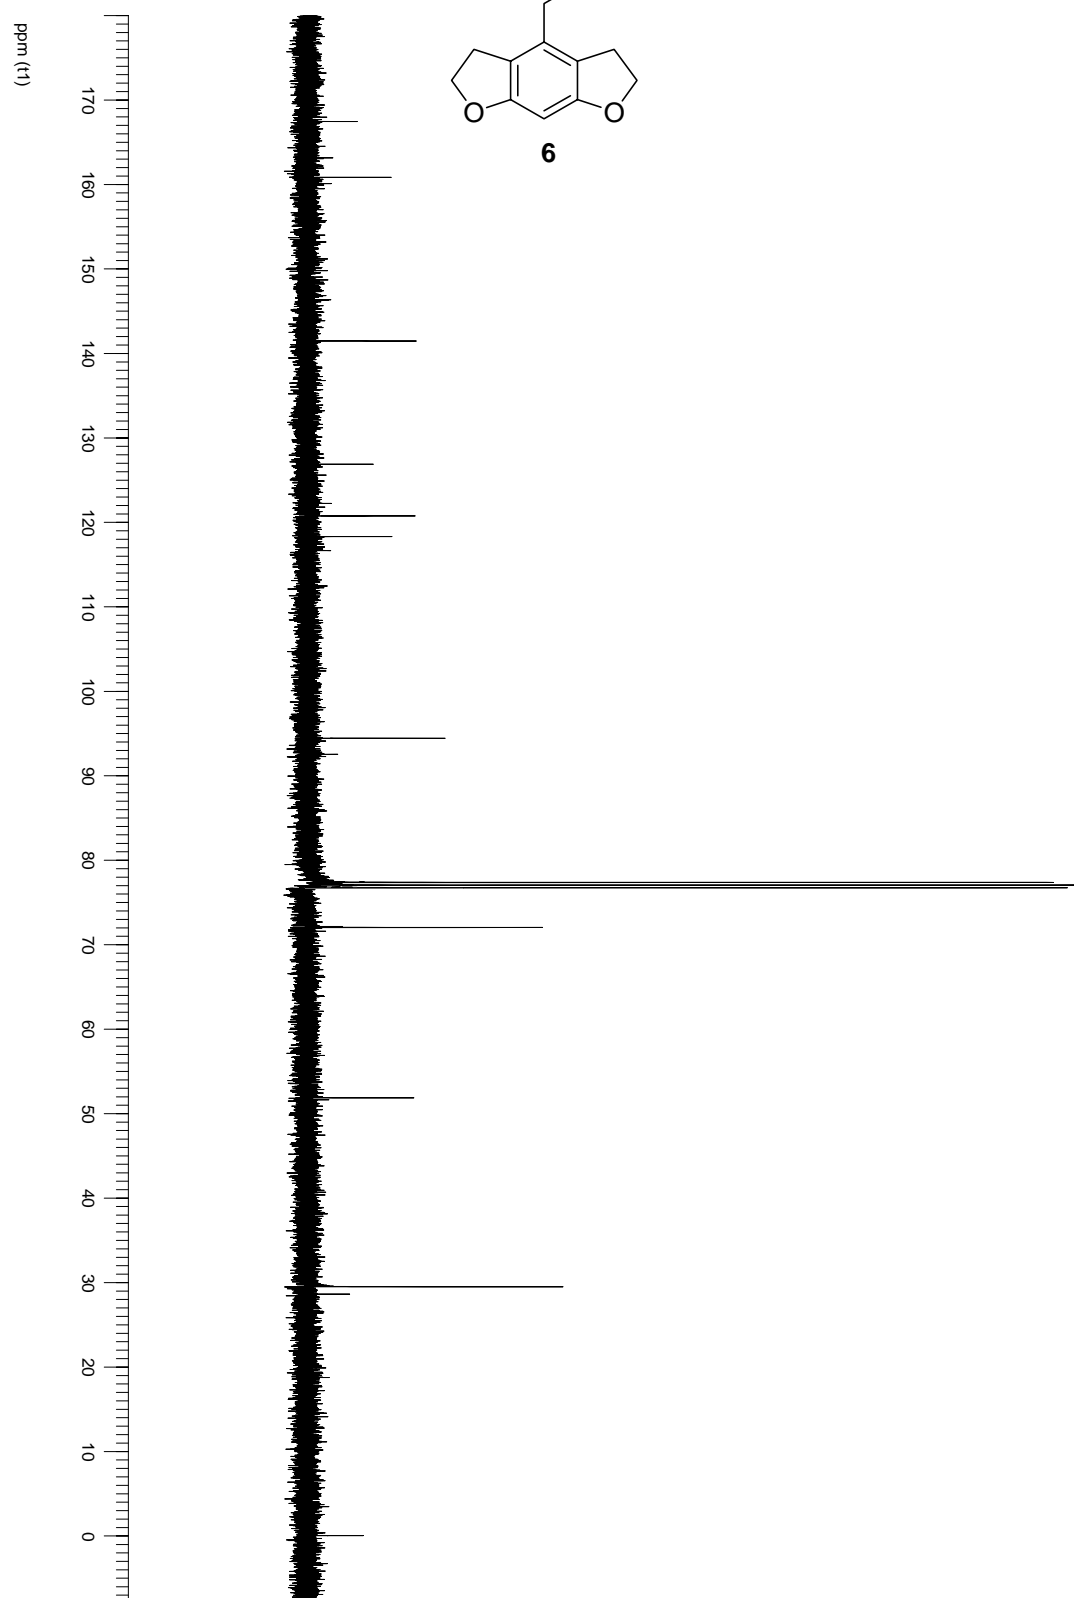

<sup>1</sup>H NMR (300 MHz, CDCl<sub>3</sub>)

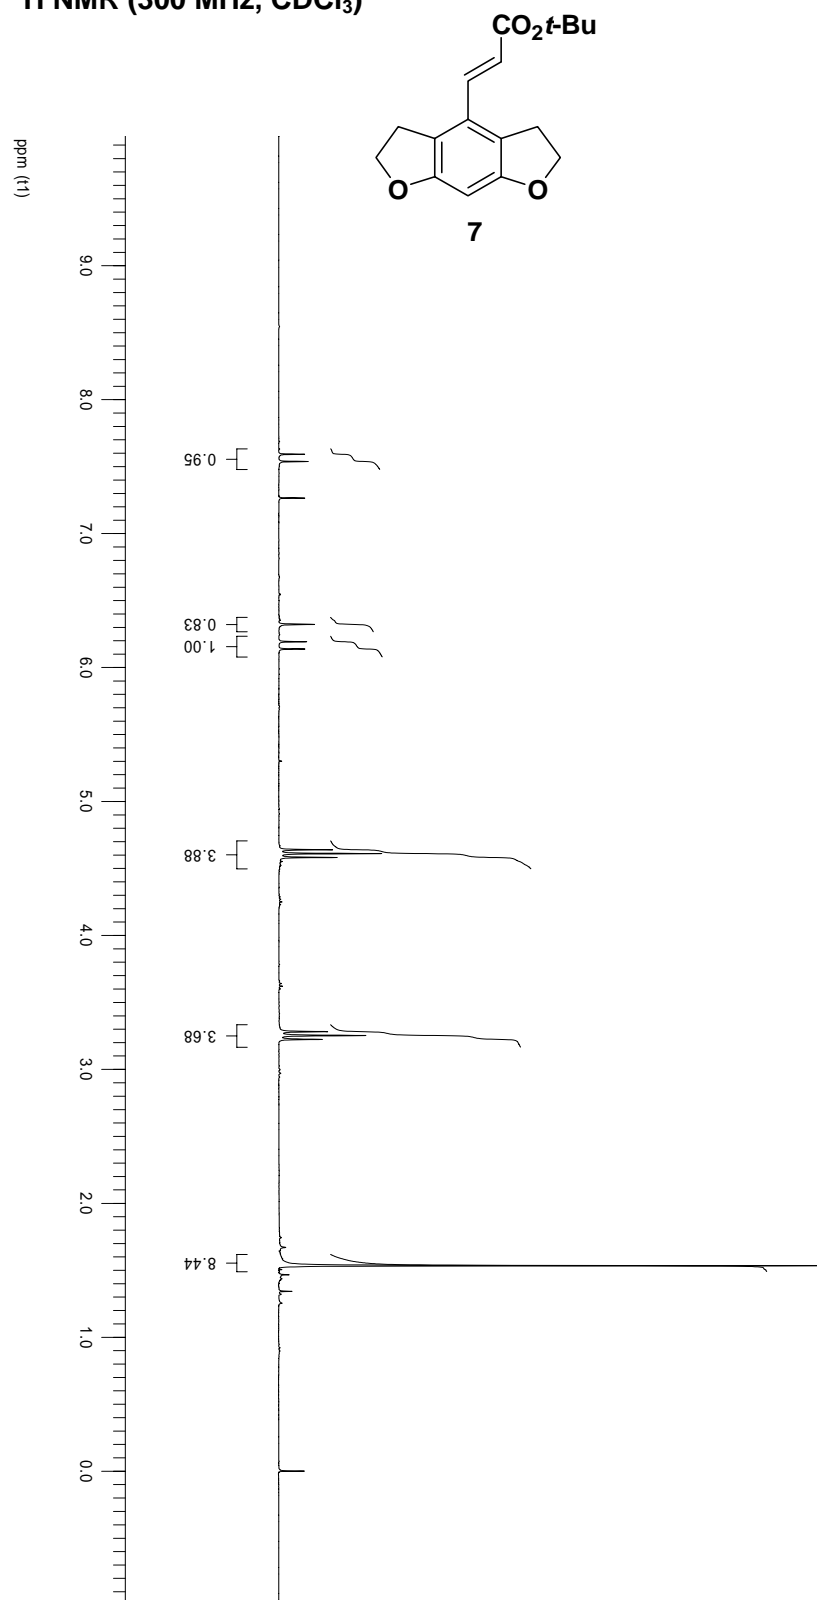

<sup>13</sup>C NMR (75 MHz, CDCl<sub>3</sub>)

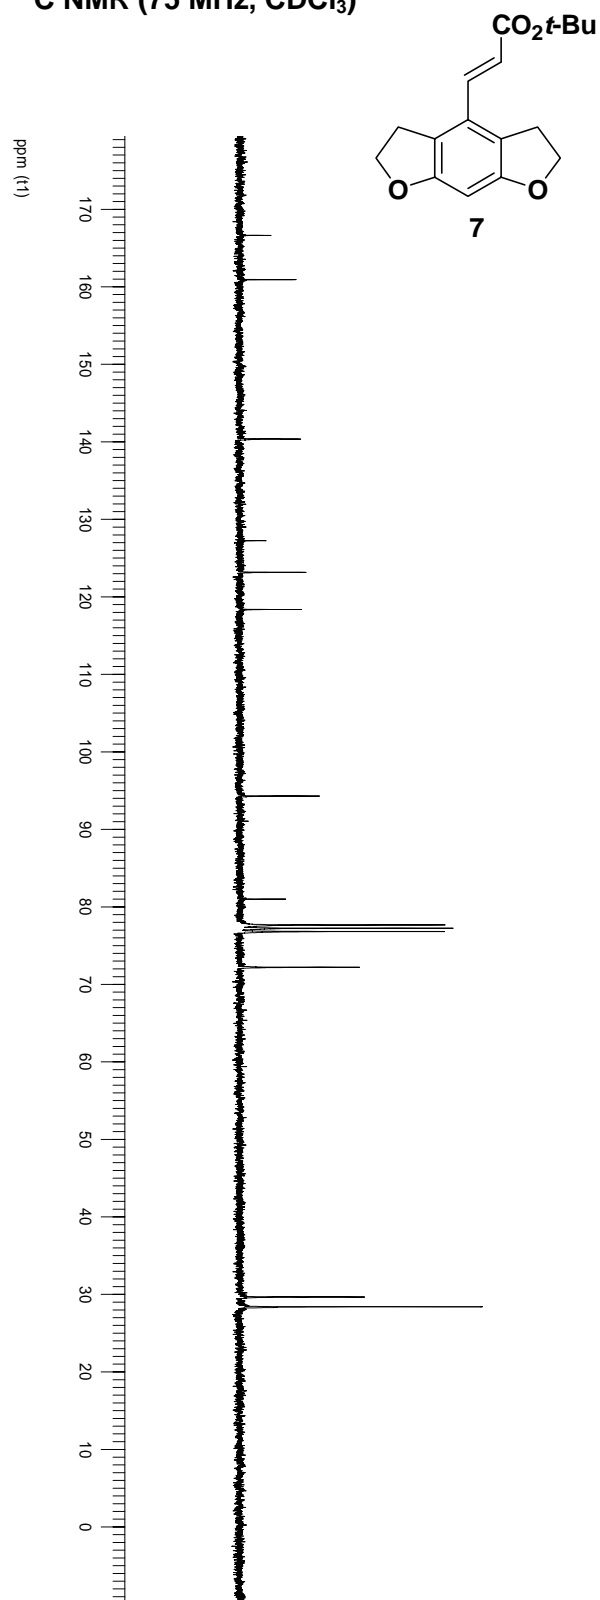

**<sup>1</sup>H NMR (300 MHz, CDCl<sub>3</sub>)**

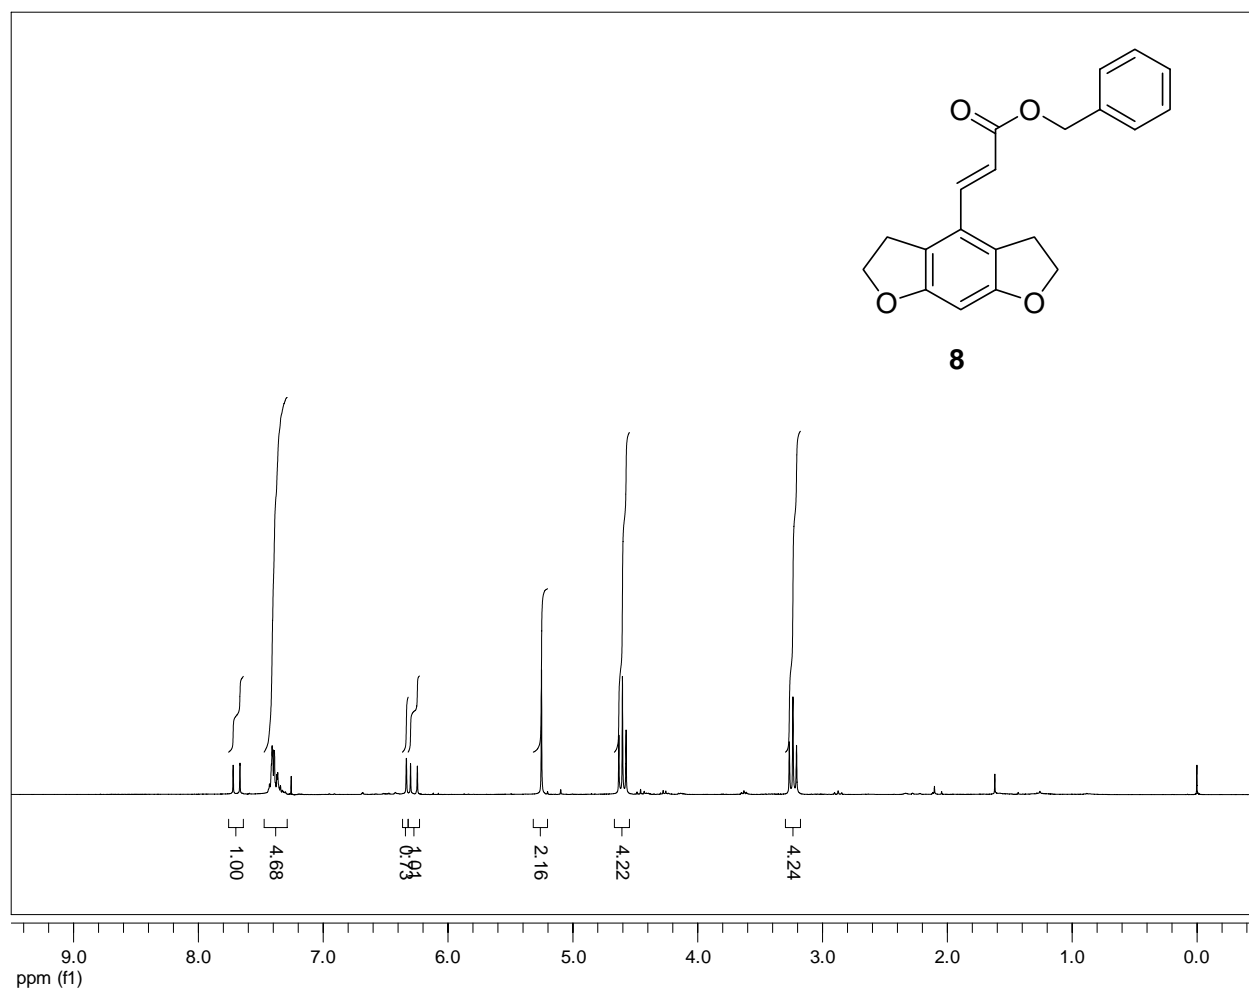

**$^{13}\text{C}$  NMR (75 MHz,  $\text{CDCl}_3$ )**

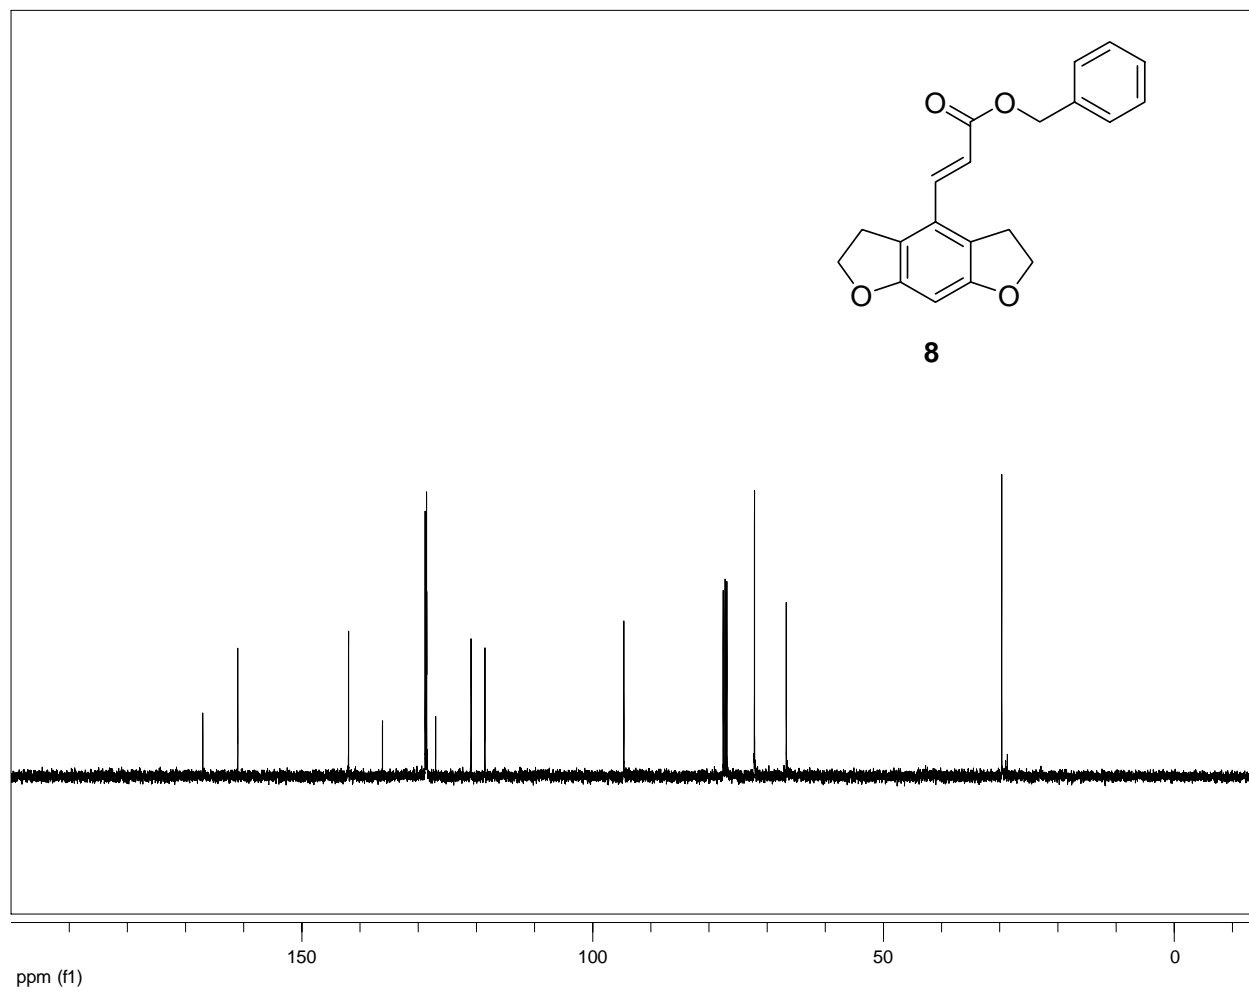



<sup>1</sup>H NMR (300 MHz, CDCl<sub>3</sub>)

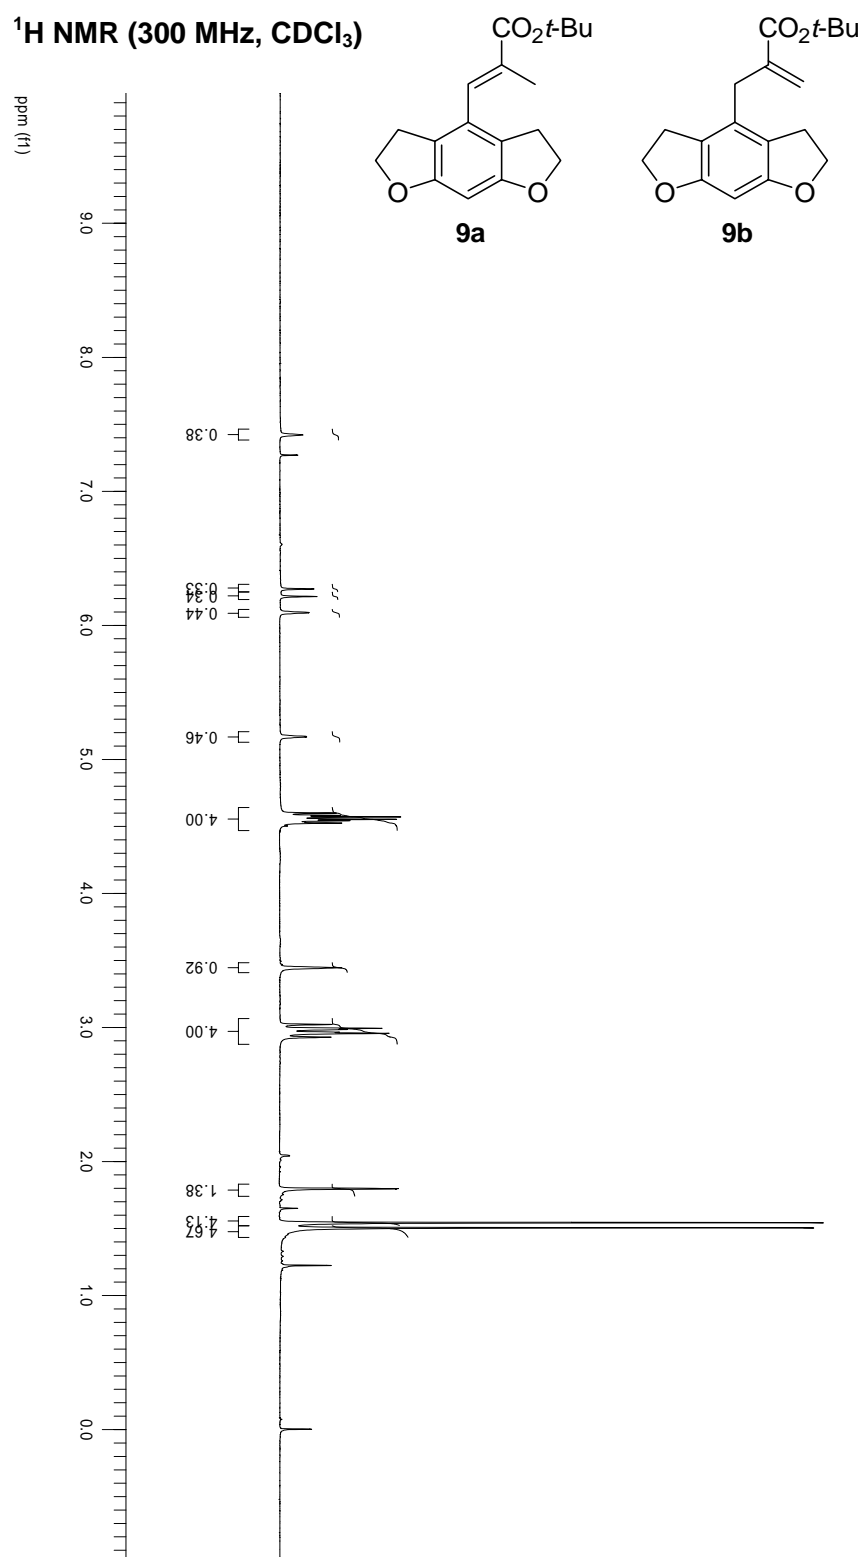

**$^{13}\text{C}$  NMR (75 MHz,  $\text{CDCl}_3$ )**

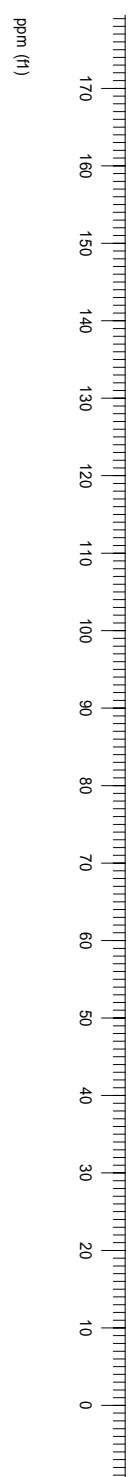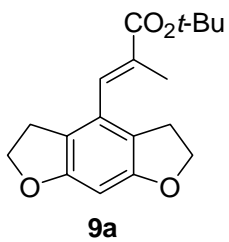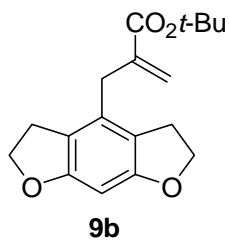

<sup>1</sup>H NMR (300 MHz, CDCl<sub>3</sub>)

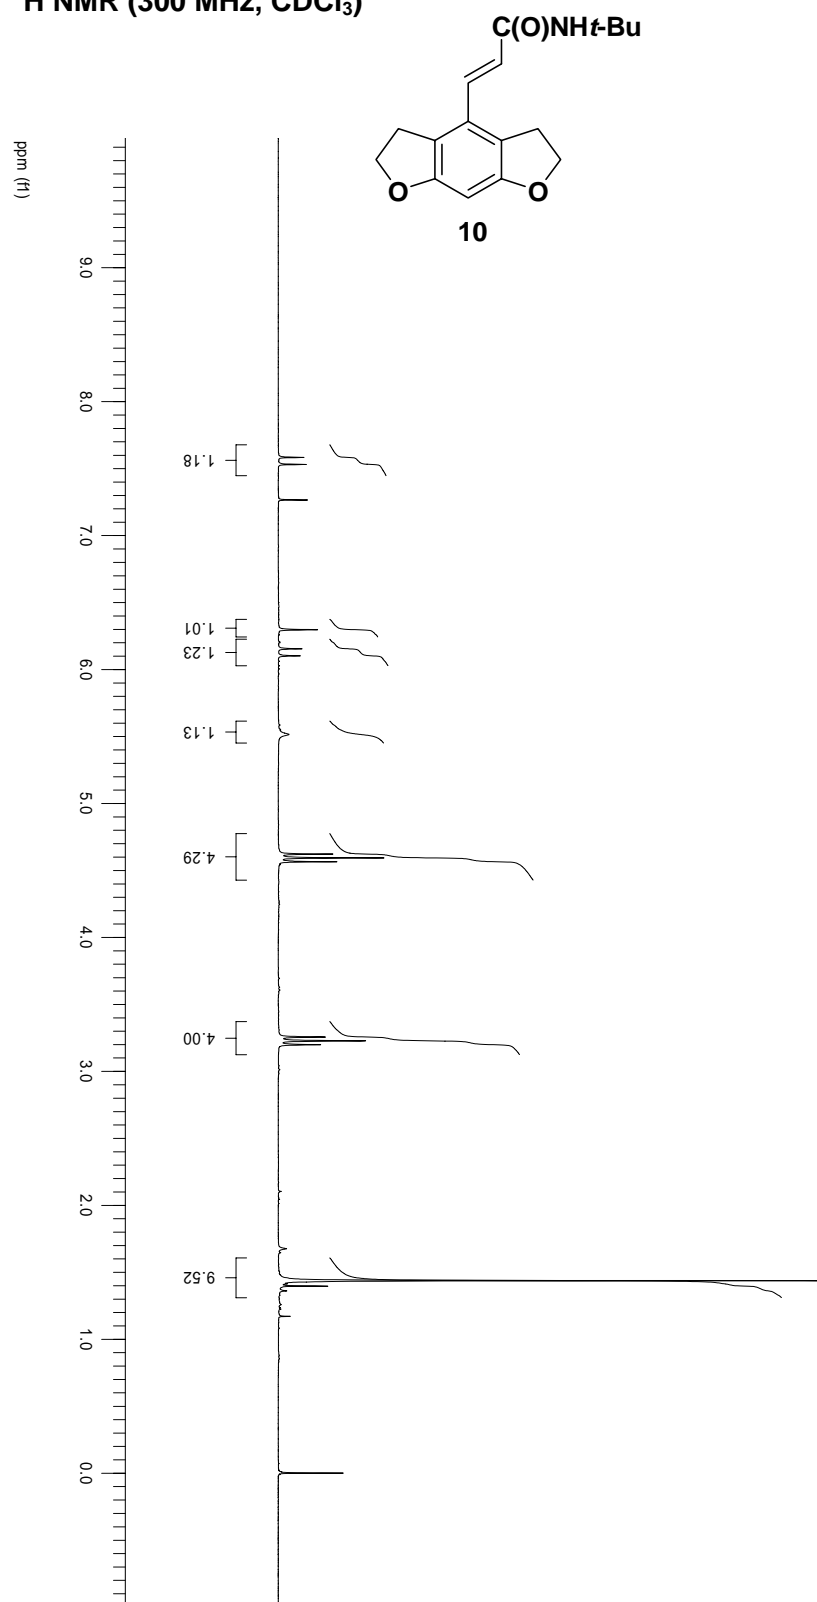

<sup>13</sup>C NMR (100 MHz, CDCl<sub>3</sub>)

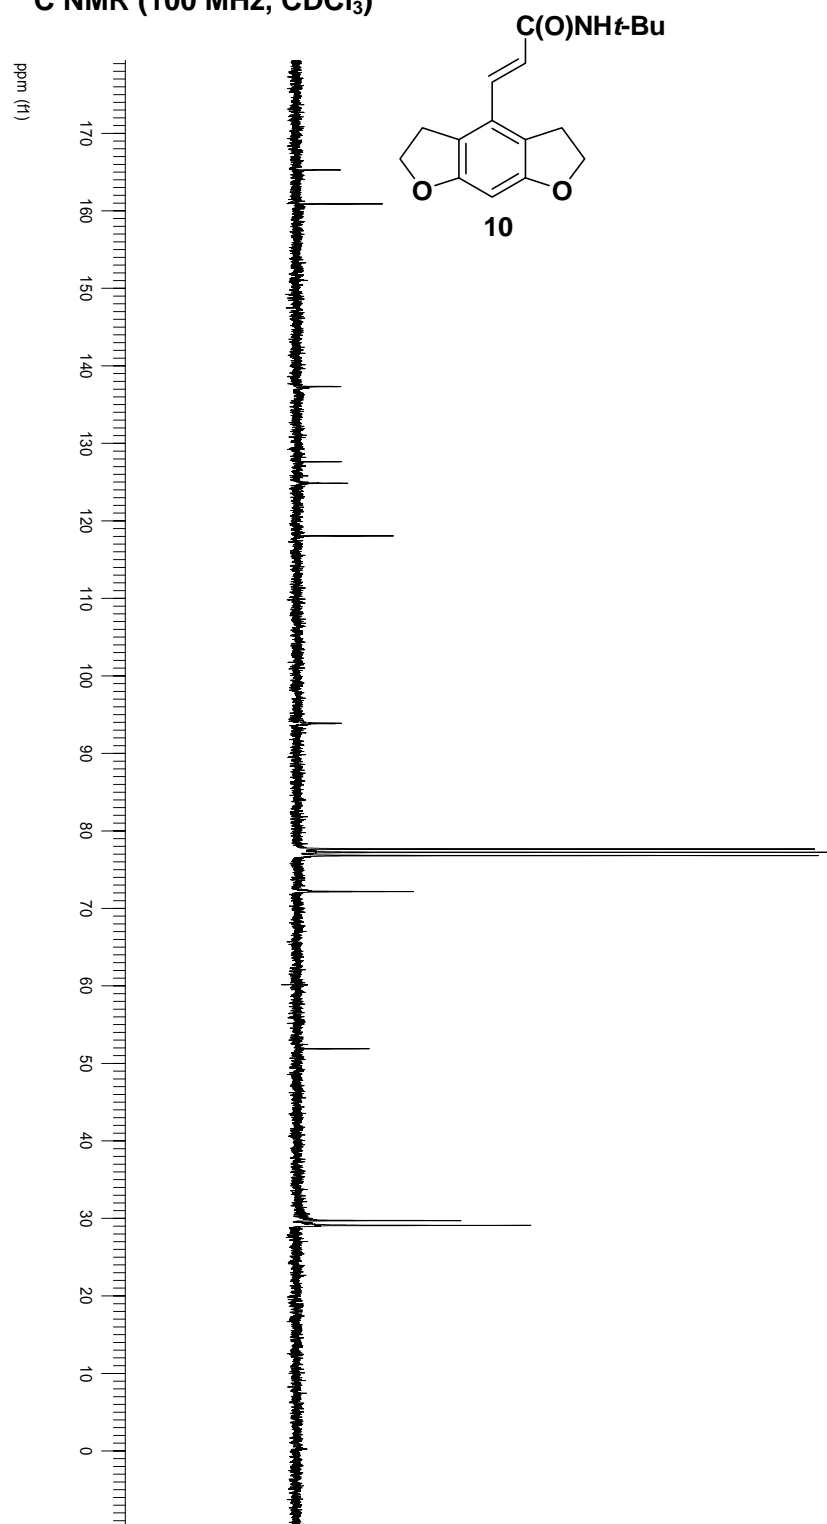

<sup>1</sup>H NMR (300 MHz, CDCl<sub>3</sub>)

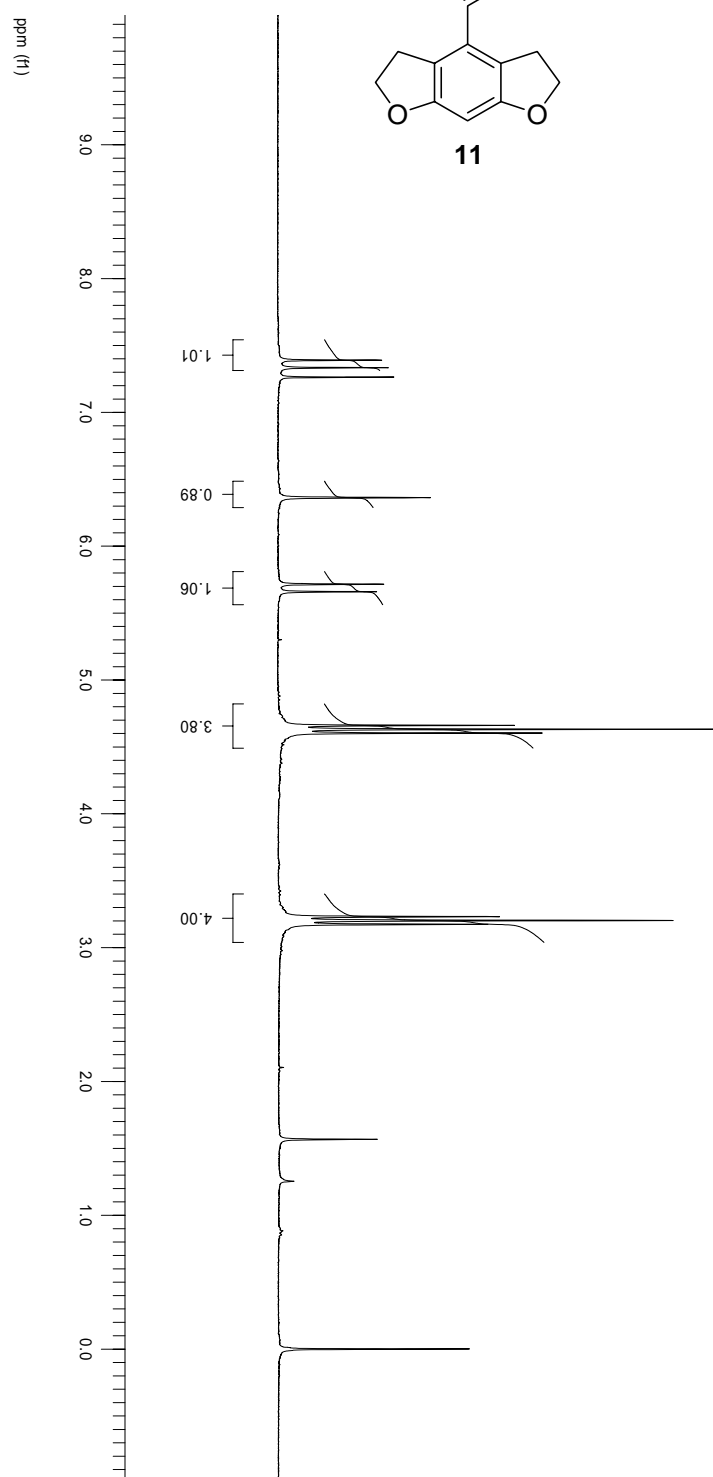

**$^{13}\text{C}$  NMR (100 MHz,  $\text{CDCl}_3$ )**

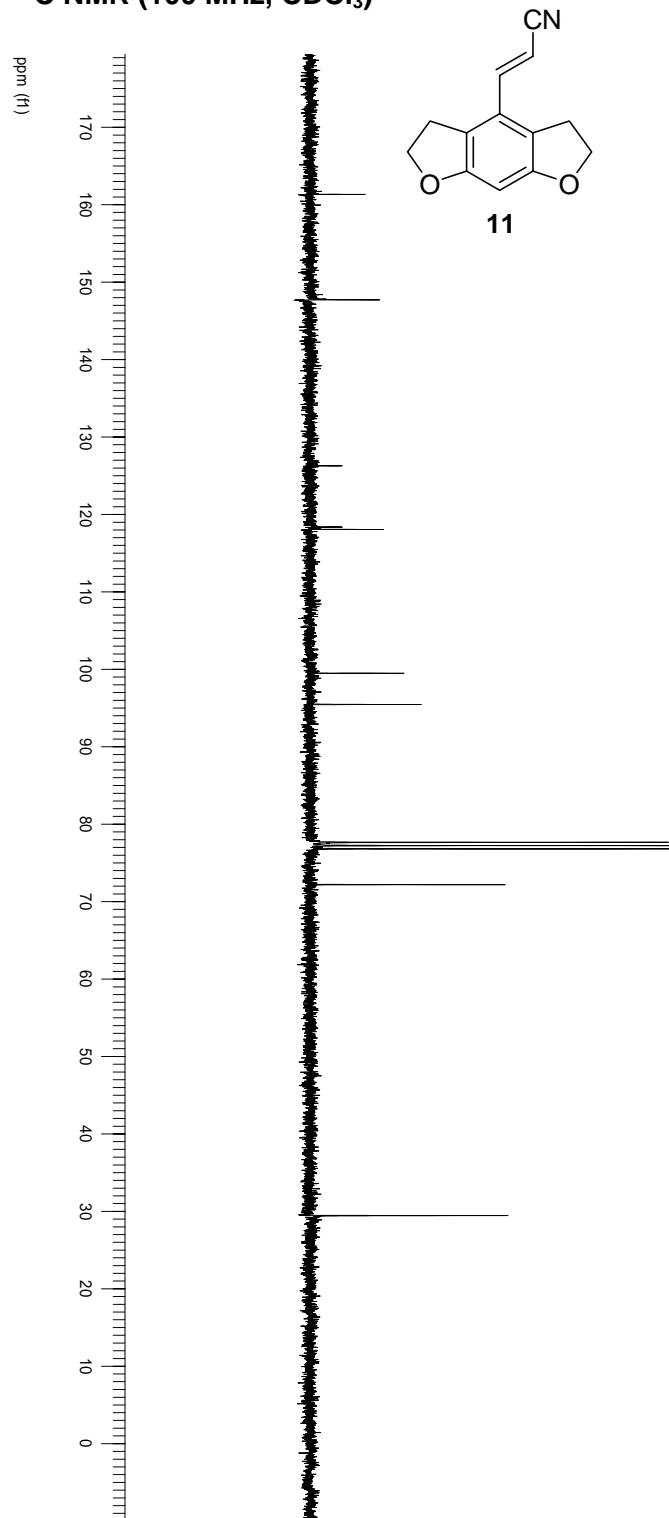

<sup>1</sup>H NMR (300 MHz, CDCl<sub>3</sub>)

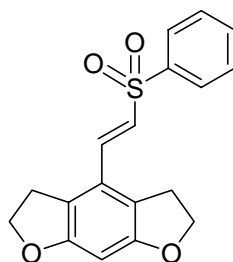

12

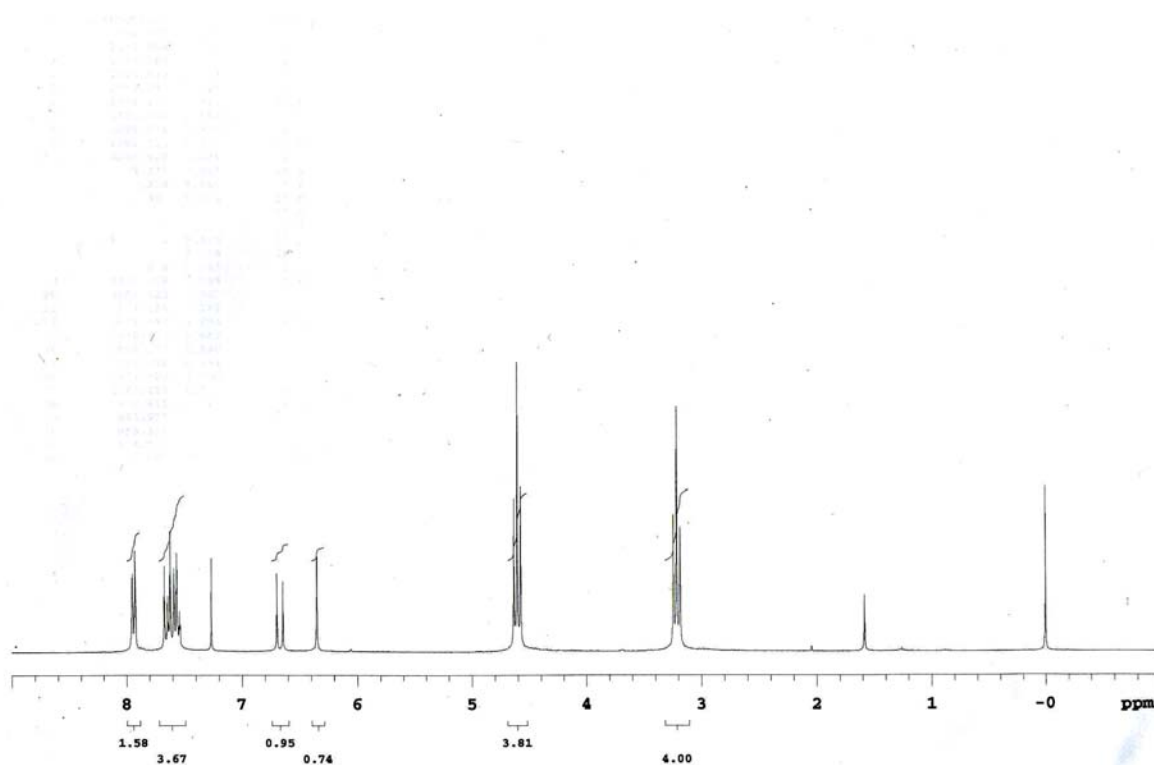

**$^{13}\text{C}$  NMR (100 MHz,  $\text{CDCl}_3$ )**

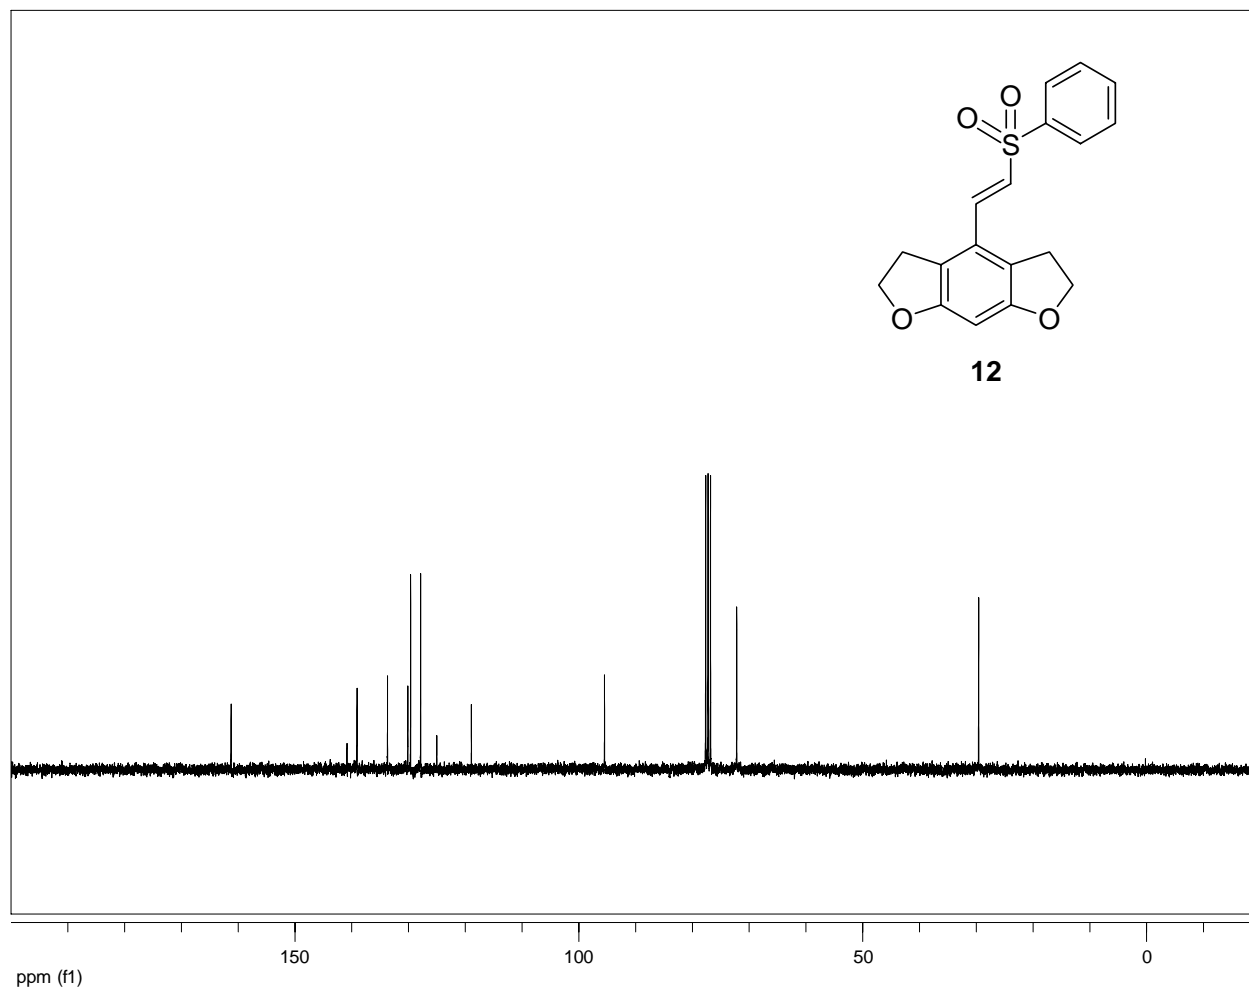



<sup>1</sup>H NMR (300 MHz, CDCl<sub>3</sub>)

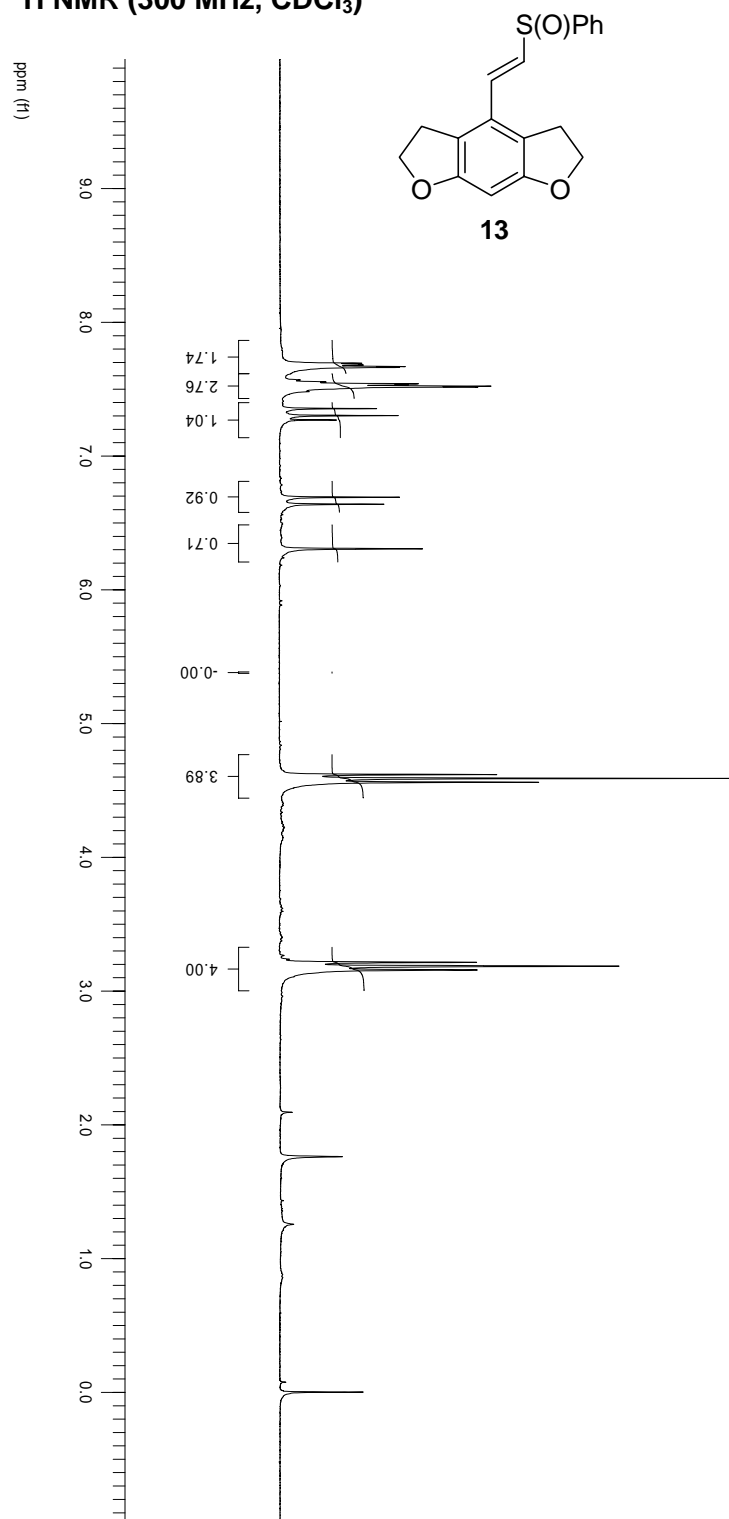

<sup>13</sup>C NMR (75 MHz, CDCl<sub>3</sub>)

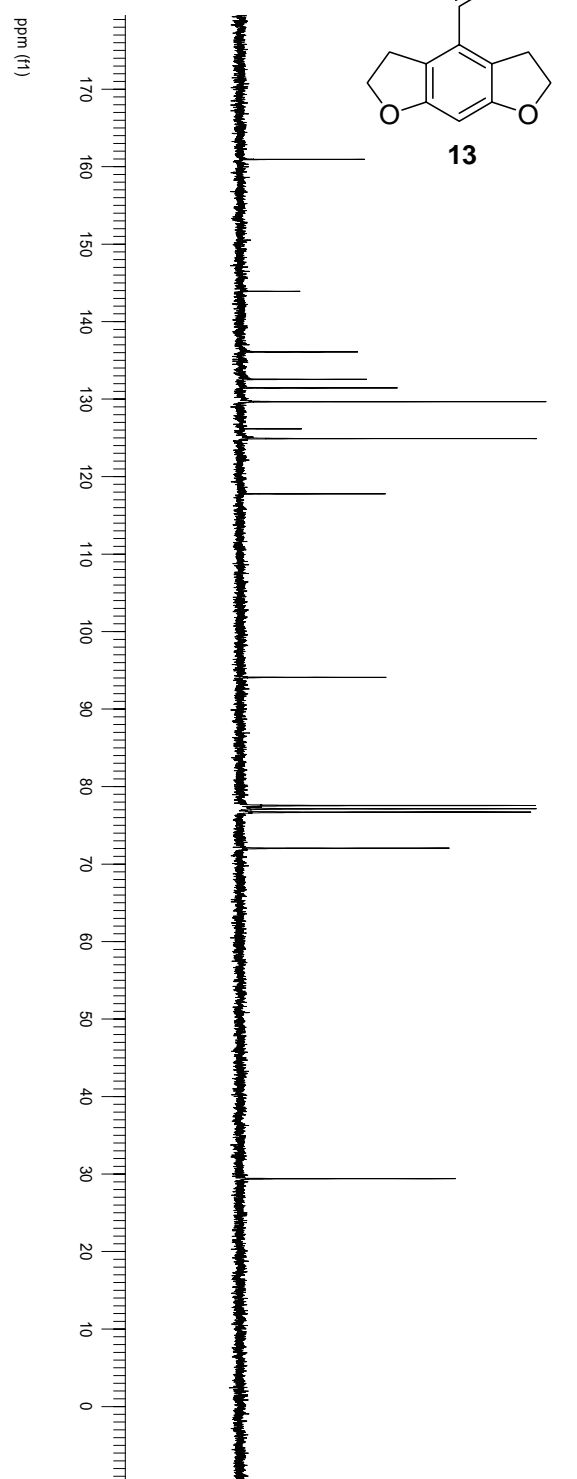

$^1\text{H}$  NMR (400 MHz,  $\text{CDCl}_3$ )

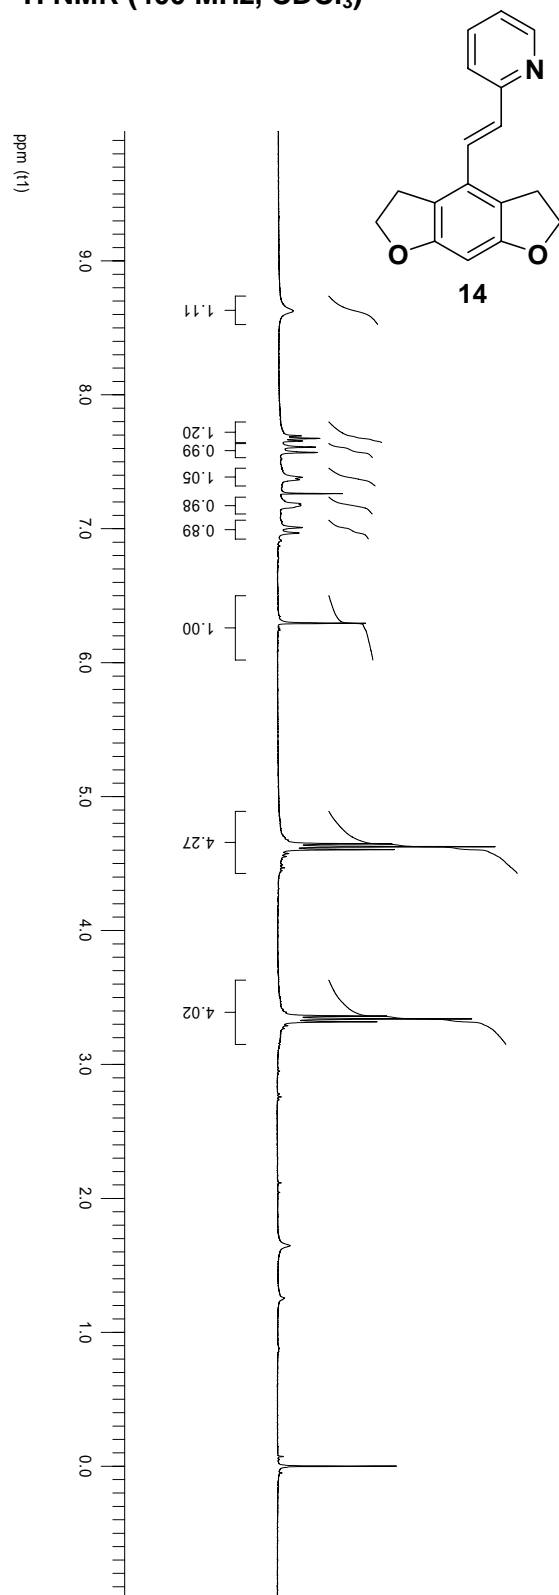

**$^{13}\text{C}$  NMR (100 MHz,  $\text{CDCl}_3$ )**

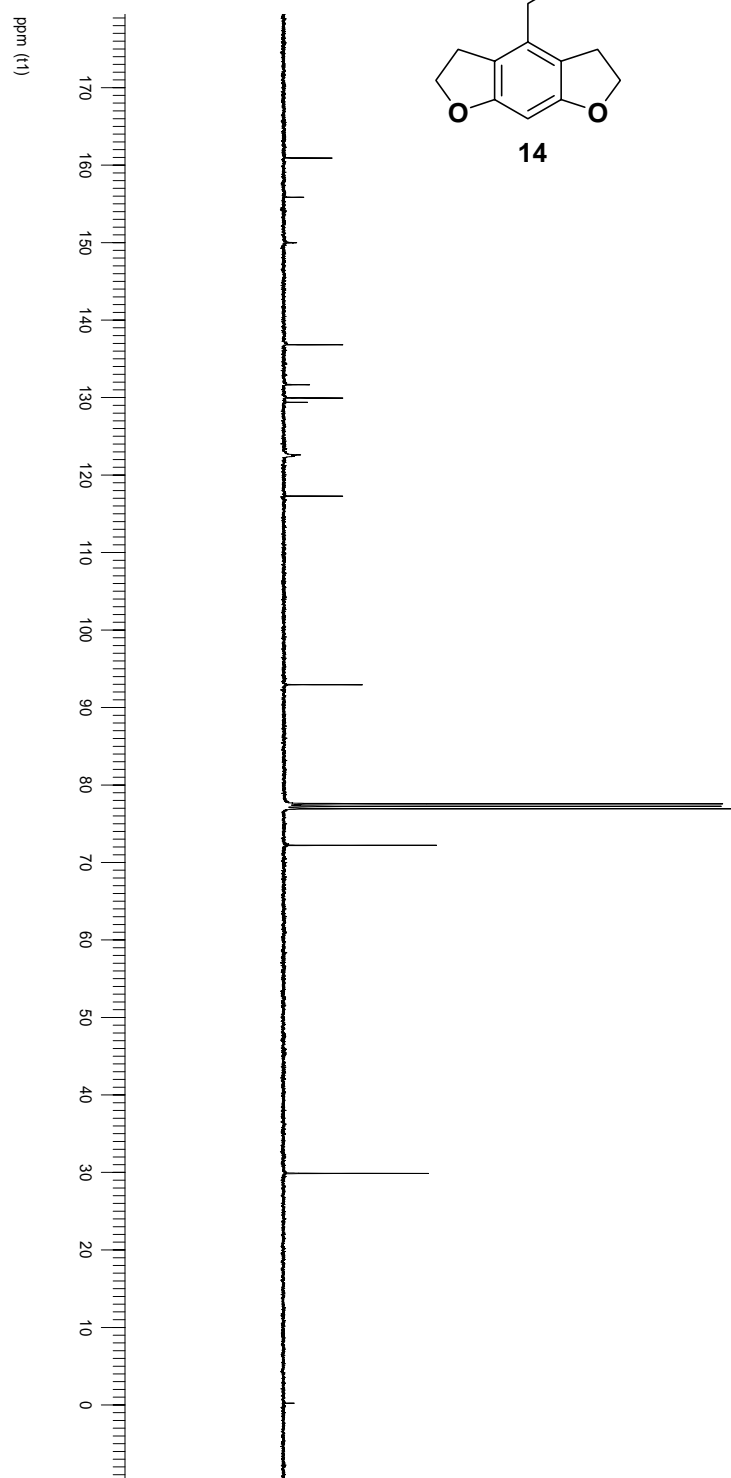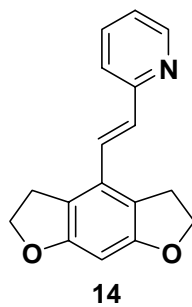

<sup>1</sup>H NMR (300 MHz, CDCl<sub>3</sub>)

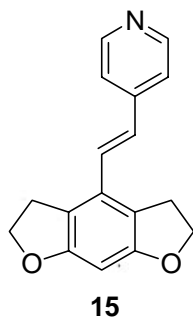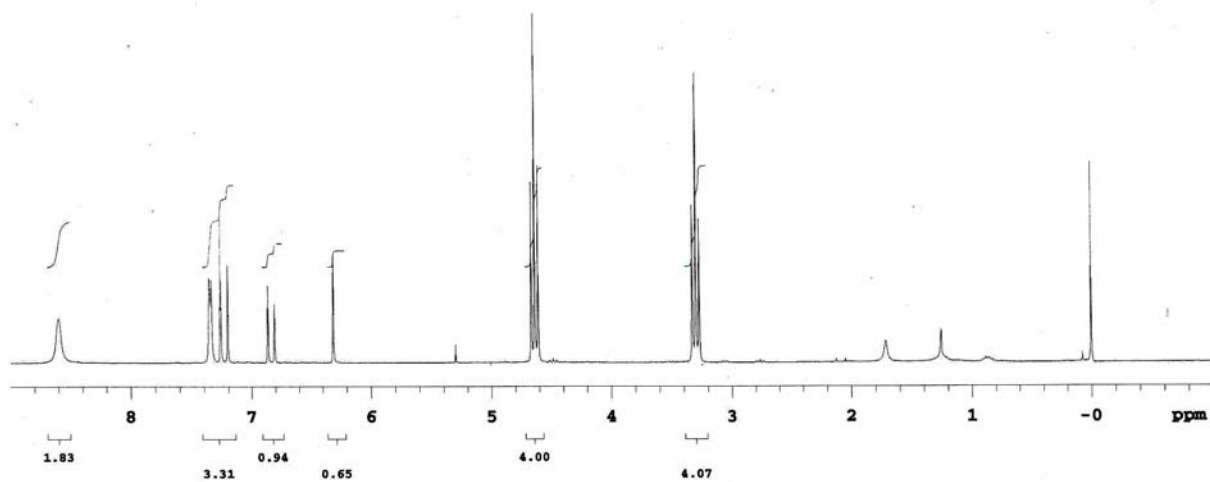

$^{13}\text{C}$  NMR (75 MHz,  $\text{CDCl}_3$ )

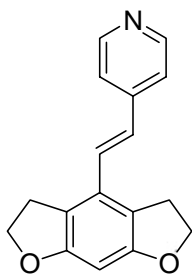

15

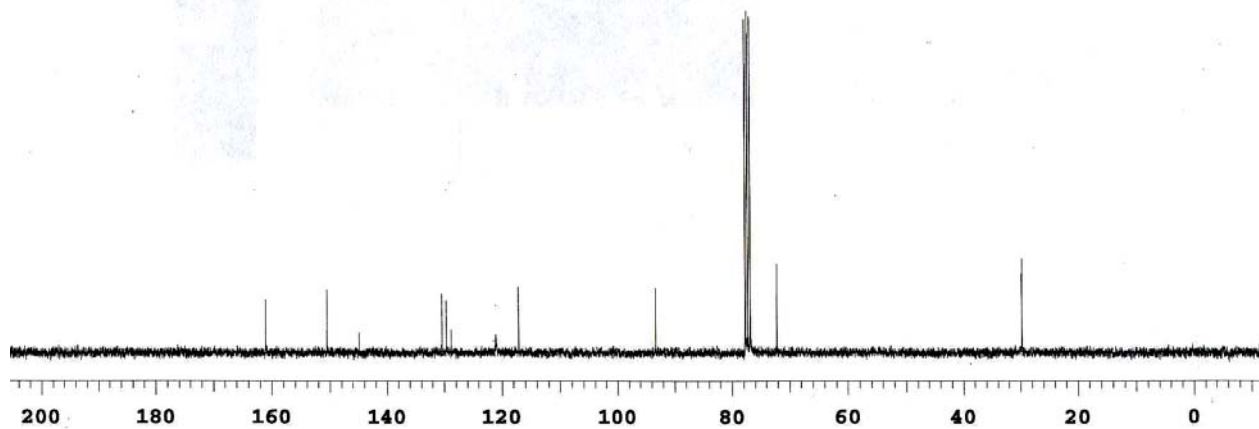

<sup>1</sup>H NMR (400 MHz, CDCl<sub>3</sub>)

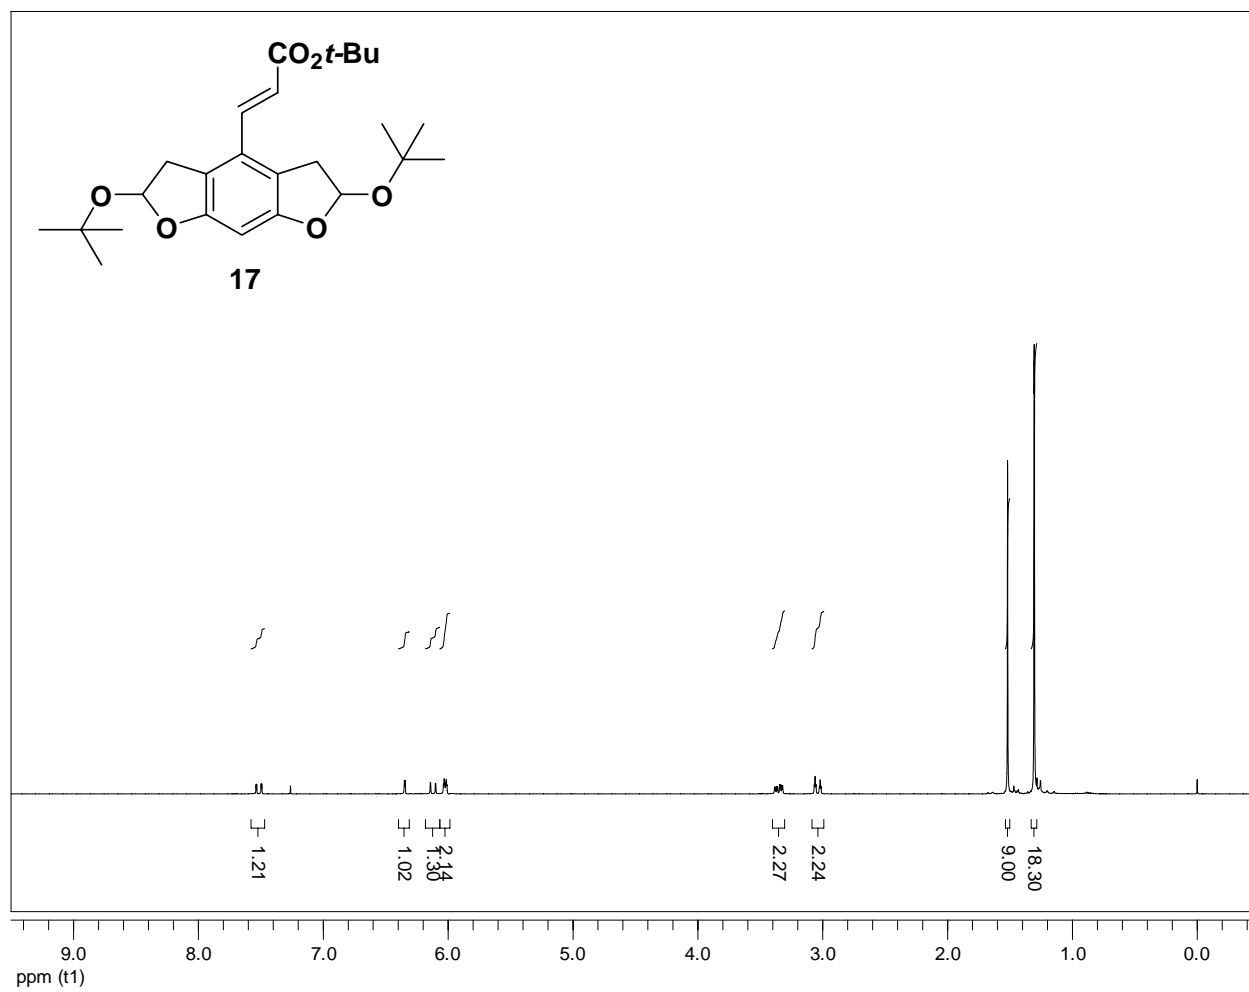

**$^{13}\text{C}$  NMR (100 MHz,  $\text{CDCl}_3$ )**

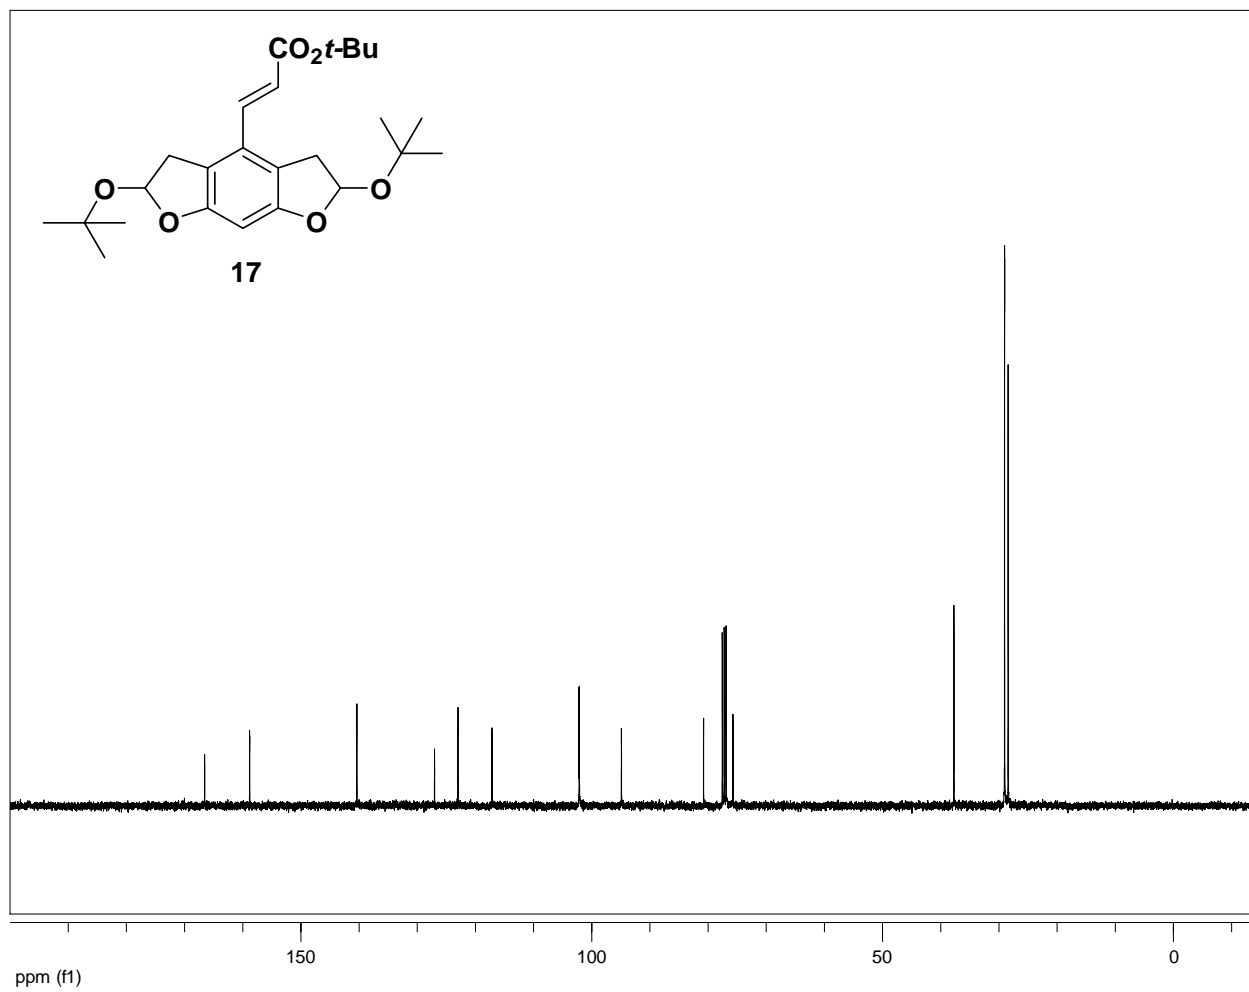



<sup>1</sup>H NMR (300 MHz, CDCl<sub>3</sub>)

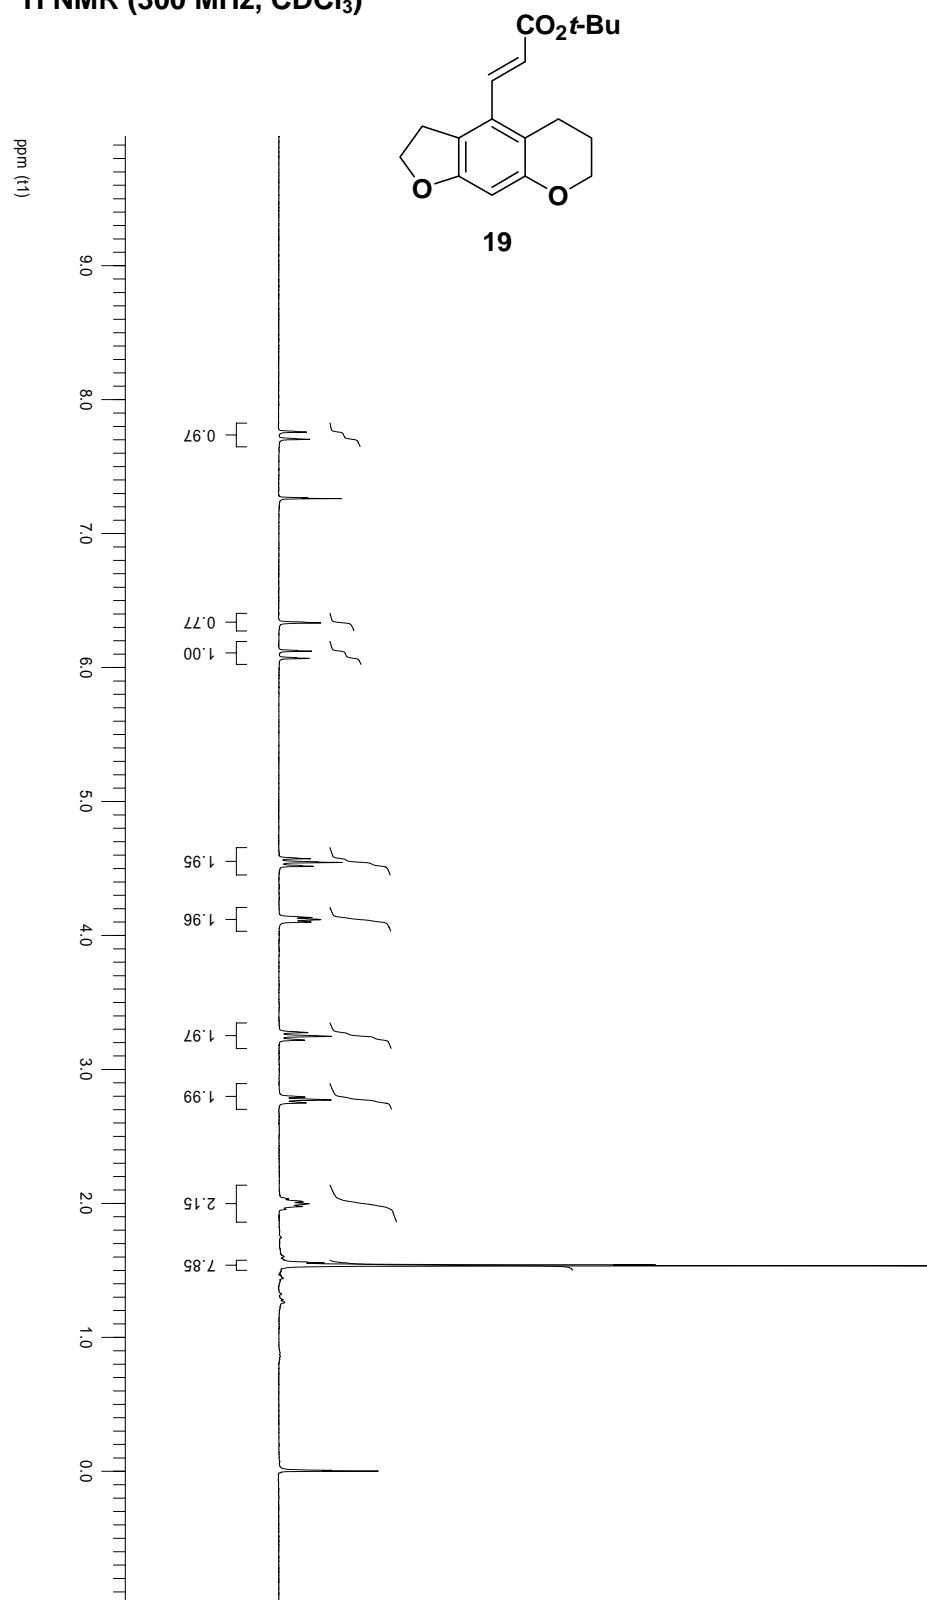

**$^{13}\text{C}$  NMR (75 MHz,  $\text{CDCl}_3$ )**

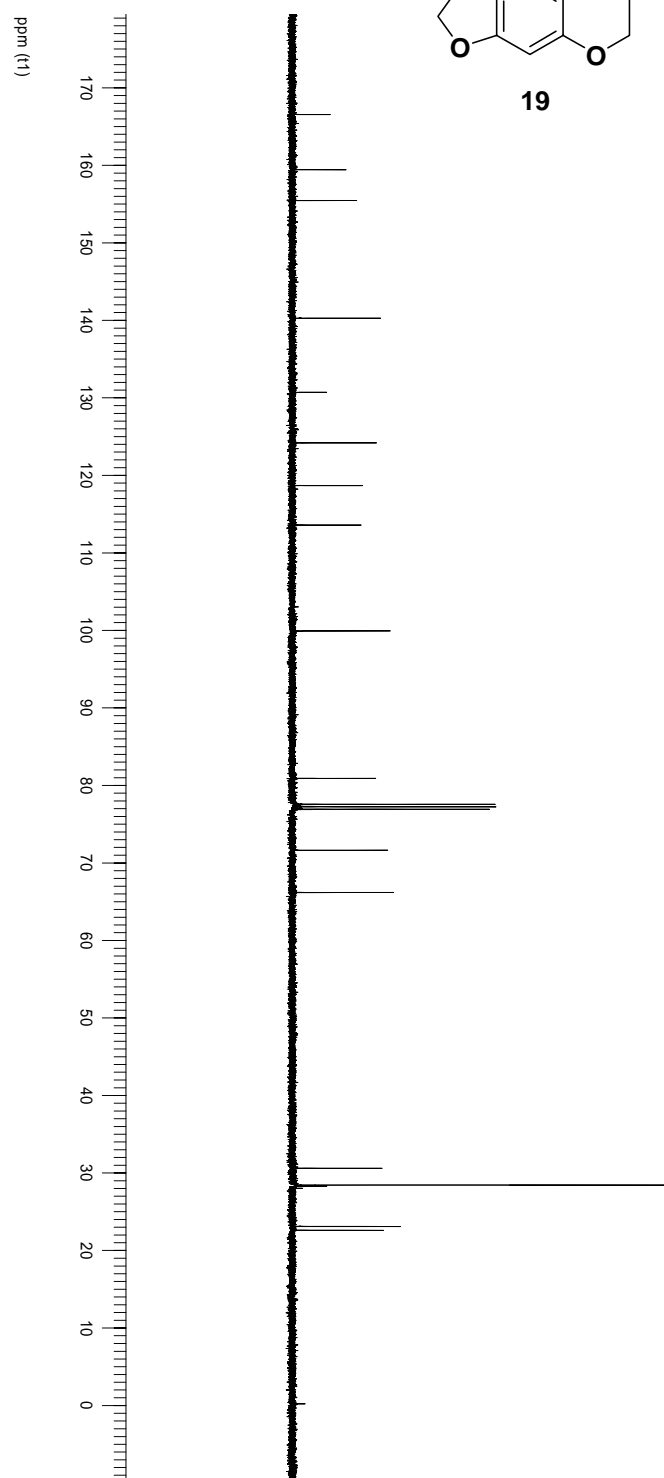

<sup>1</sup>H NMR (400 MHz, CDCl<sub>3</sub>)

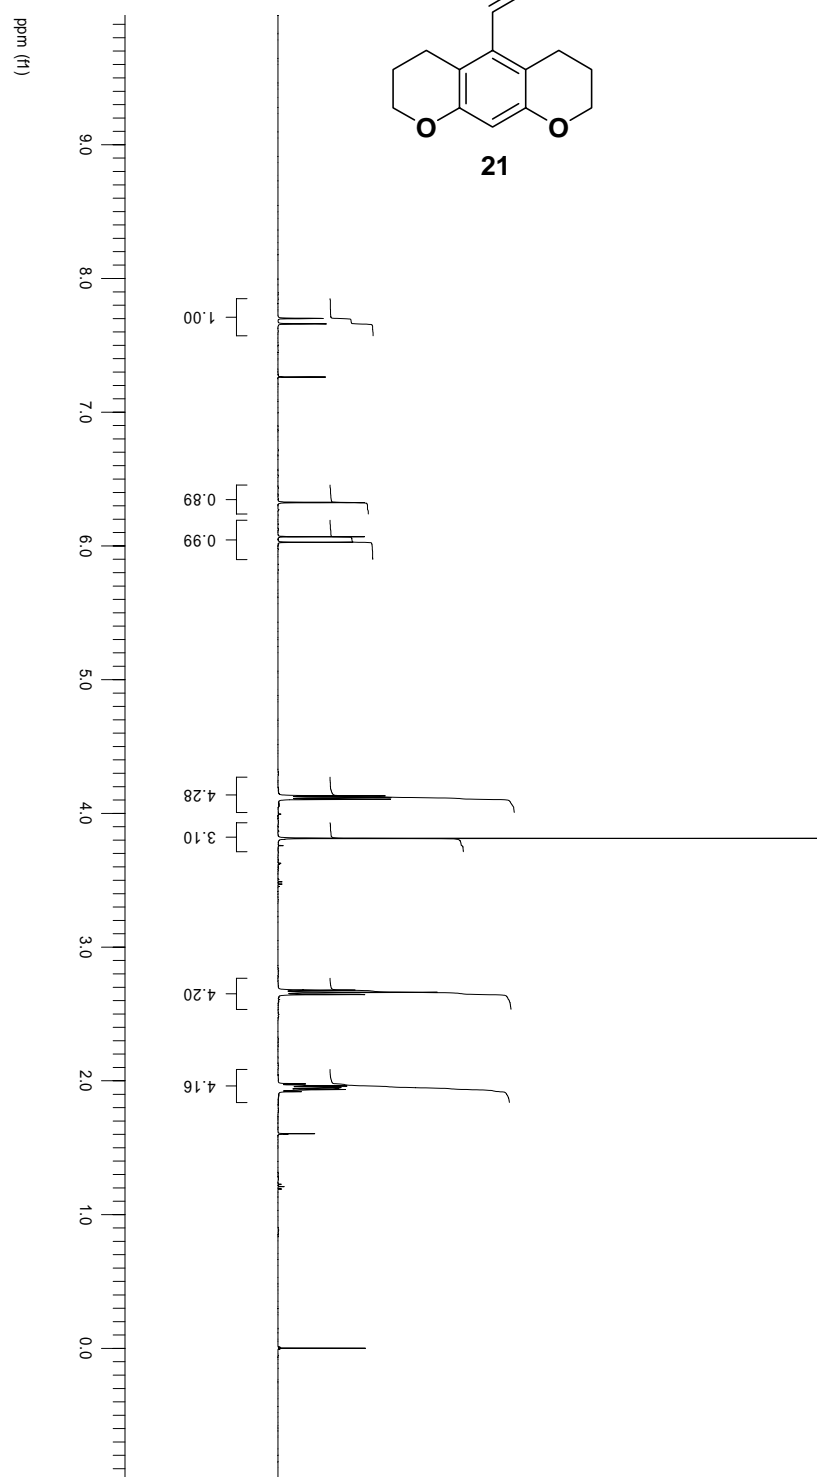

<sup>13</sup>C NMR (100 MHz, CDCl<sub>3</sub>)

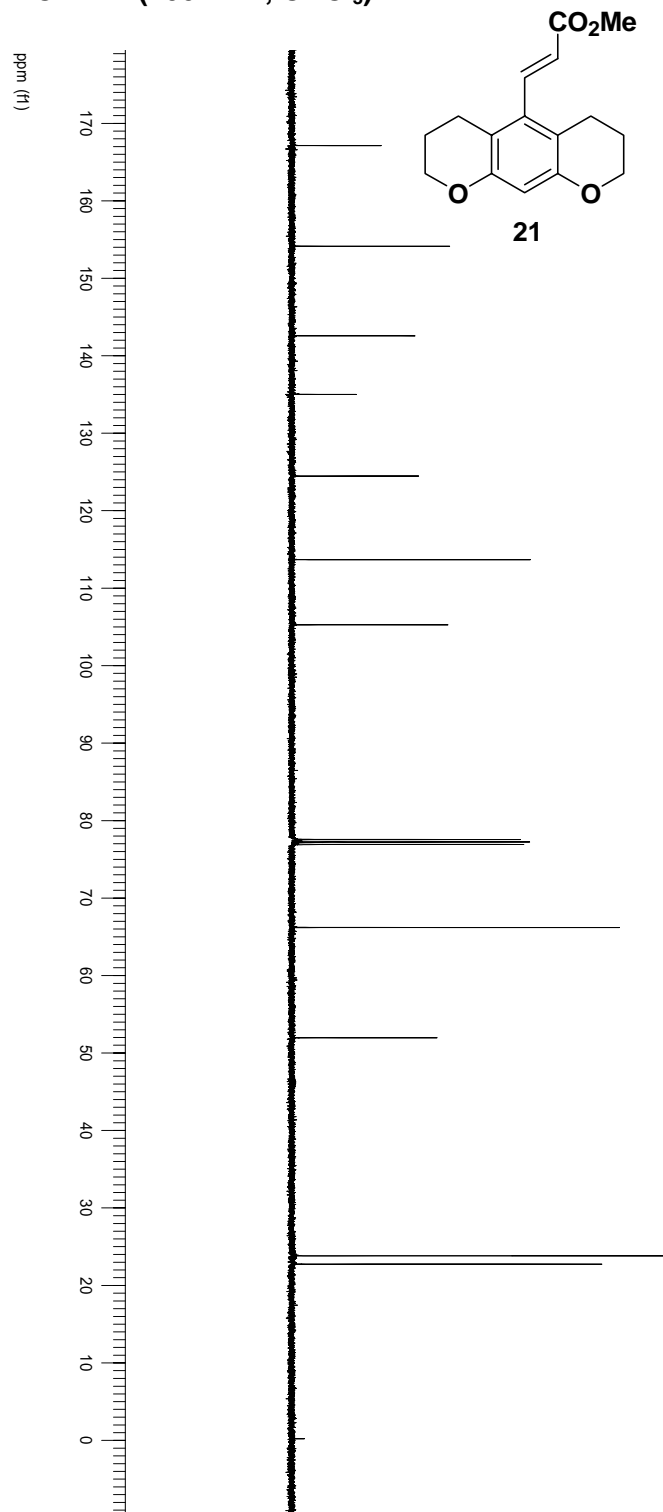

$^1\text{H}$  NMR (400 MHz,  $\text{CDCl}_3$ )

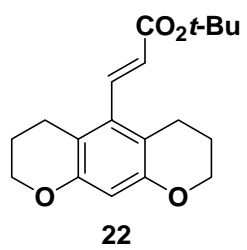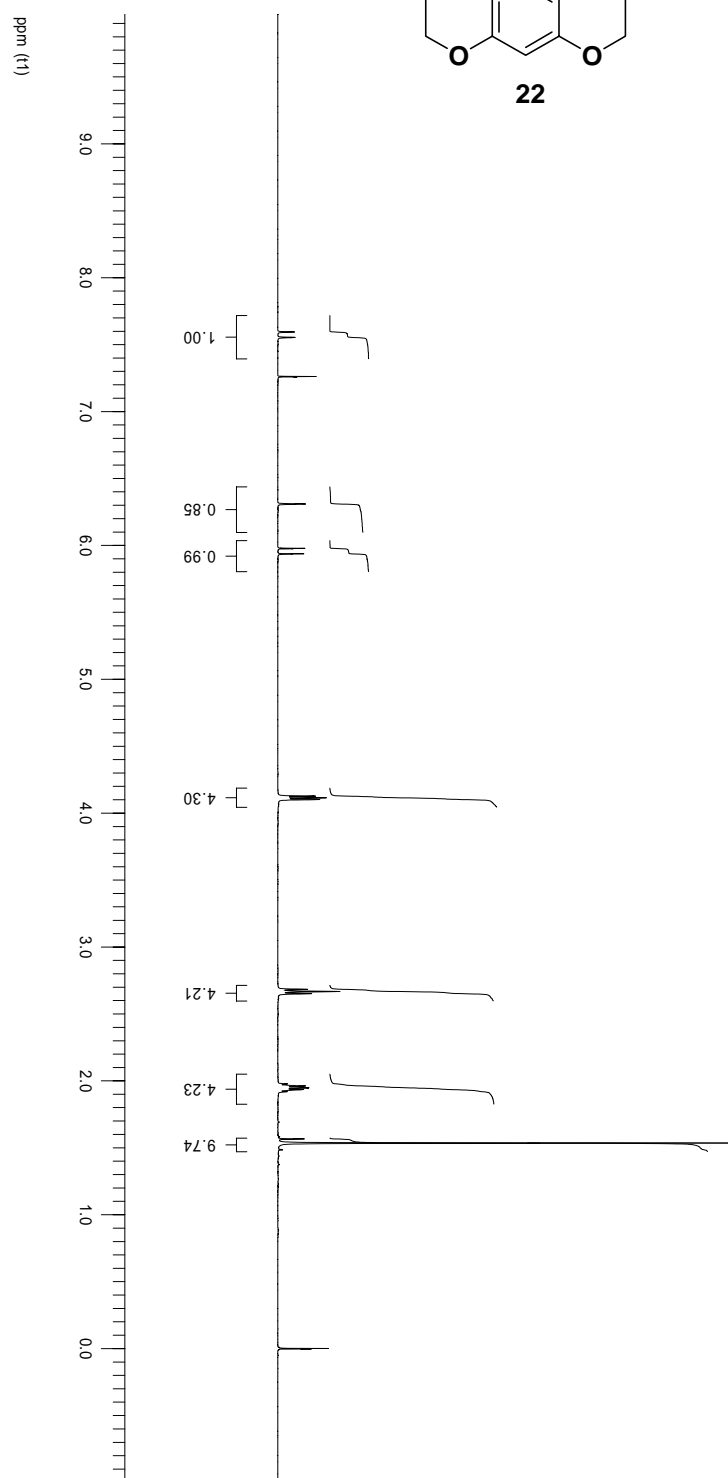

**$^{13}\text{C}$  NMR (100 MHz,  $\text{CDCl}_3$ )**

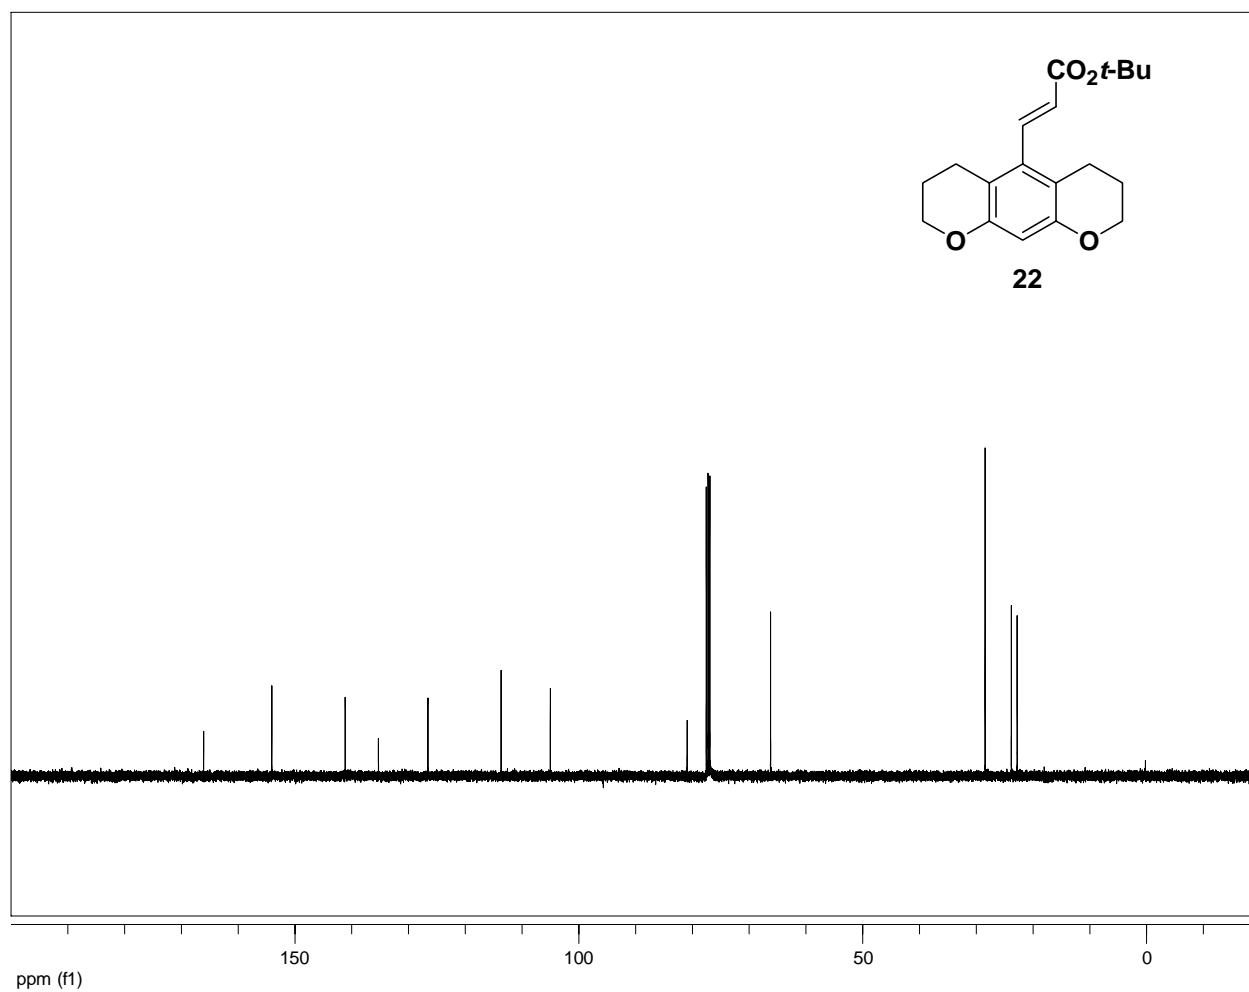

<sup>1</sup>H NMR (300 MHz, CDCl<sub>3</sub>)

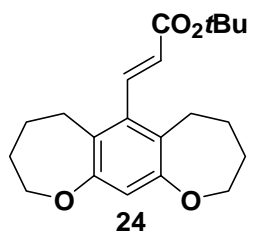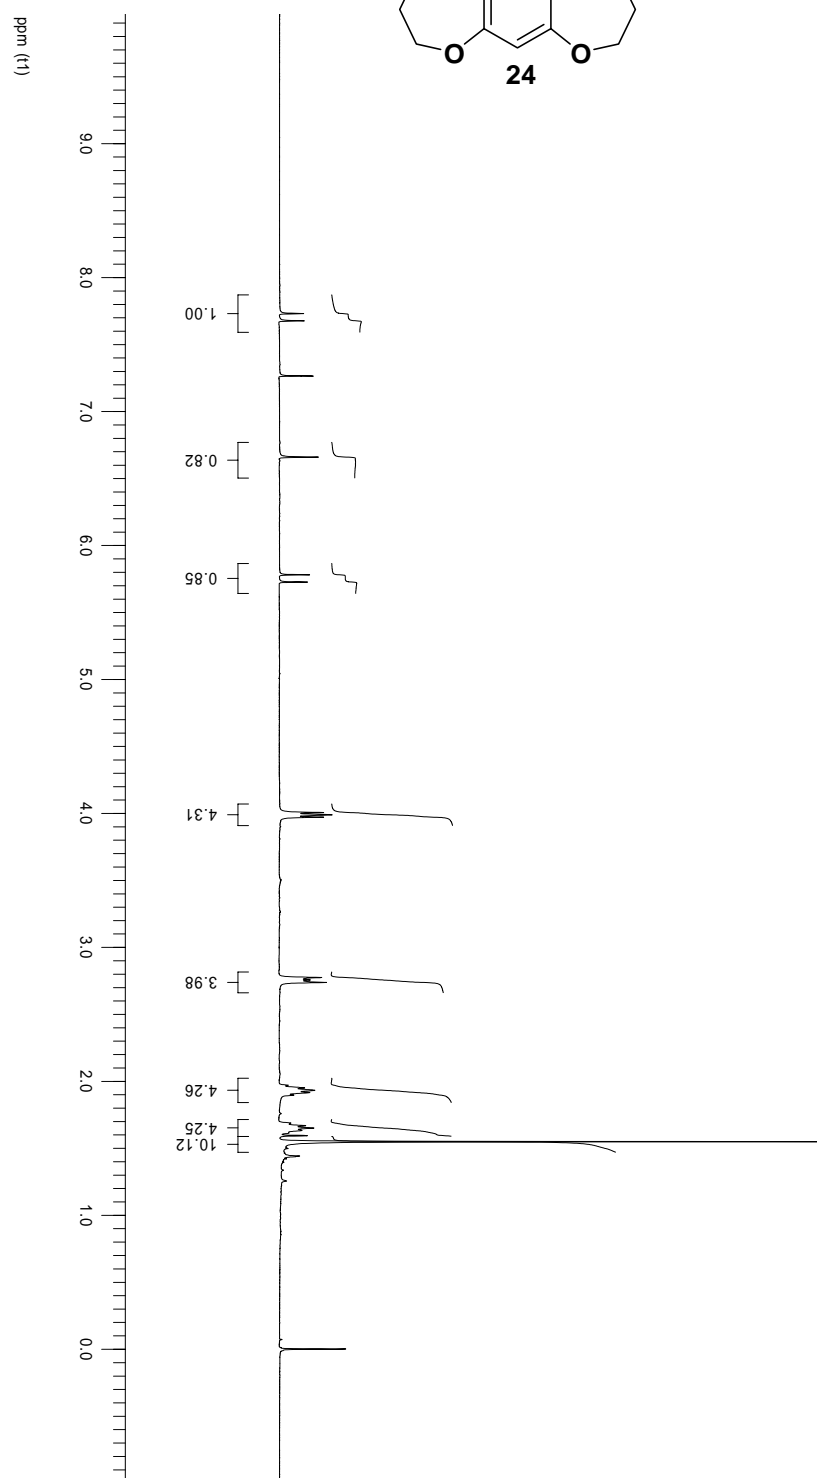

<sup>13</sup>C NMR (75 MHz, CDCl<sub>3</sub>)

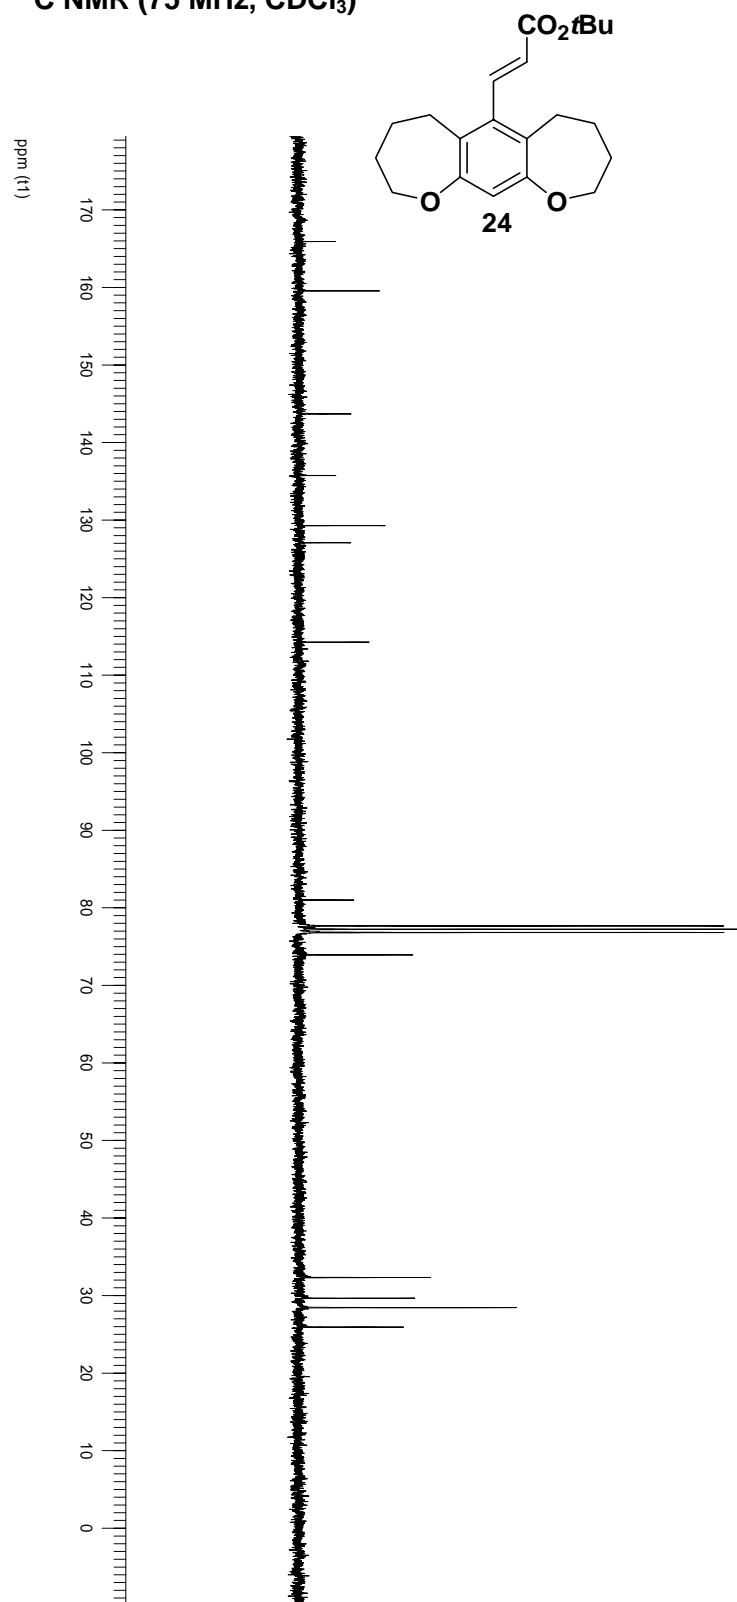



<sup>1</sup>H NMR (300 MHz, CDCl<sub>3</sub>)

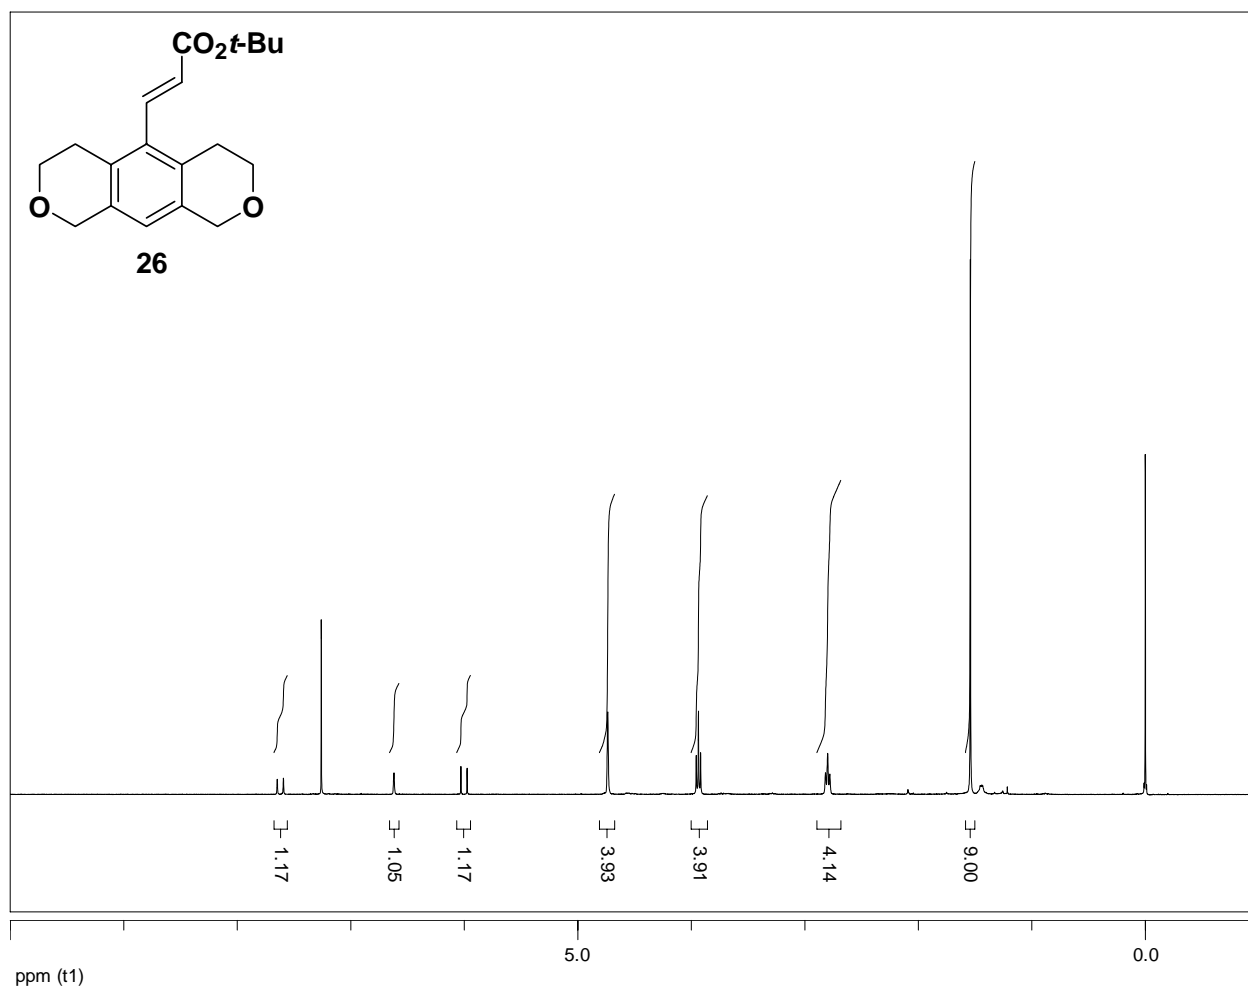

<sup>13</sup>C NMR (75 MHz, CDCl<sub>3</sub>)

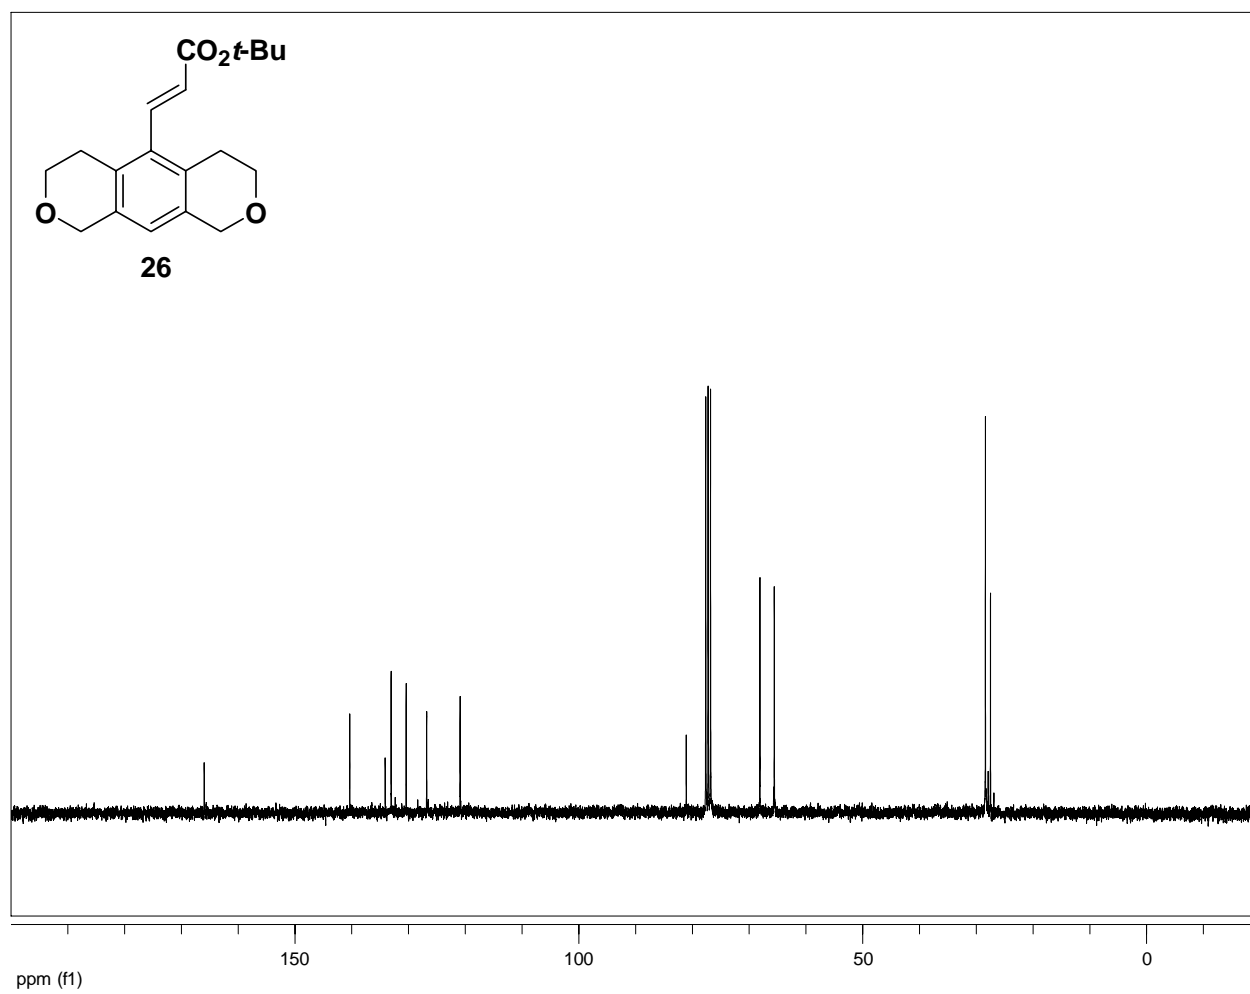

<sup>1</sup>H NMR (400 MHz, CDCl<sub>3</sub>)

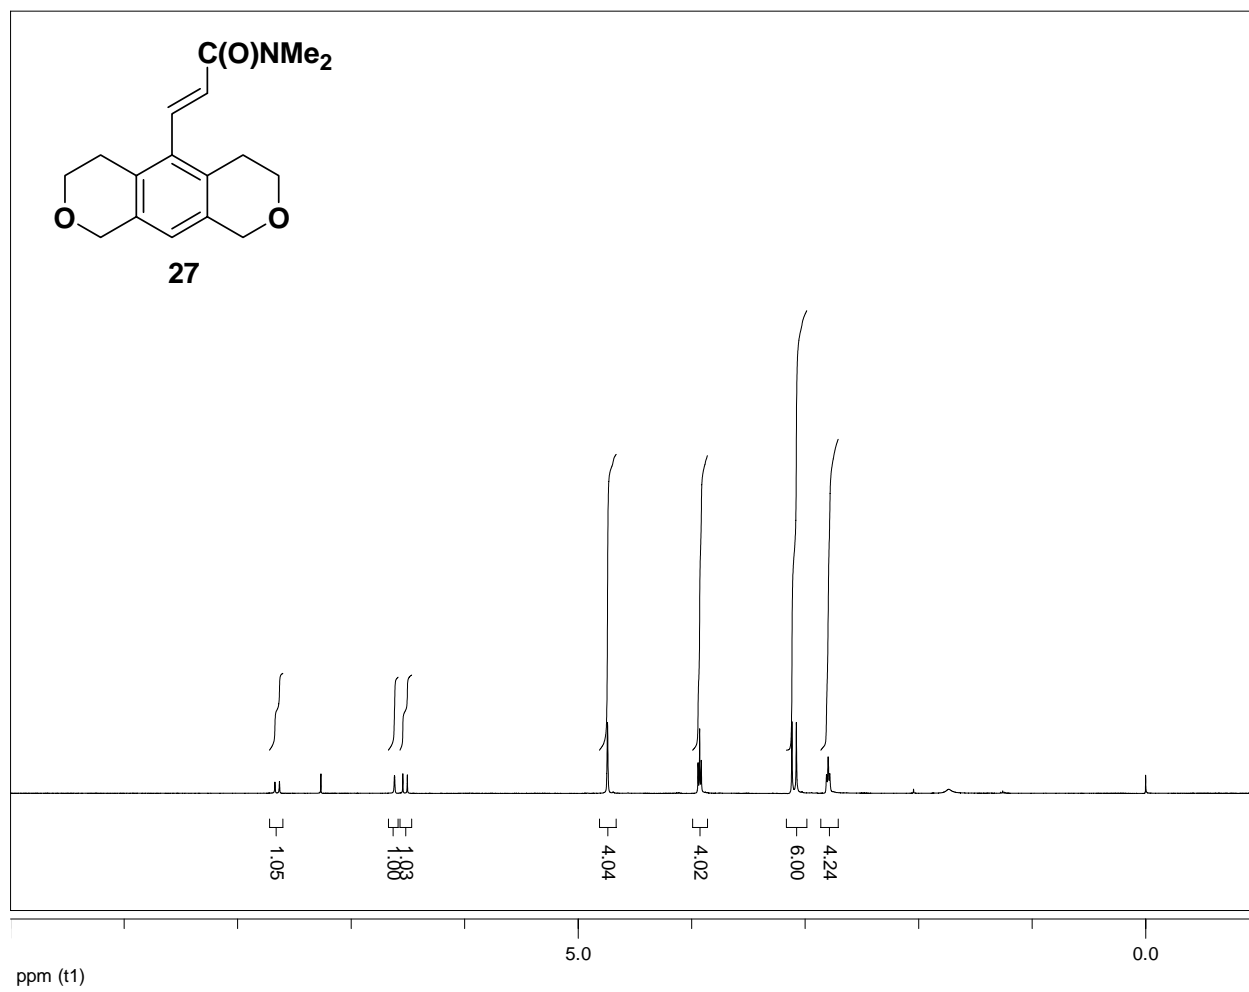

$^{13}\text{C}$  NMR (75 MHz,  $\text{CDCl}_3$ )

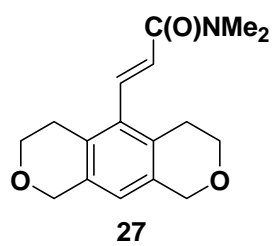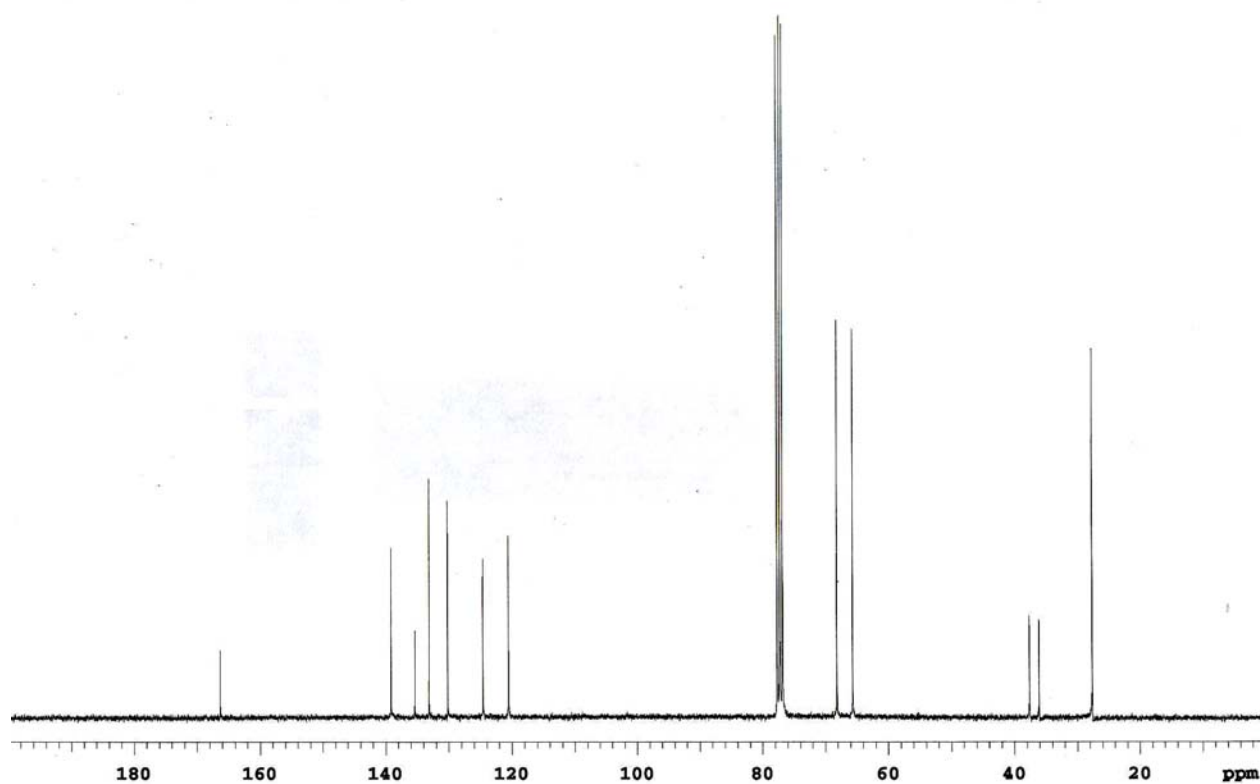

<sup>1</sup>H NMR (300 MHz, CDCl<sub>3</sub>)

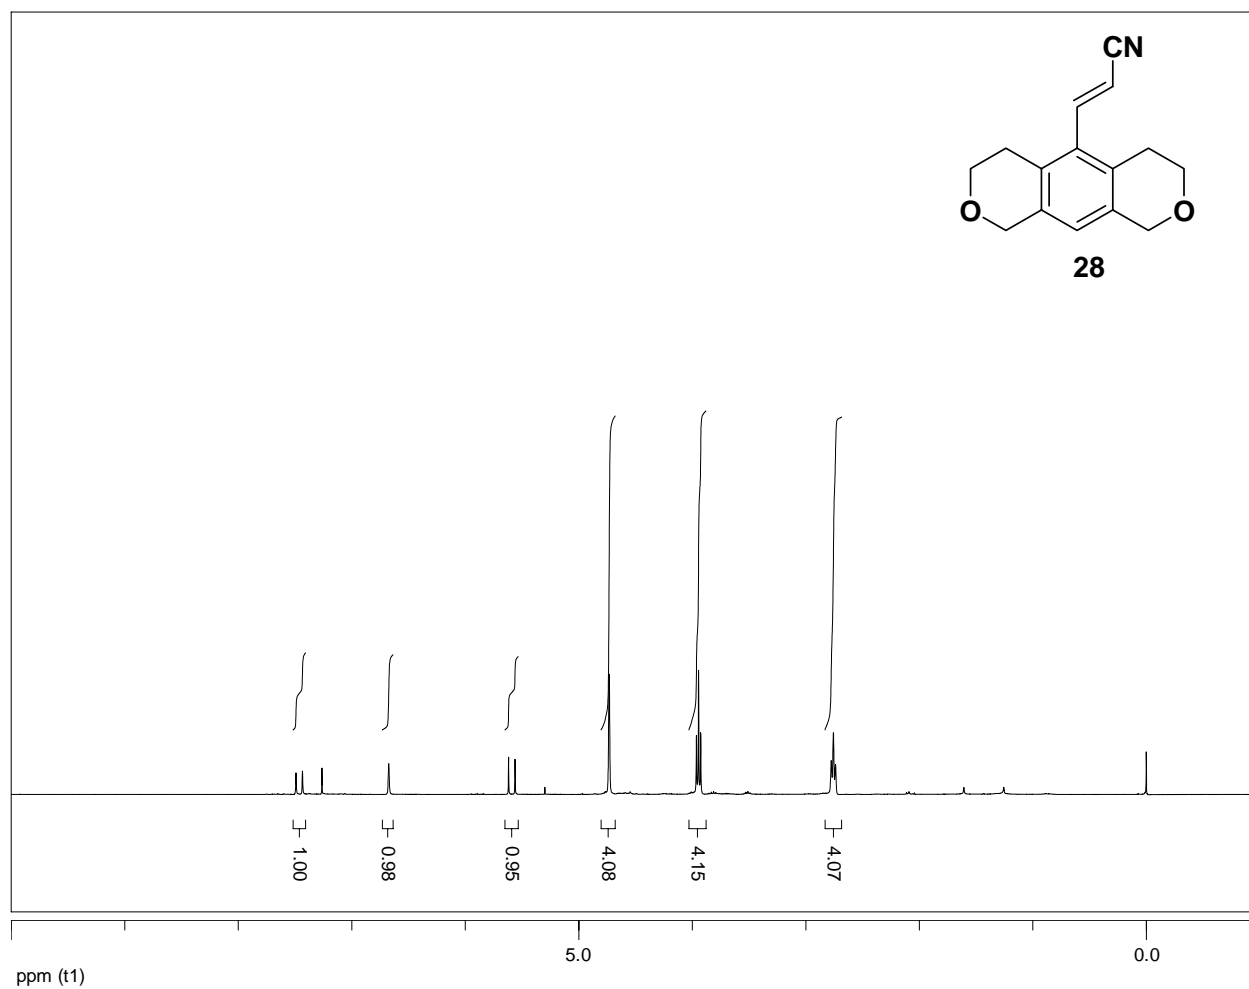

**$^{13}\text{C}$  NMR (100 MHz,  $\text{CDCl}_3$ )**

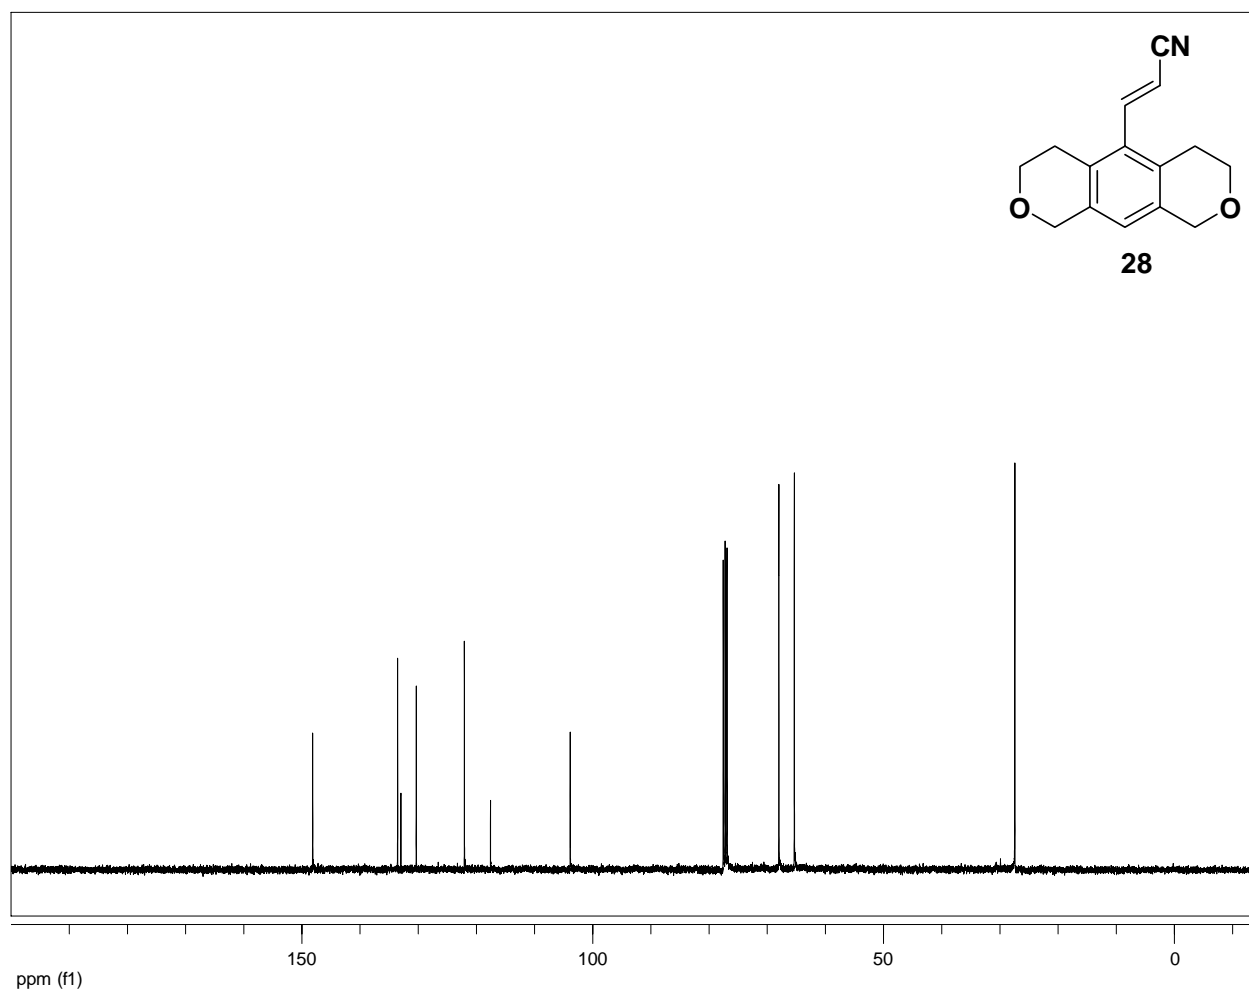

<sup>1</sup>H NMR (300 MHz, CDCl<sub>3</sub>)

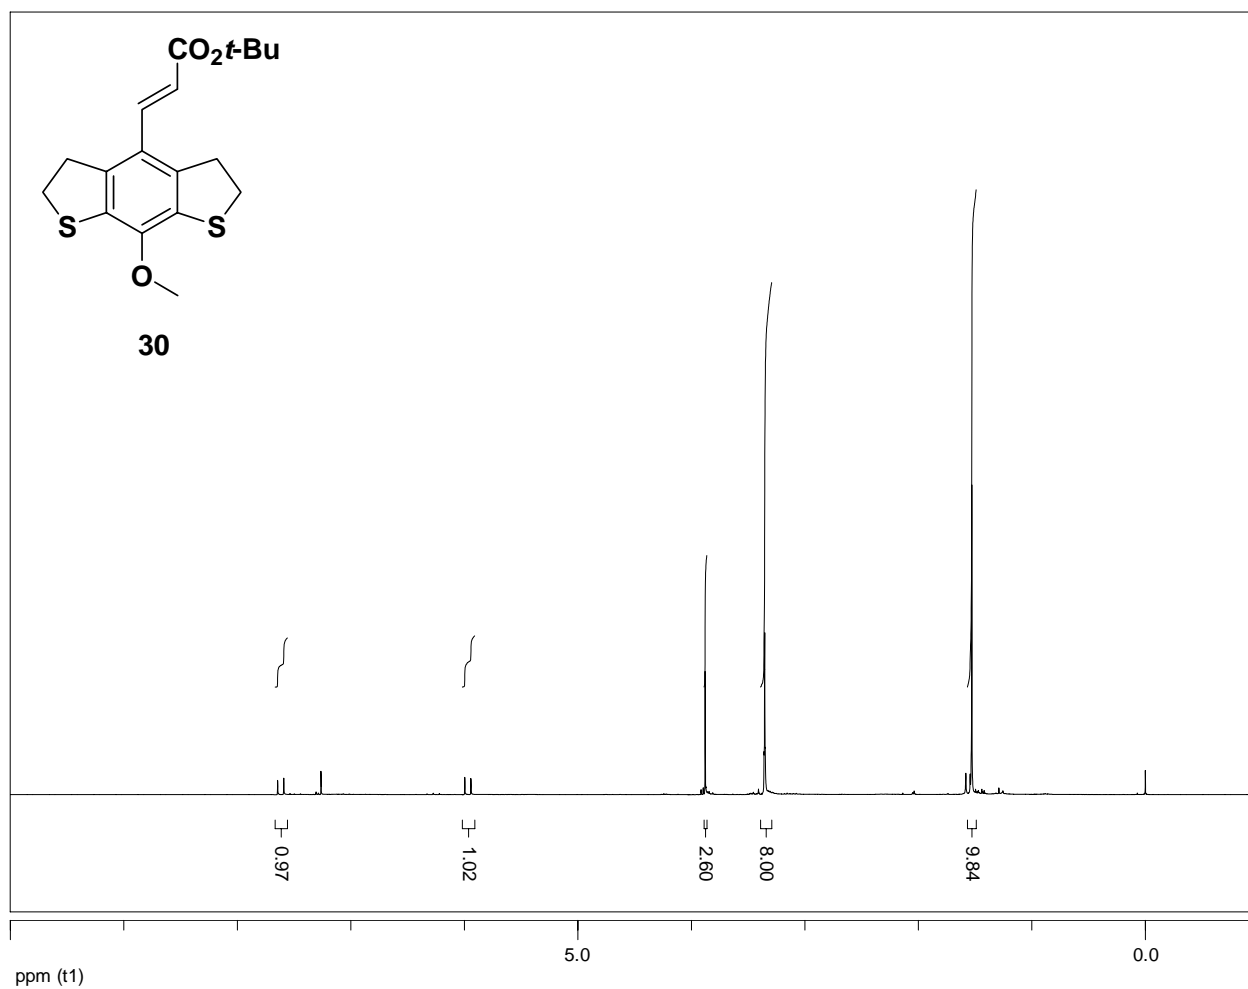

<sup>13</sup>C NMR (75 MHz, CDCl<sub>3</sub>)

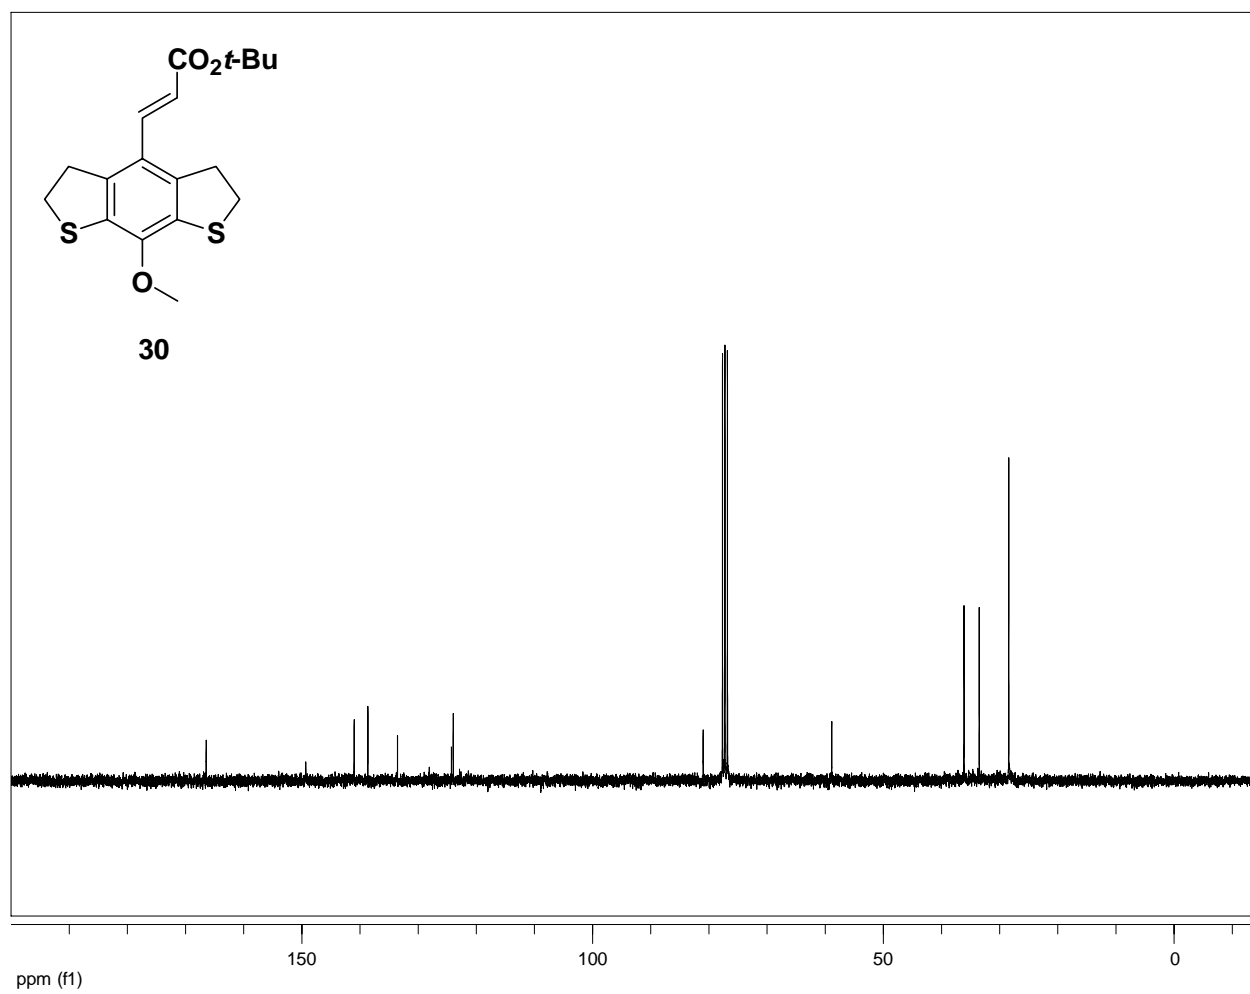



<sup>1</sup>H NMR (300 MHz, CDCl<sub>3</sub>)

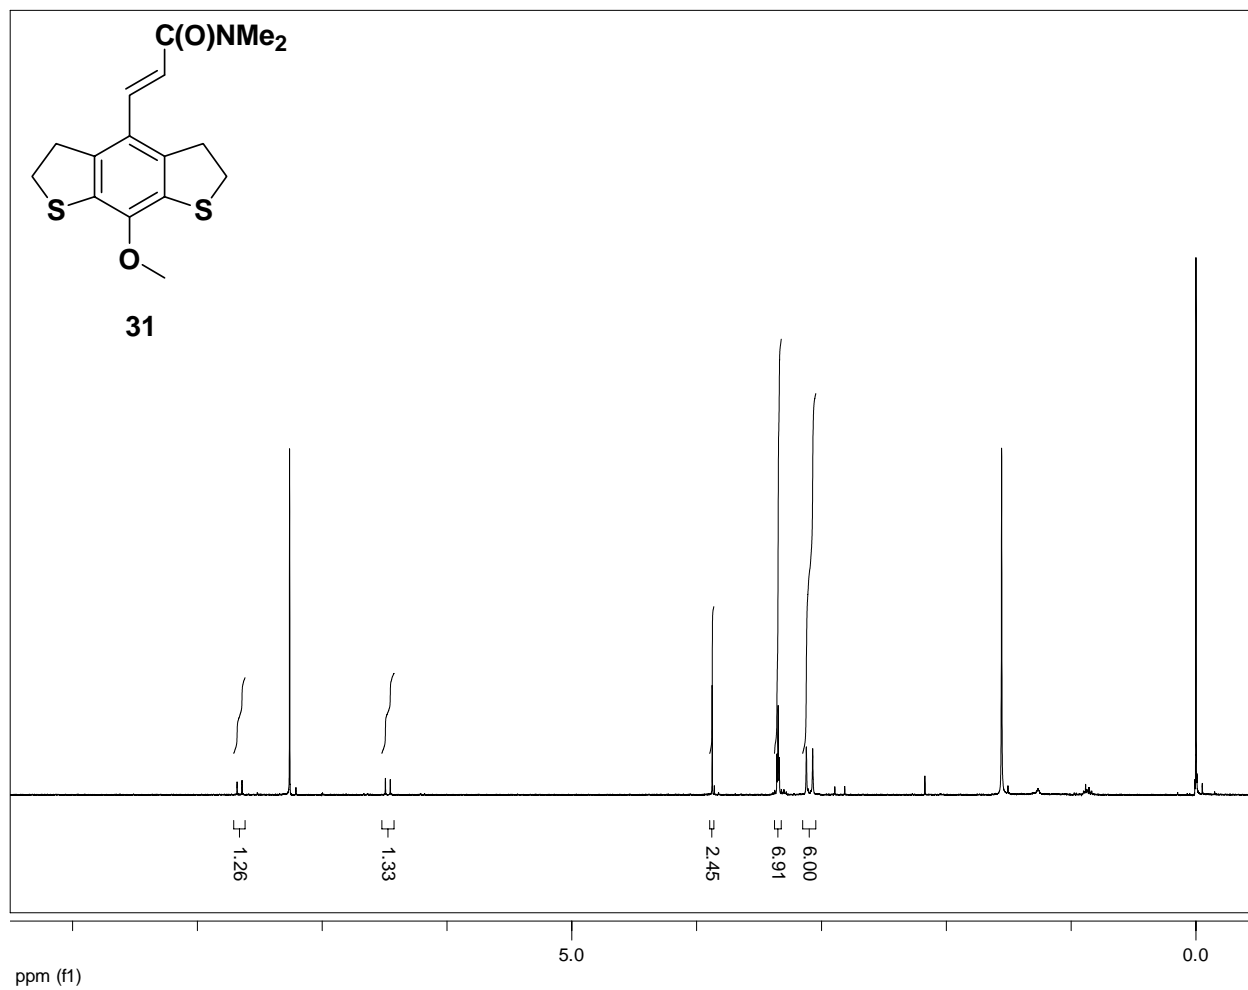

**$^{13}\text{C}$  NMR (100 MHz,  $\text{CDCl}_3$ )**

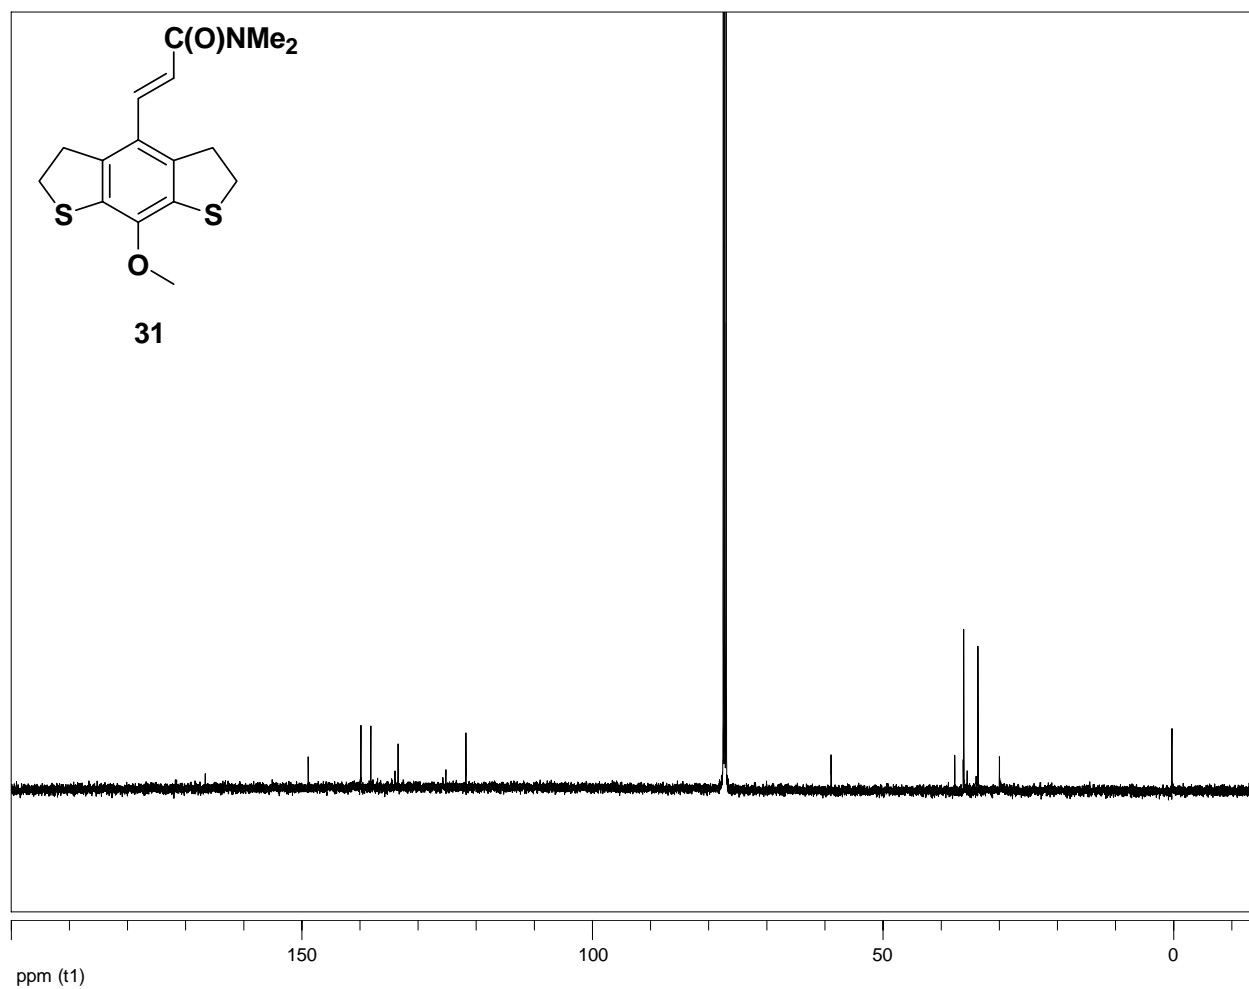

<sup>1</sup>H NMR (300 MHz, CDCl<sub>3</sub>)

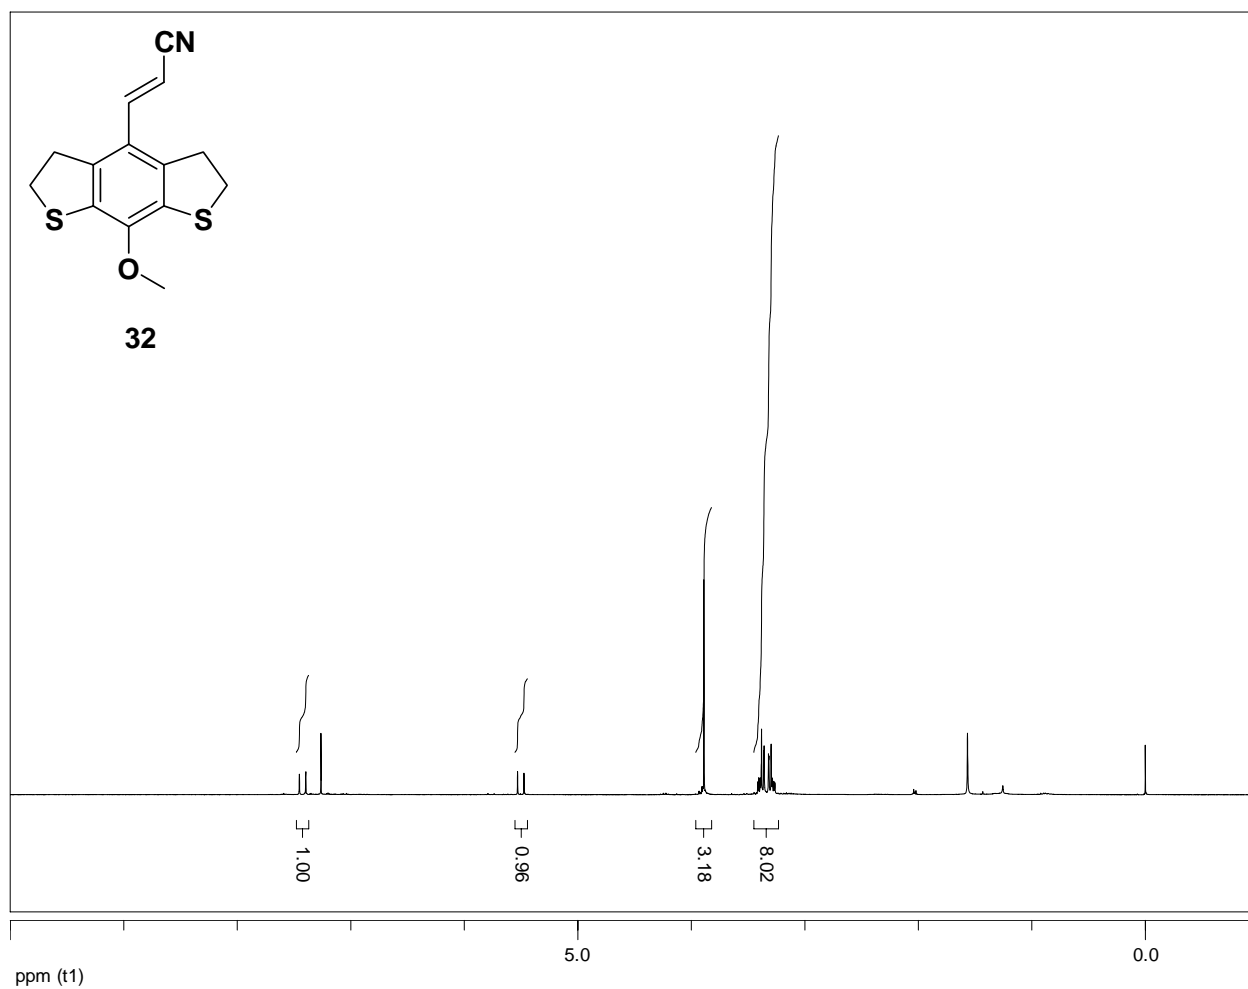

**$^{13}\text{C}$  NMR (75 MHz,  $\text{CDCl}_3$ )**

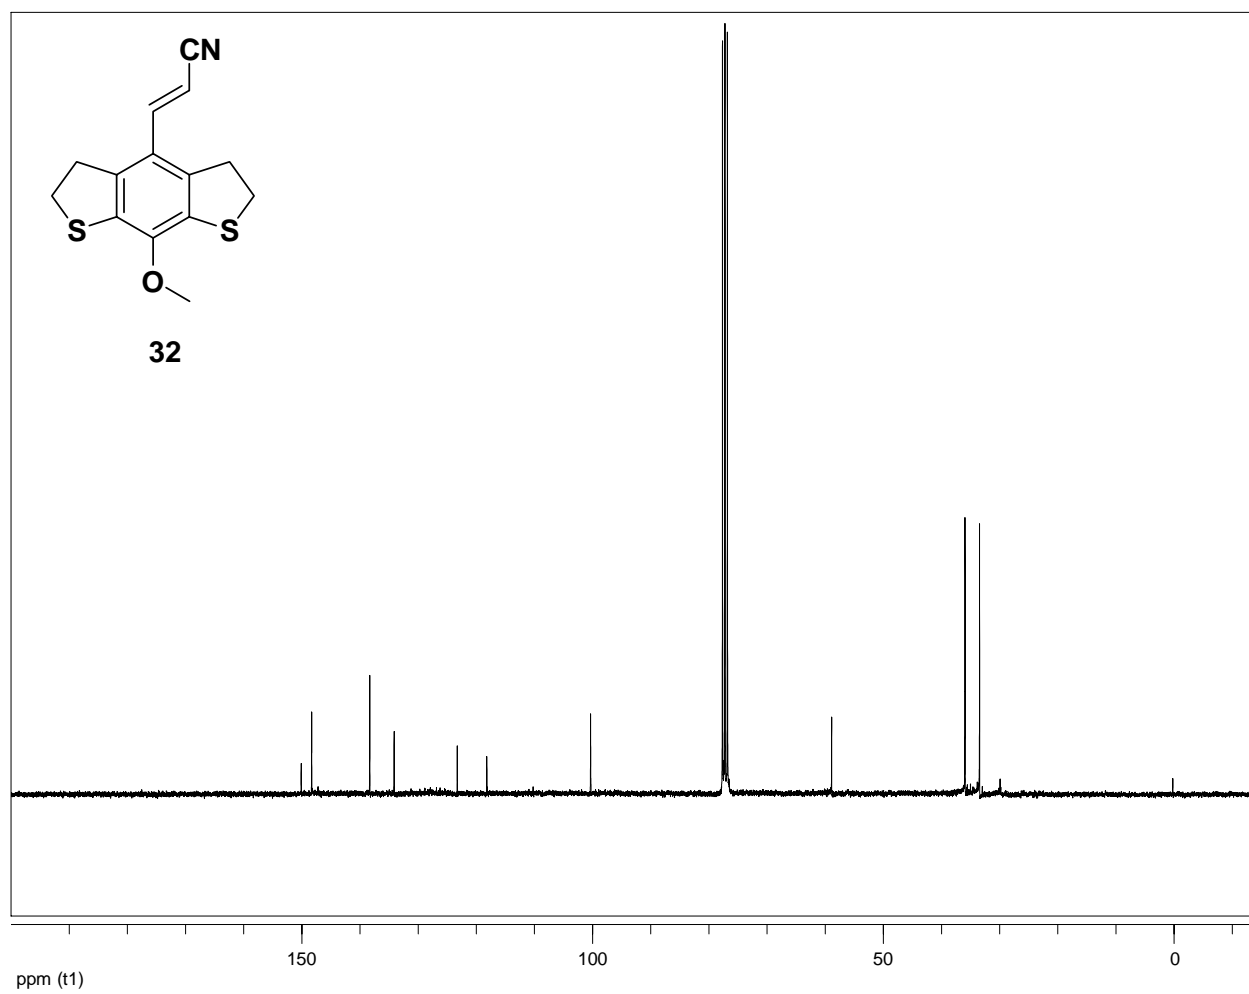

<sup>1</sup>H NMR (400 MHz, CDCl<sub>3</sub>)

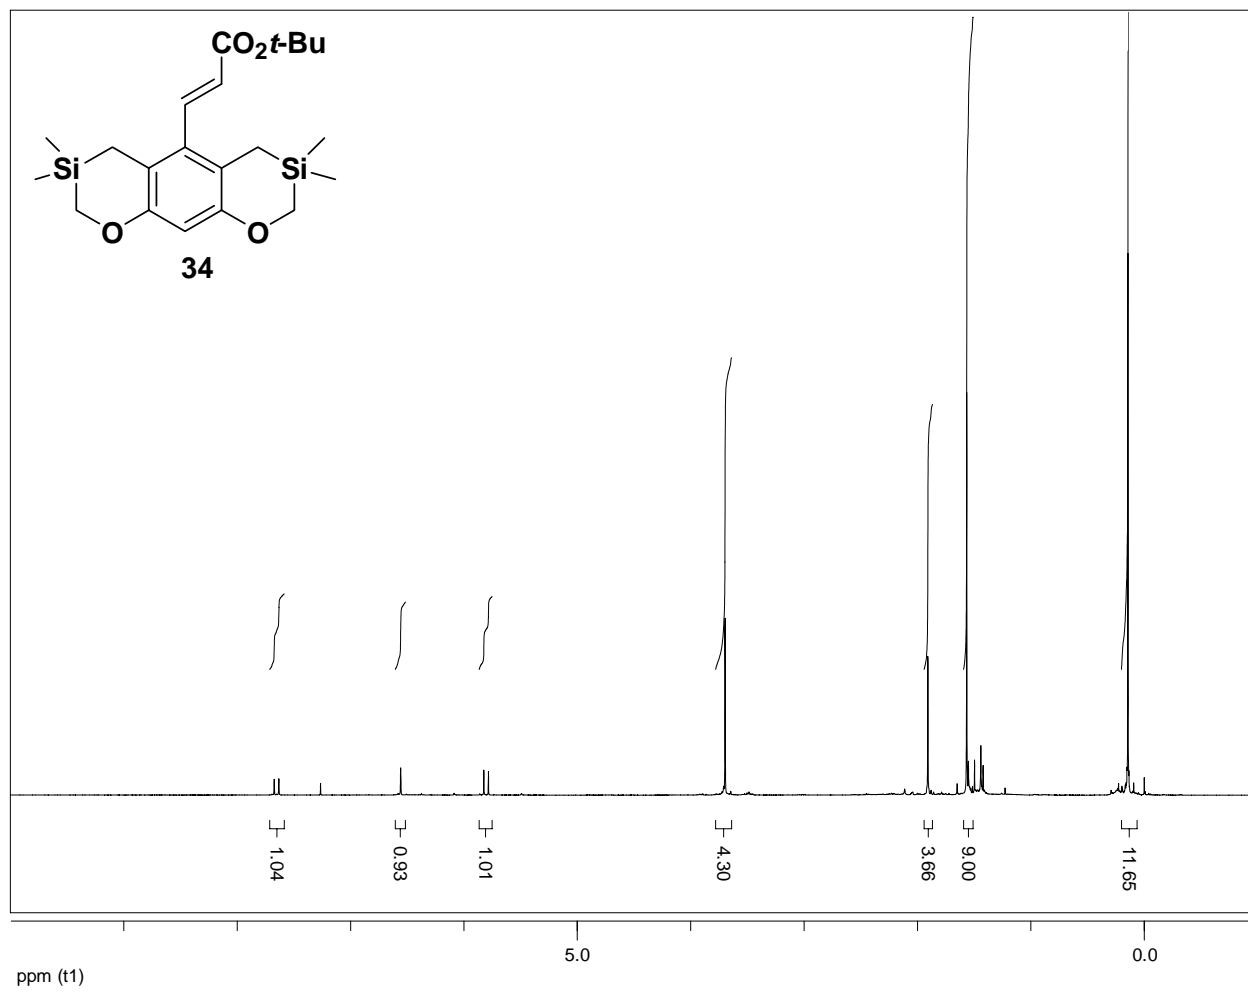

<sup>13</sup>C NMR (100 MHz, CDCl<sub>3</sub>)

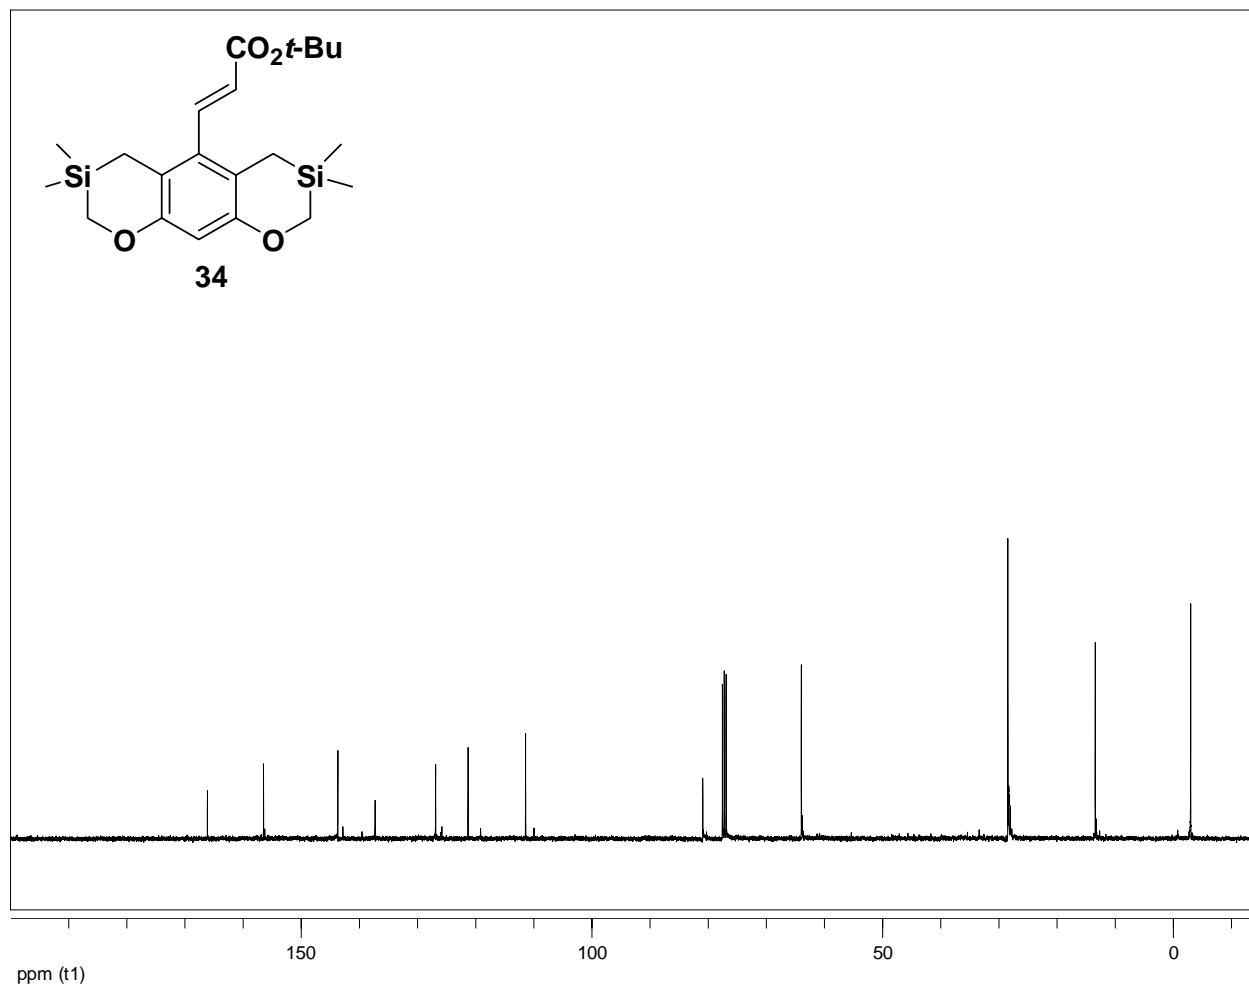

<sup>1</sup>H NMR (400 MHz, CDCl<sub>3</sub>)

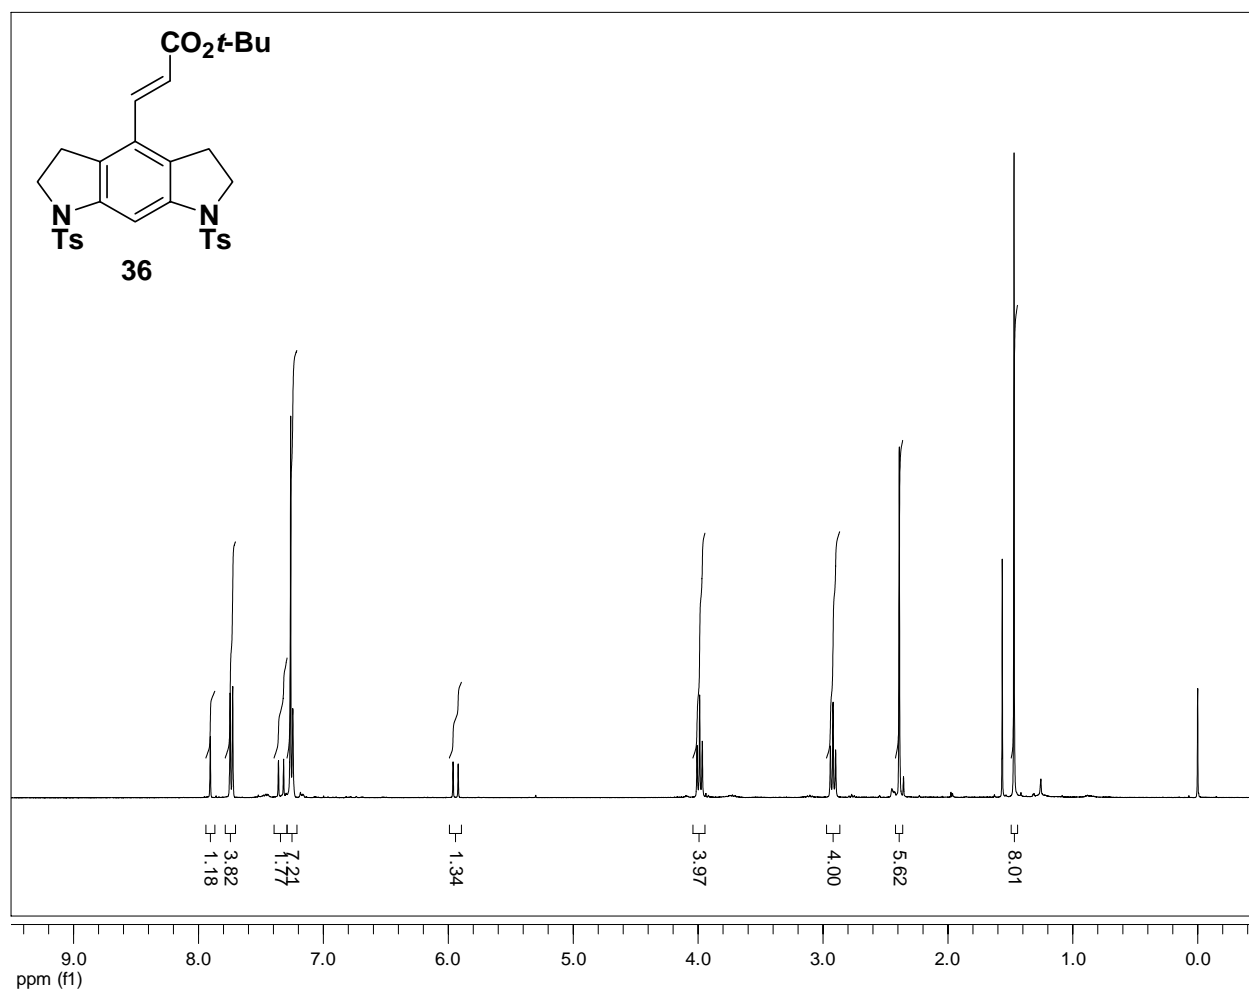

**$^{13}\text{C}$  NMR (100 MHz,  $\text{CDCl}_3$ )**

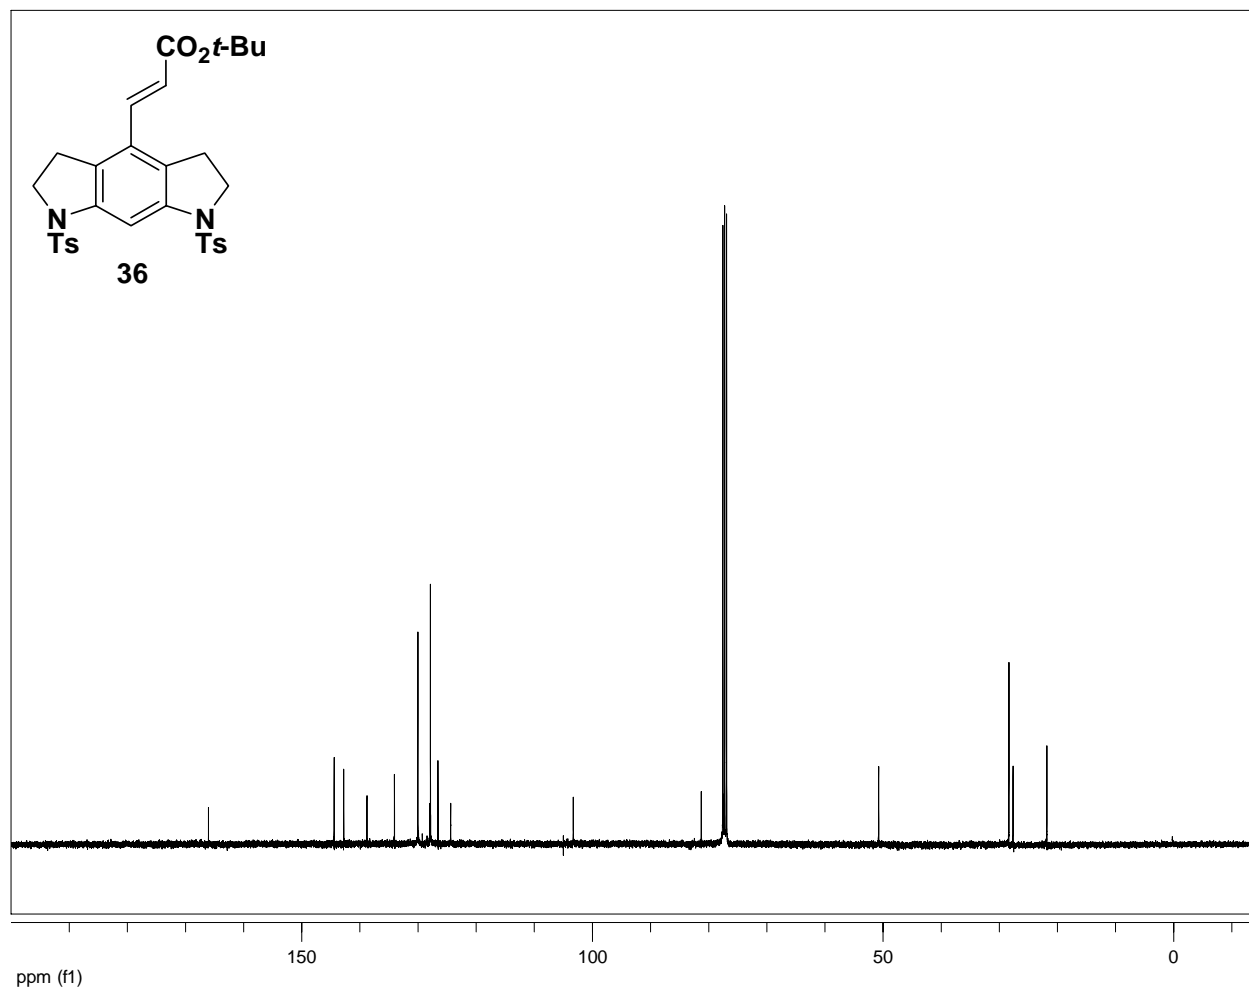



<sup>1</sup>H NMR (400 MHz, CDCl<sub>3</sub>)

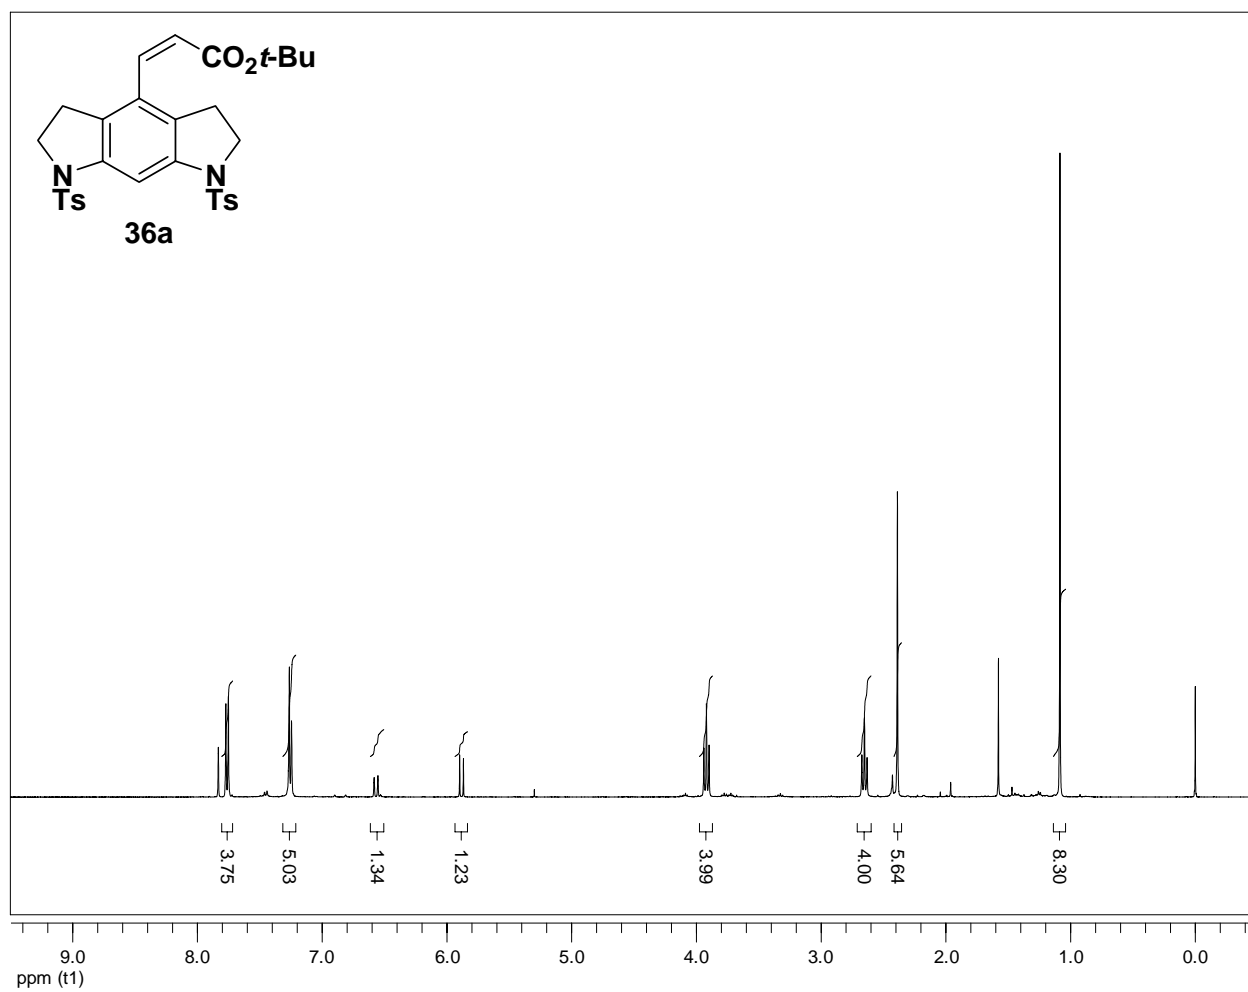

<sup>13</sup>C NMR (100 MHz, CDCl<sub>3</sub>)

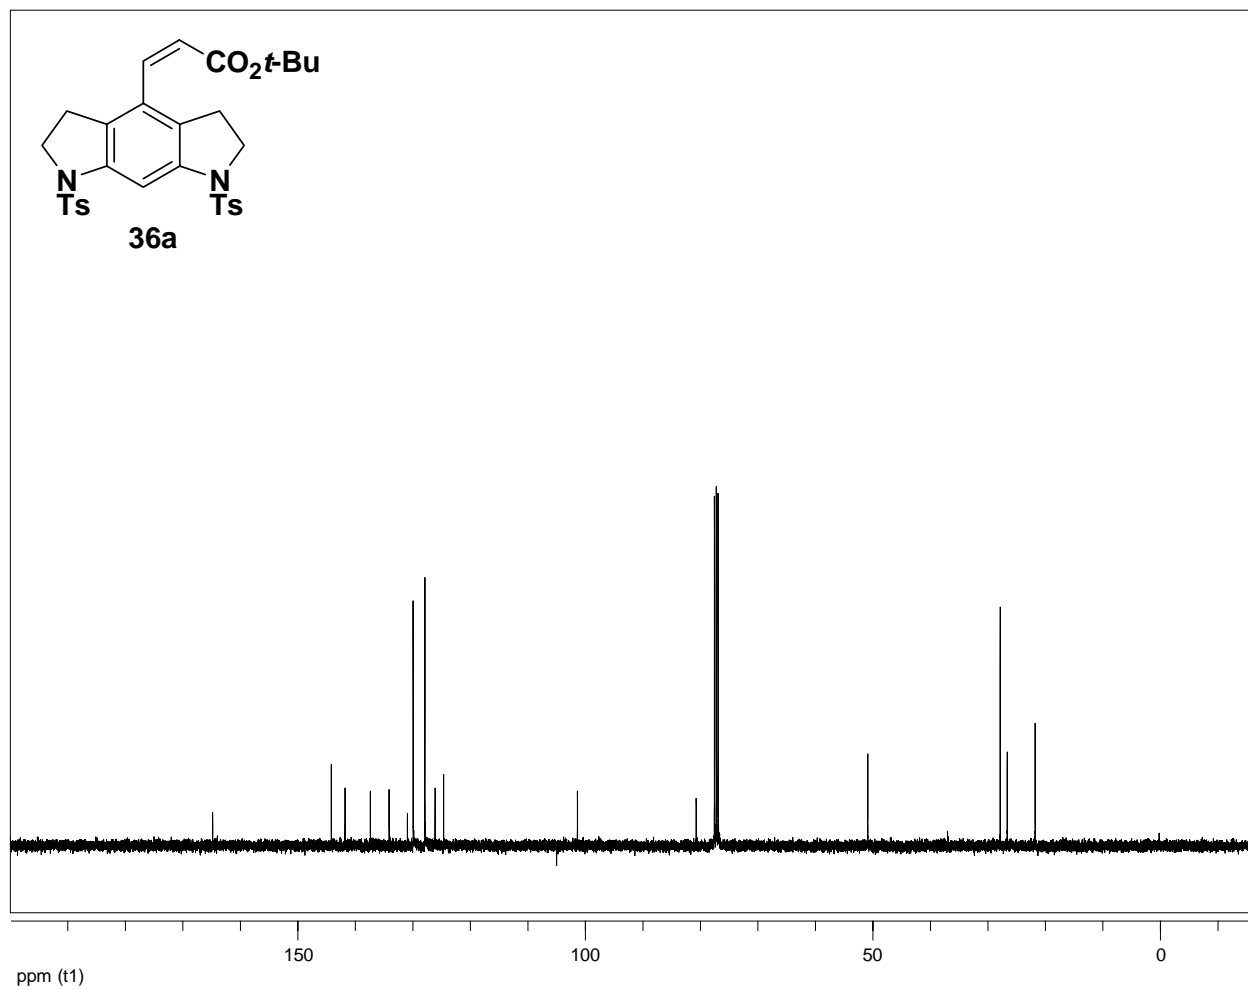

<sup>1</sup>H NMR (300 MHz, CDCl<sub>3</sub>)

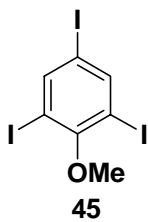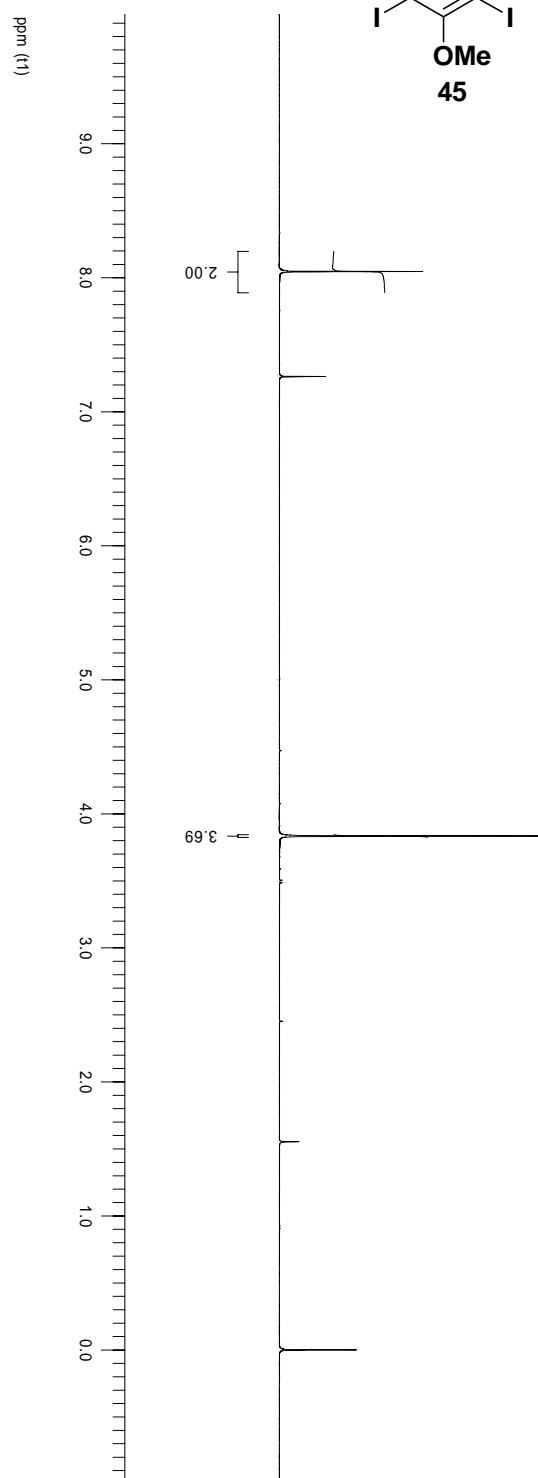

<sup>13</sup>C NMR (75 MHz, CDCl<sub>3</sub>)

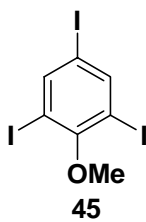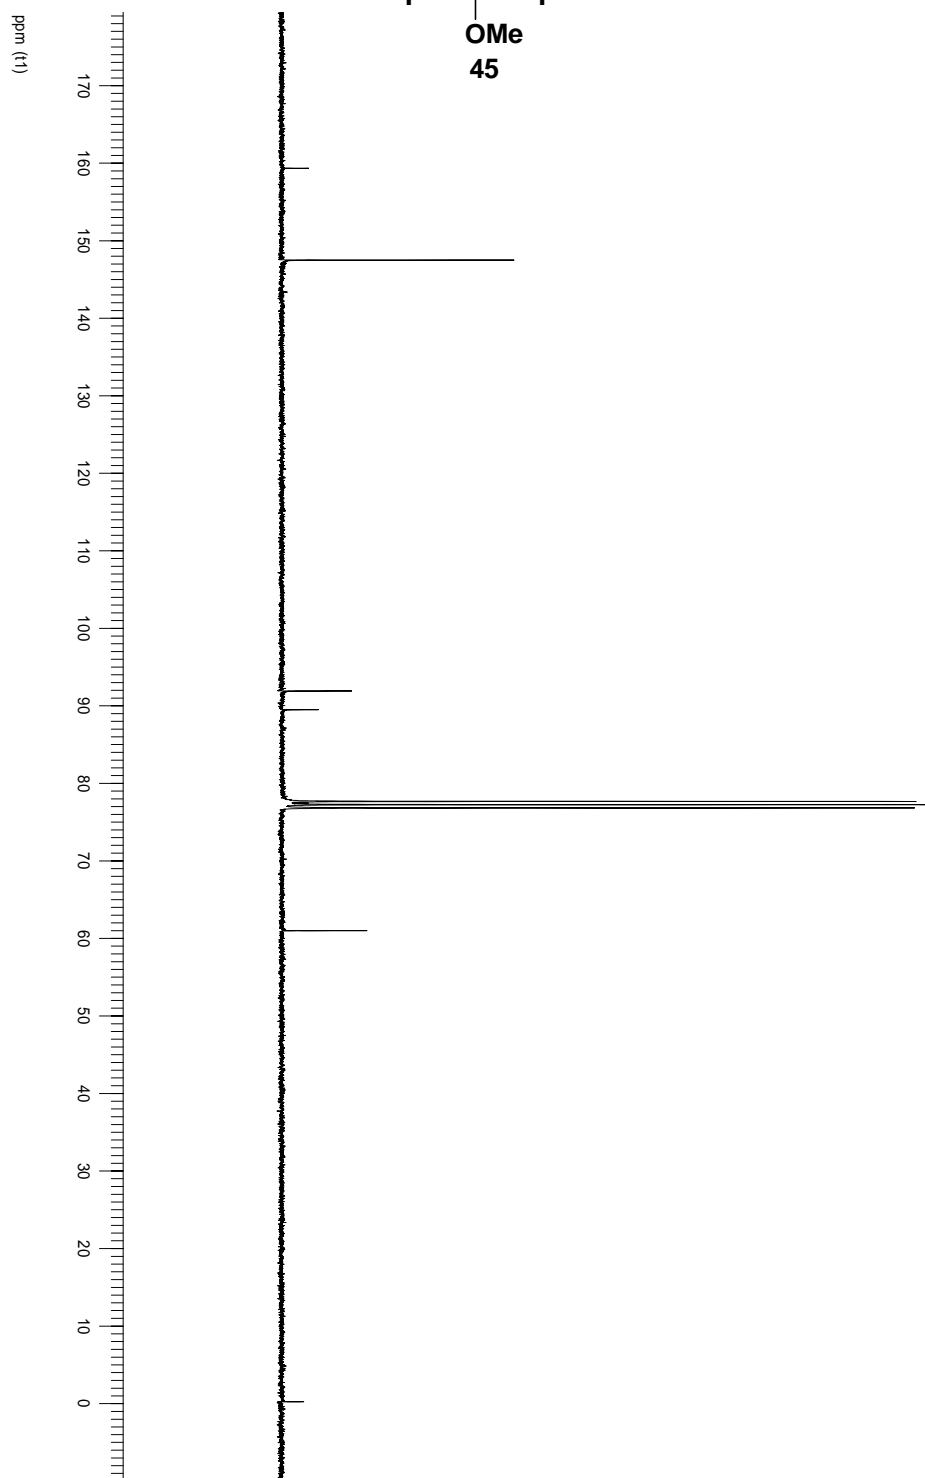

$^1\text{H}$  NMR (300 MHz,  $\text{CDCl}_3$ )

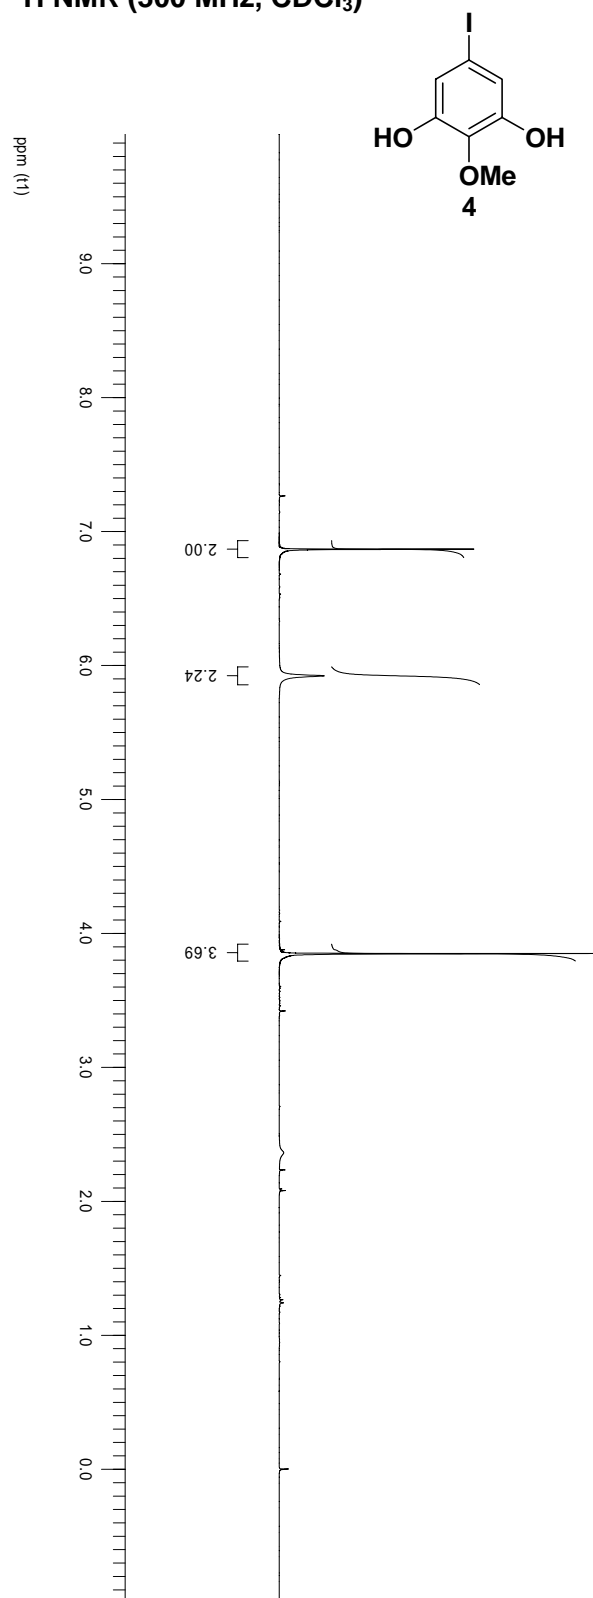

<sup>13</sup>C NMR (75 MHz, CDCl<sub>3</sub>)

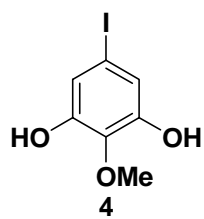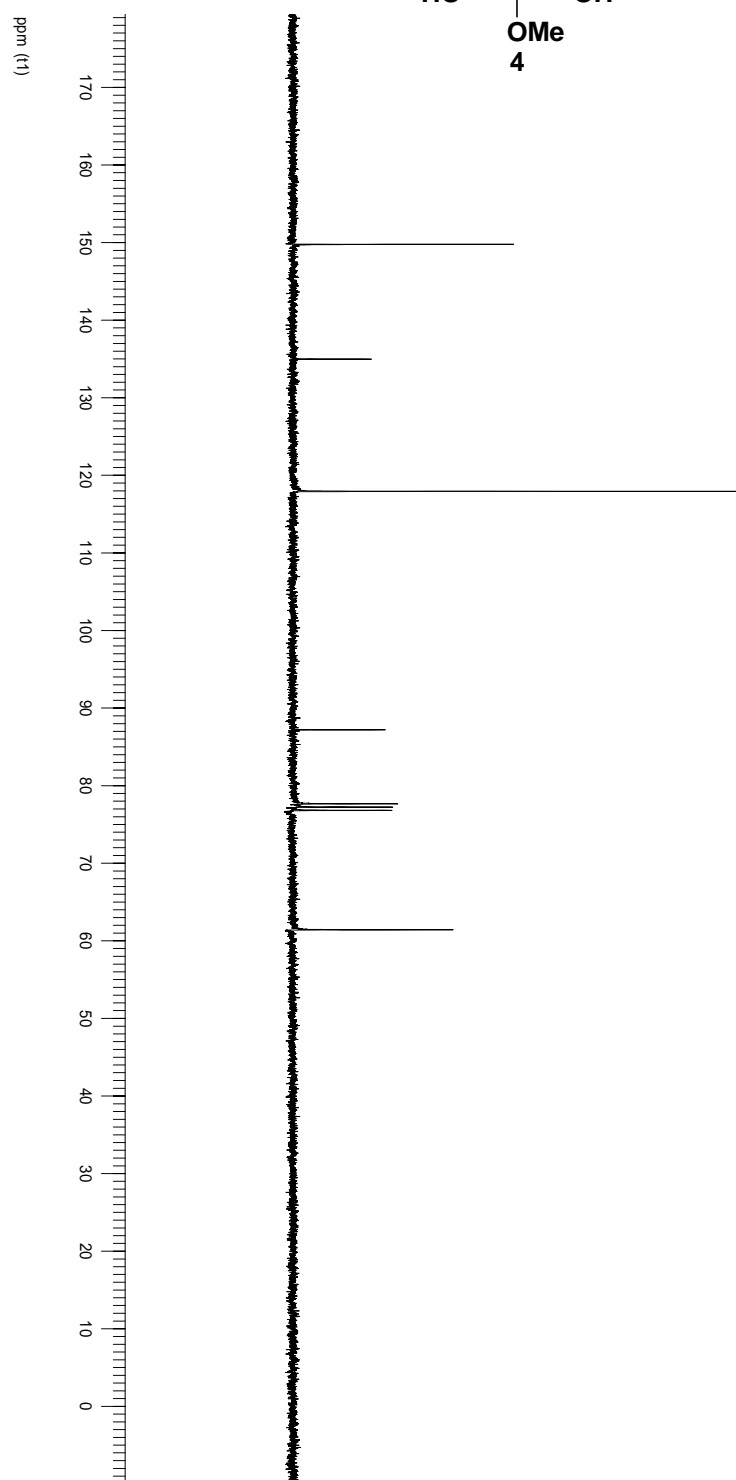

<sup>1</sup>H NMR (300 MHz, CDCl<sub>3</sub>)

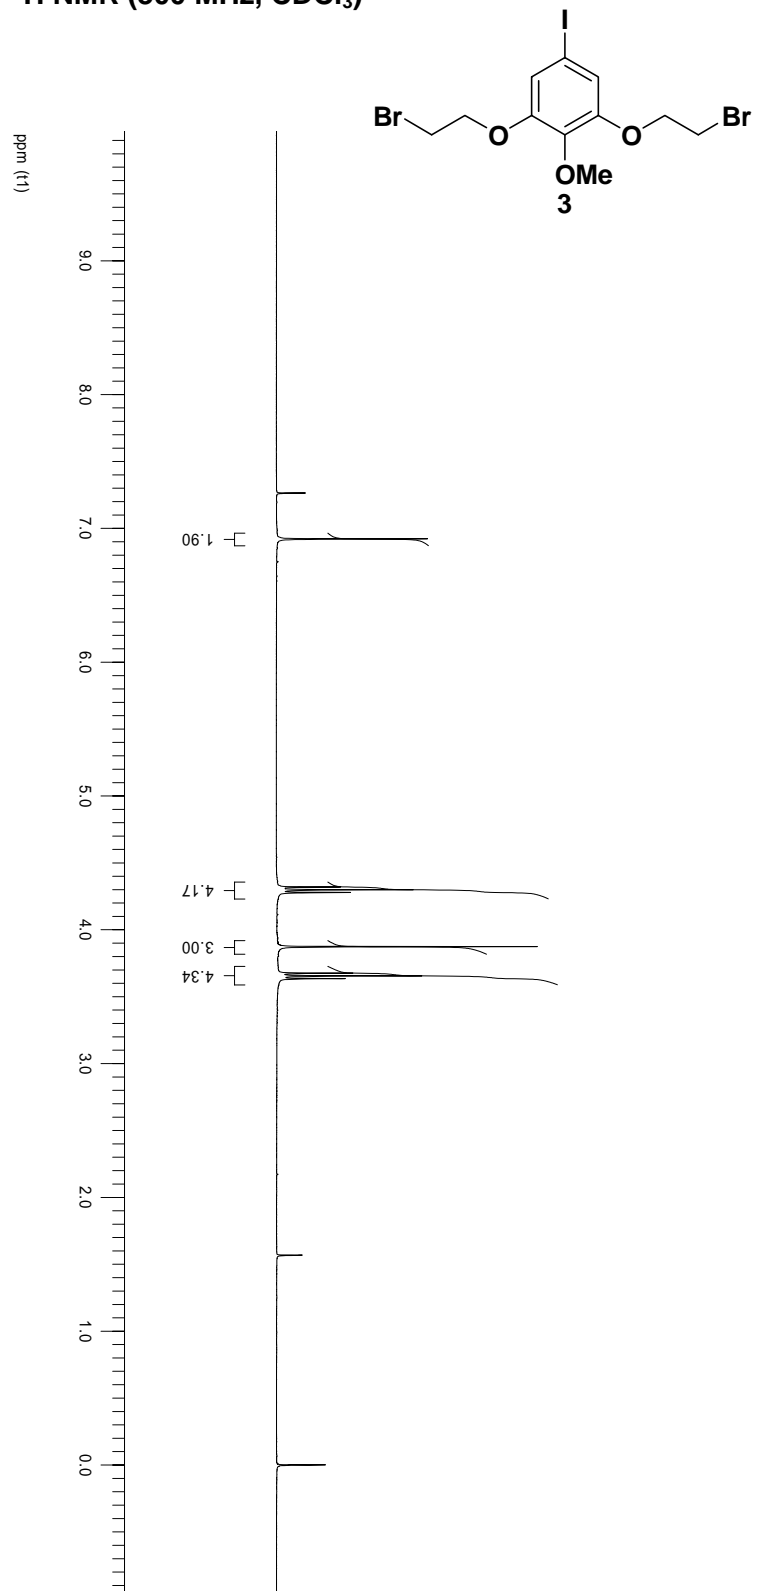

**$^{13}\text{C}$  NMR (75 MHz,  $\text{CDCl}_3$ )**

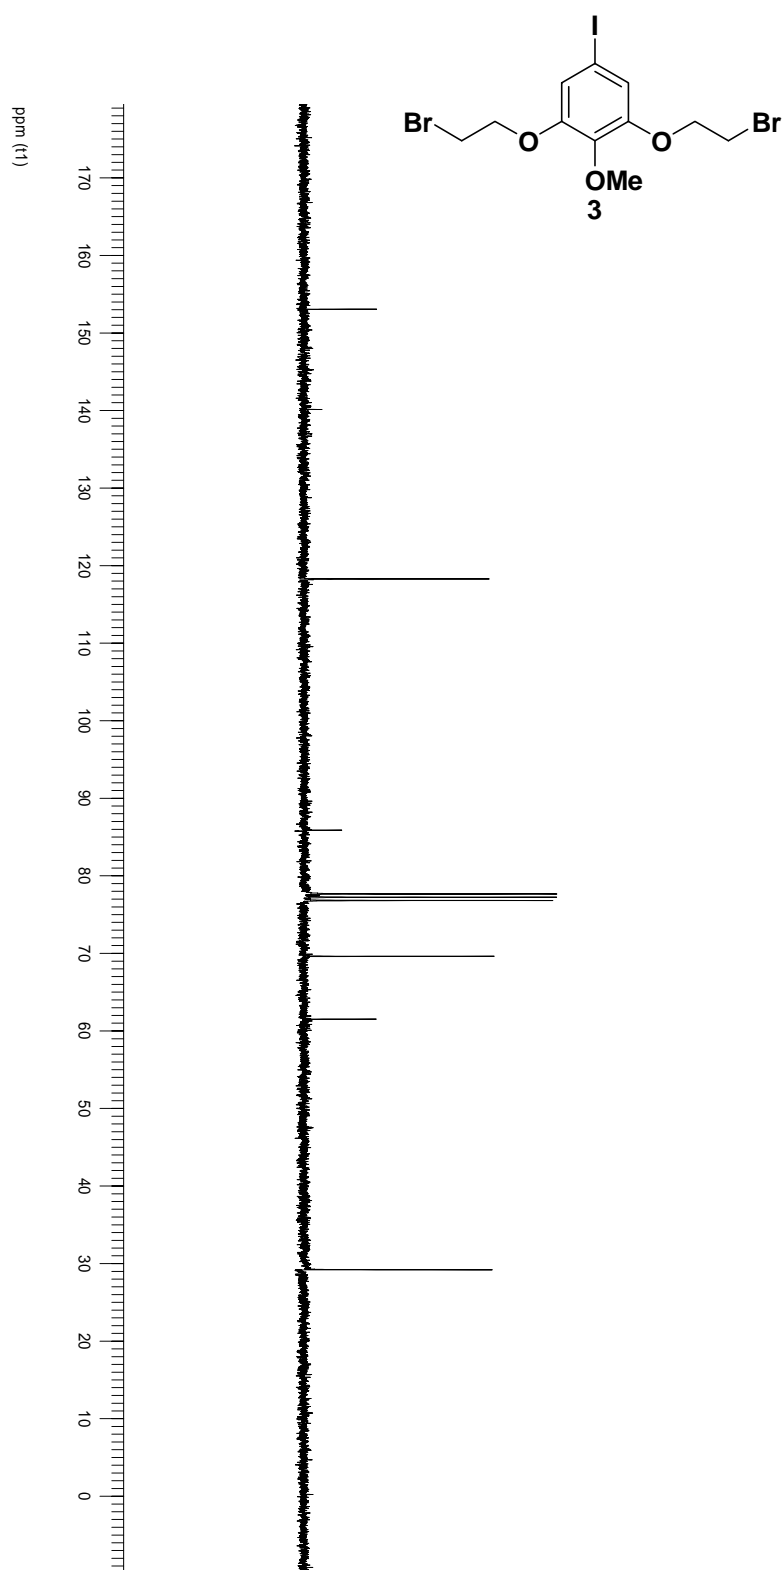



$^1\text{H}$  NMR (300 MHz,  $\text{CDCl}_3$ )

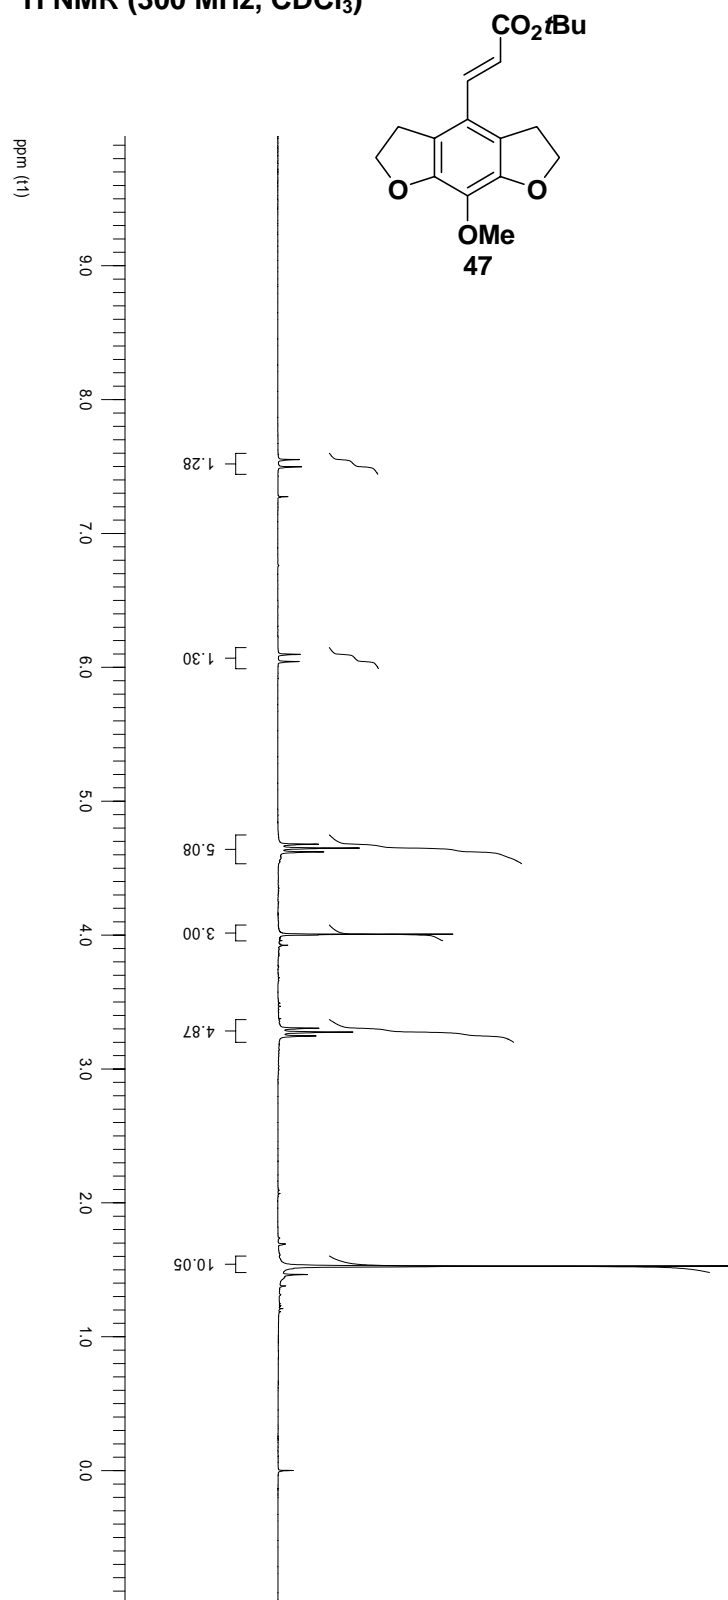

<sup>13</sup>C NMR (75 MHz, CDCl<sub>3</sub>)

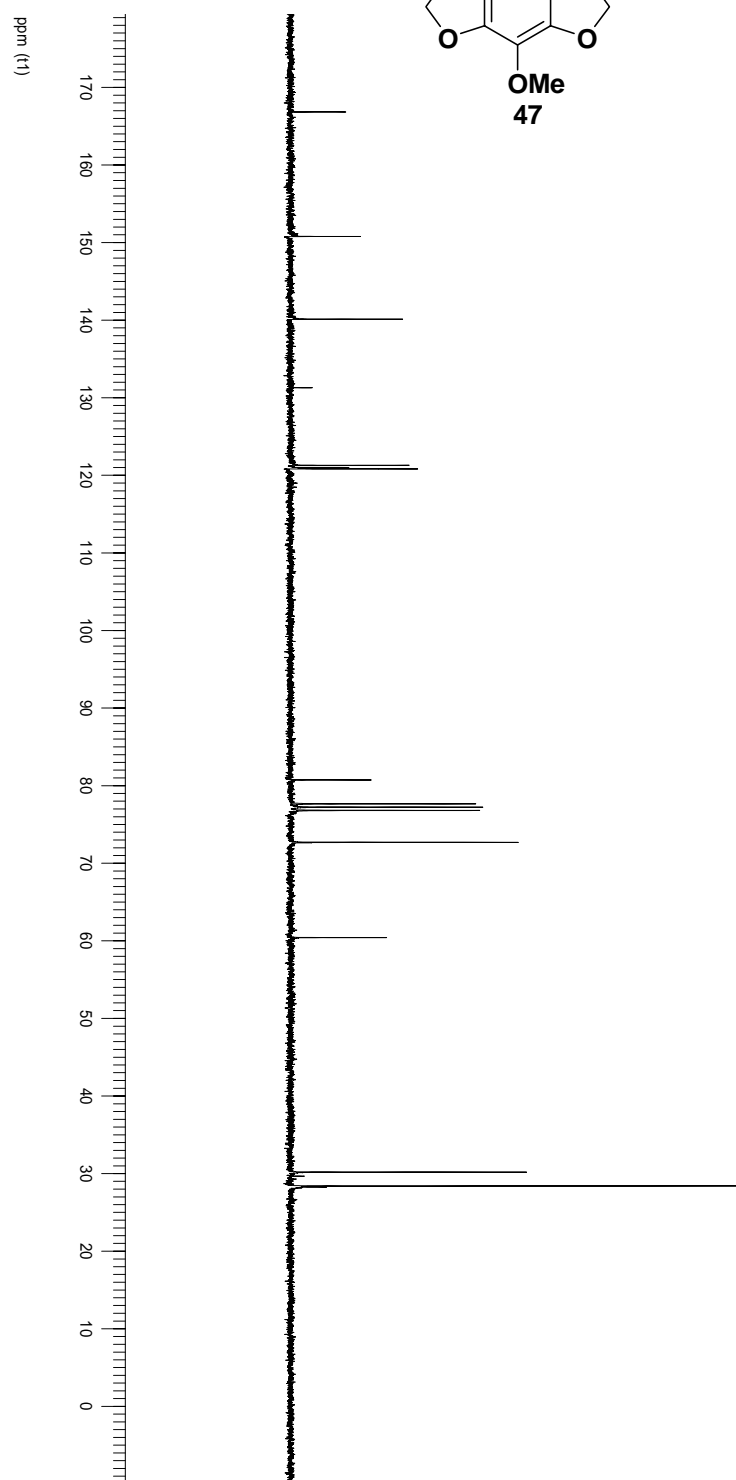

<sup>1</sup>H NMR (300 MHz, CDCl<sub>3</sub>)

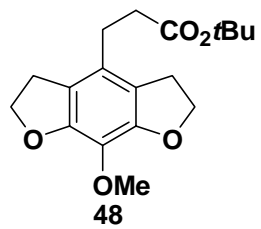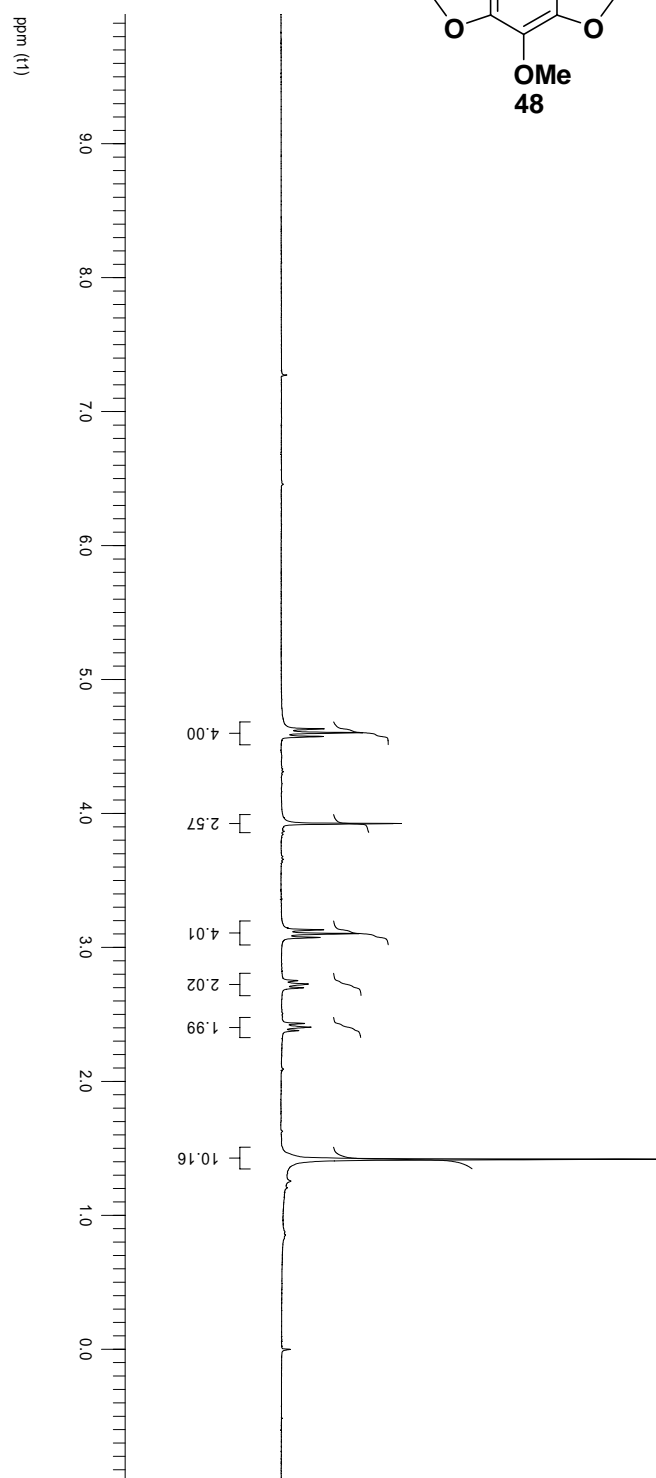

<sup>13</sup>C NMR (75 MHz, CDCl<sub>3</sub>)

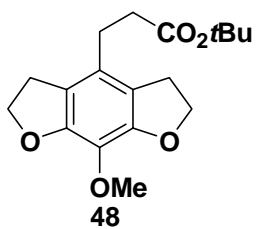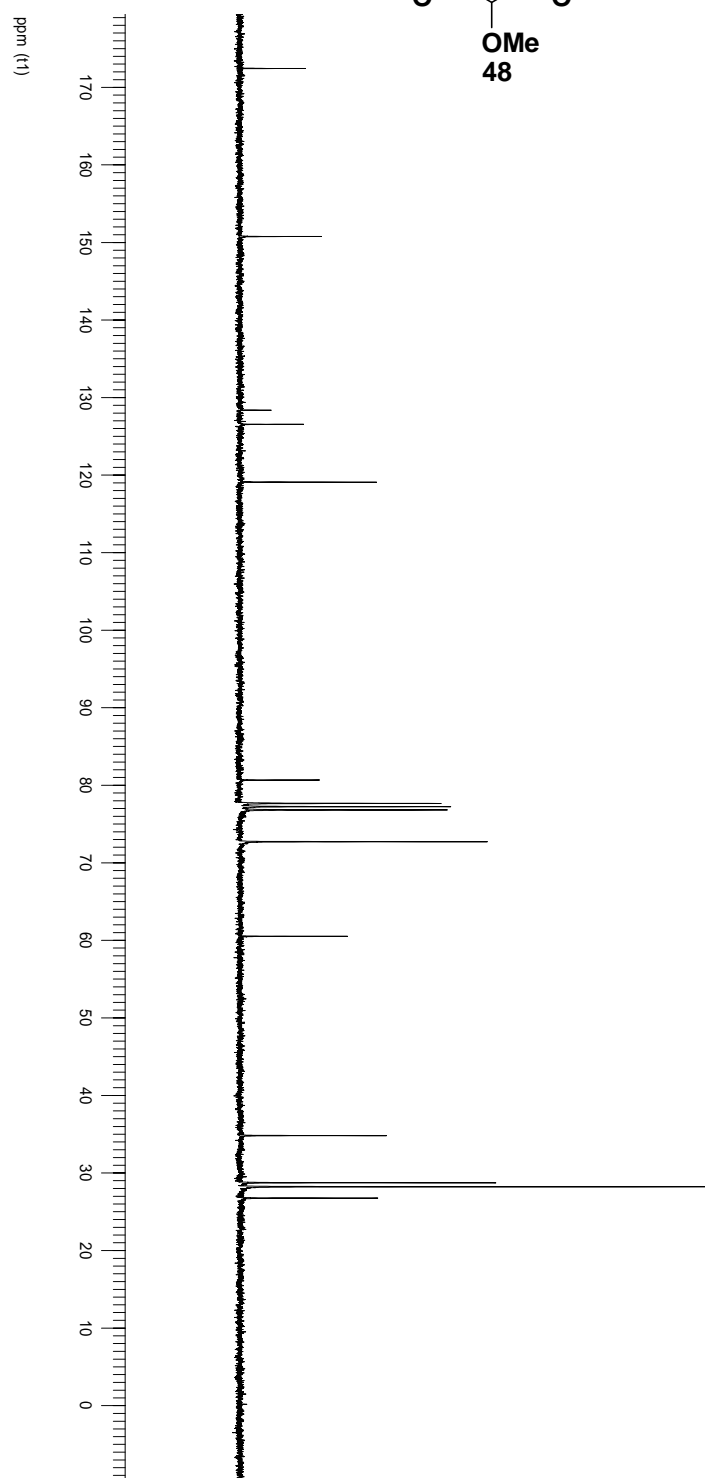

<sup>1</sup>H NMR (300 MHz, CDCl<sub>3</sub>)

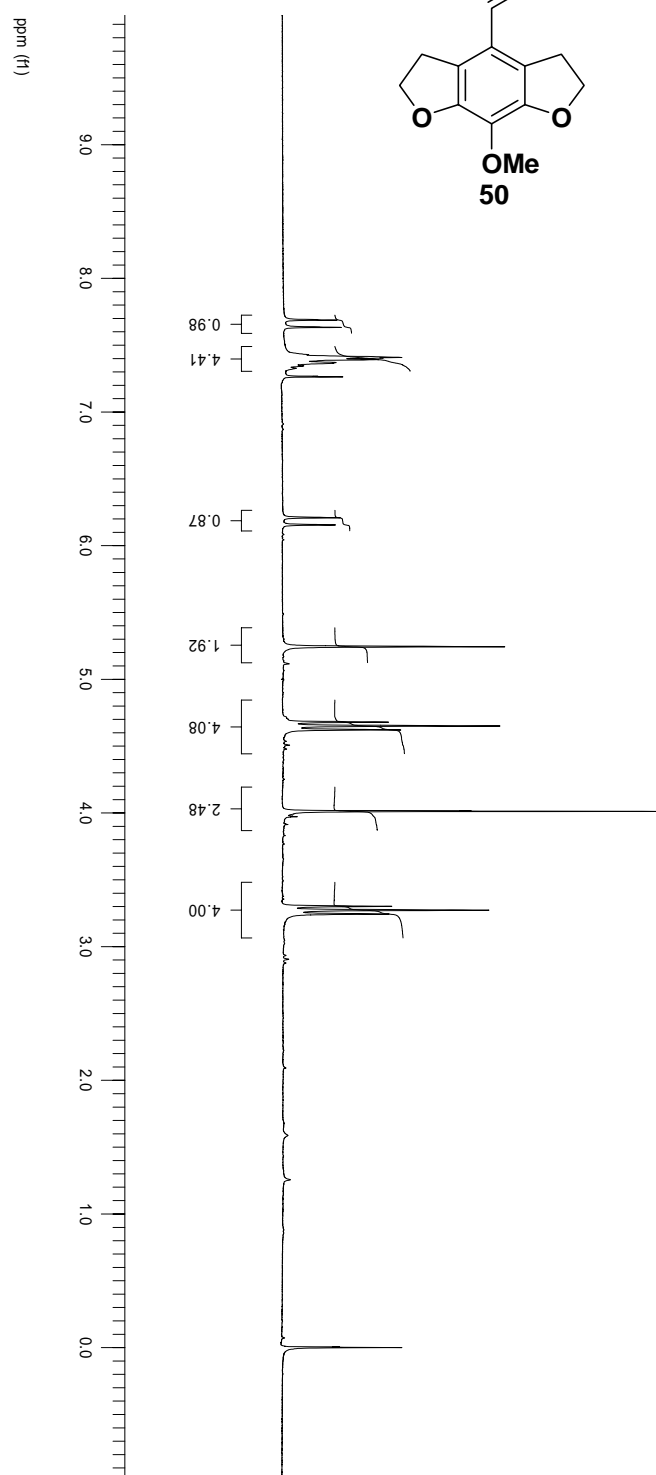

<sup>13</sup>C NMR (75 MHz, CDCl<sub>3</sub>)

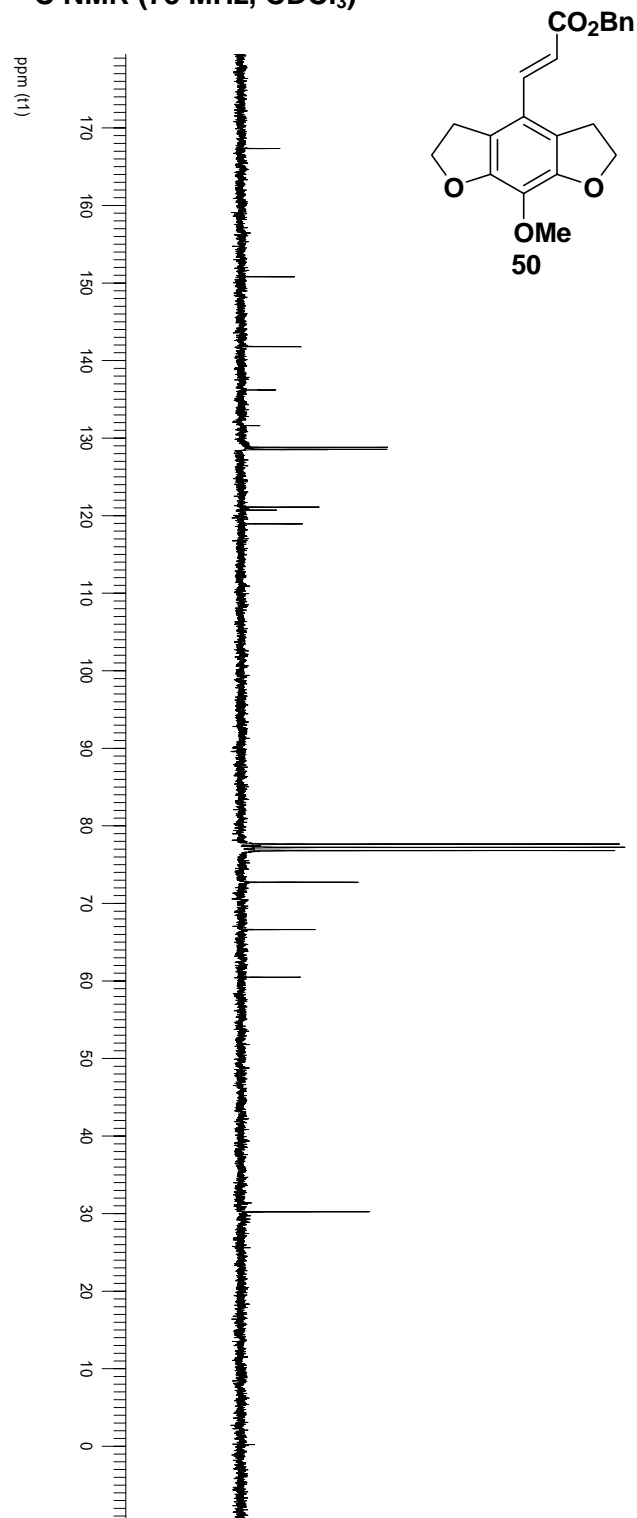

<sup>1</sup>H NMR (300 MHz, CDCl<sub>3</sub>)

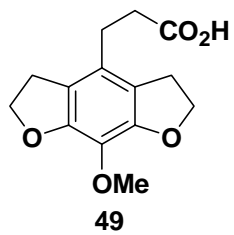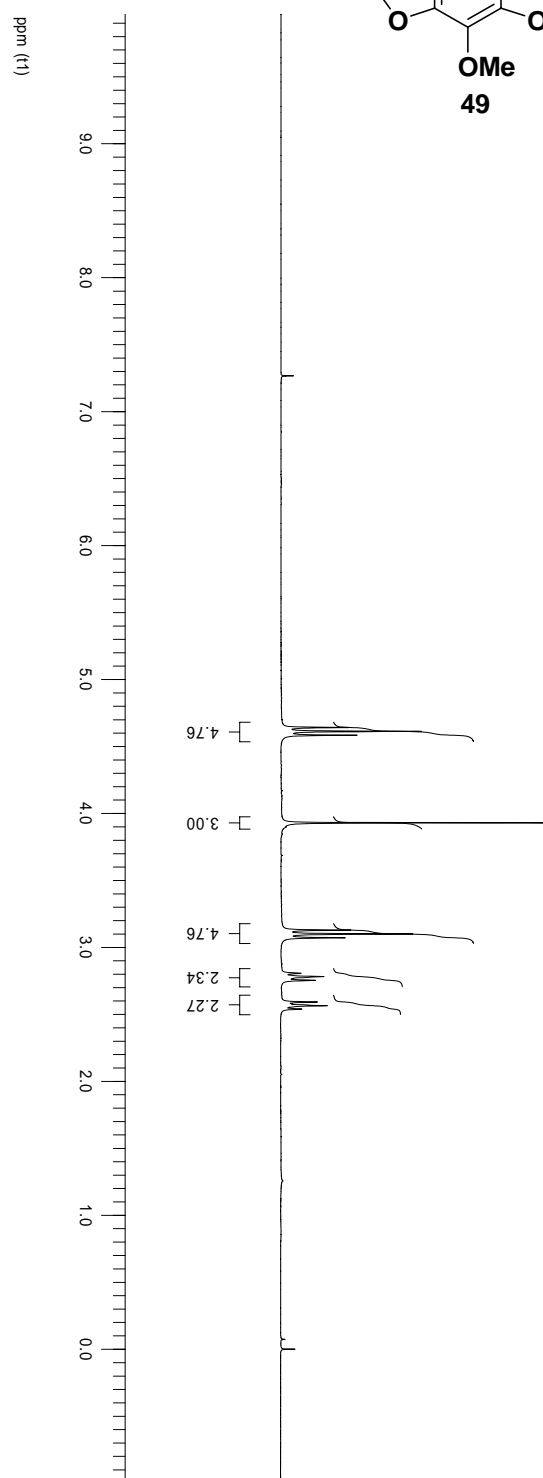

<sup>13</sup>C NMR (75 MHz, CDCl<sub>3</sub>)

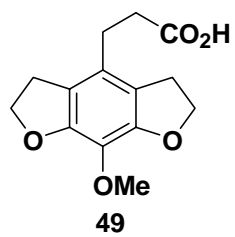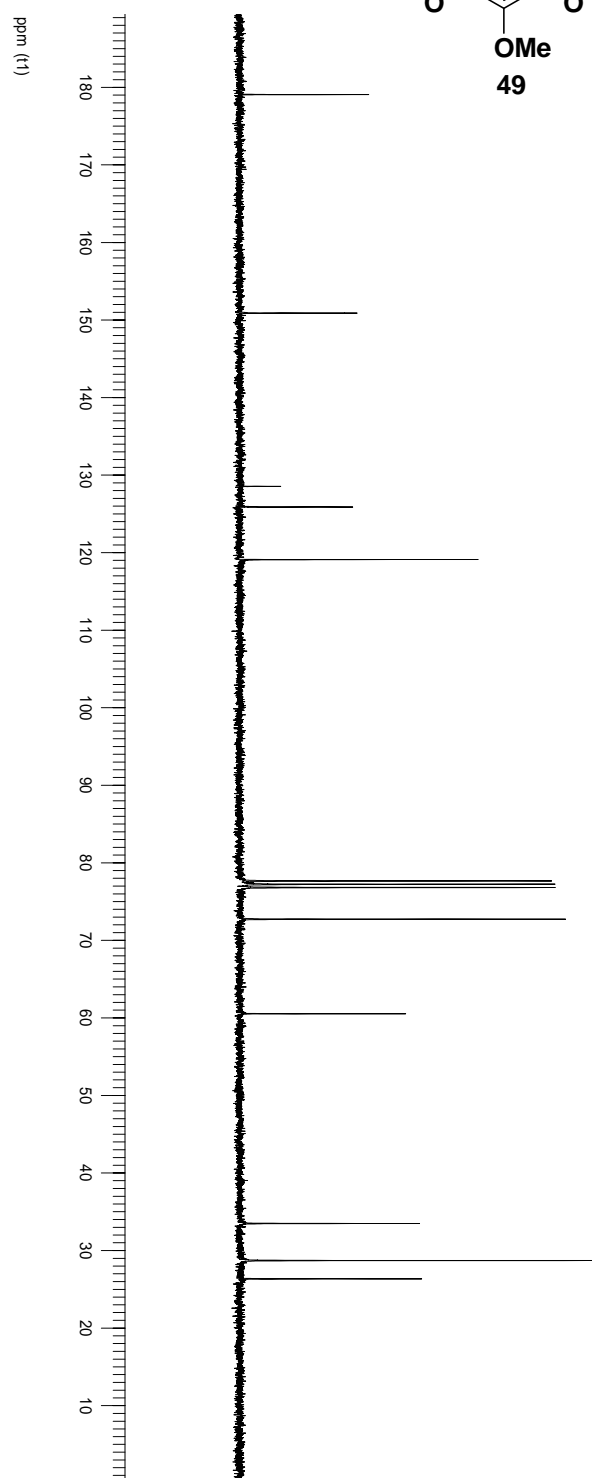



$^1\text{H}$  NMR (300 MHz,  $\text{CDCl}_3$ )

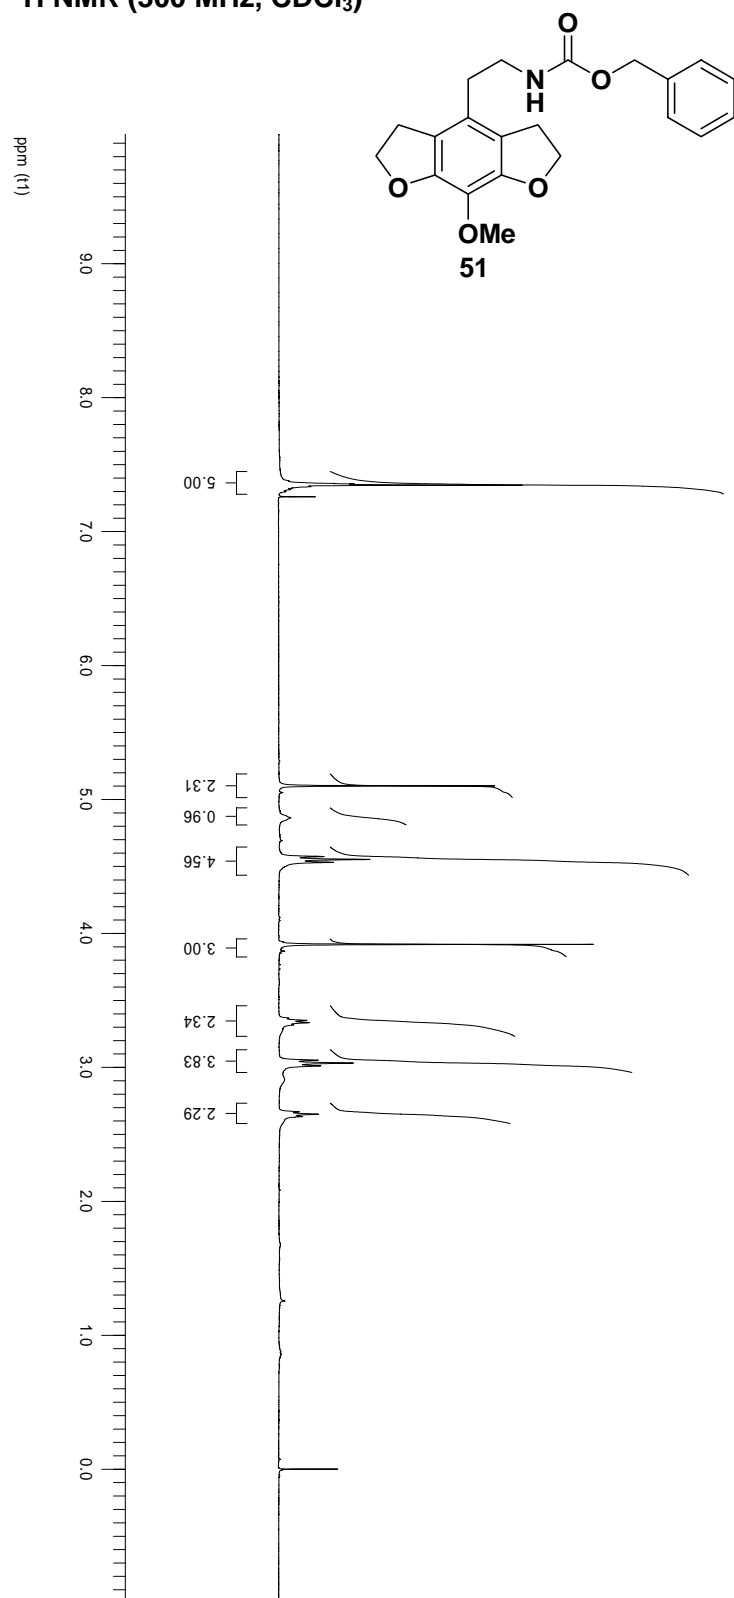

**$^{13}\text{C}$  NMR (75 MHz,  $\text{CDCl}_3$ )**

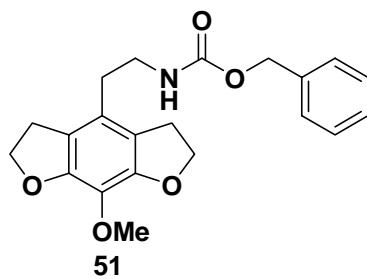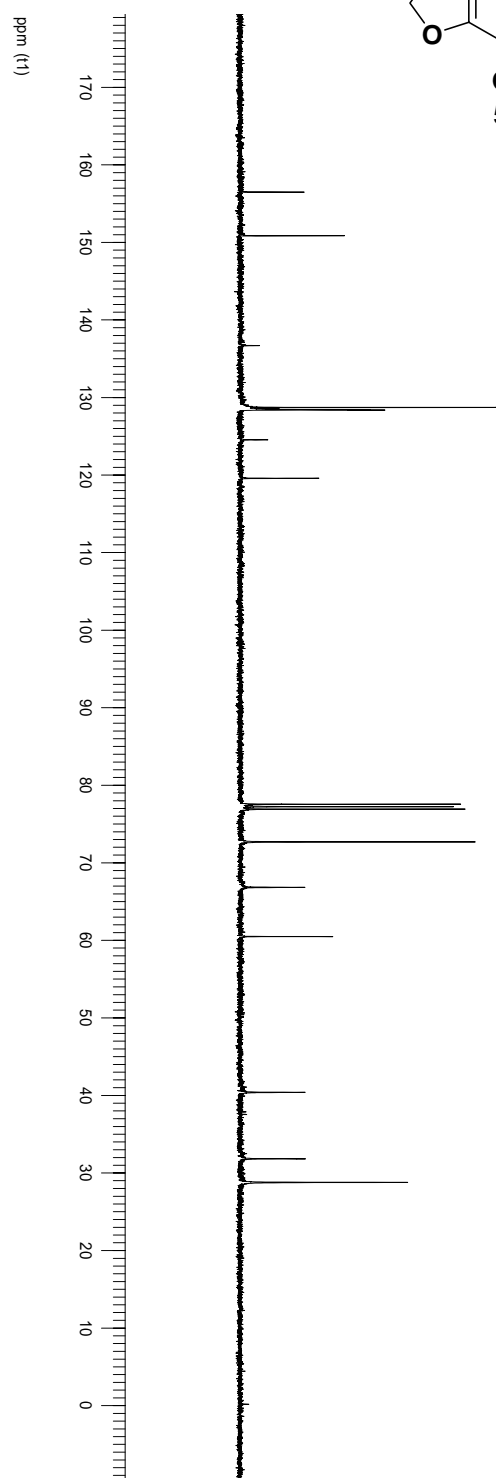

<sup>1</sup>H NMR (400 MHz, CD<sub>3</sub>OD)

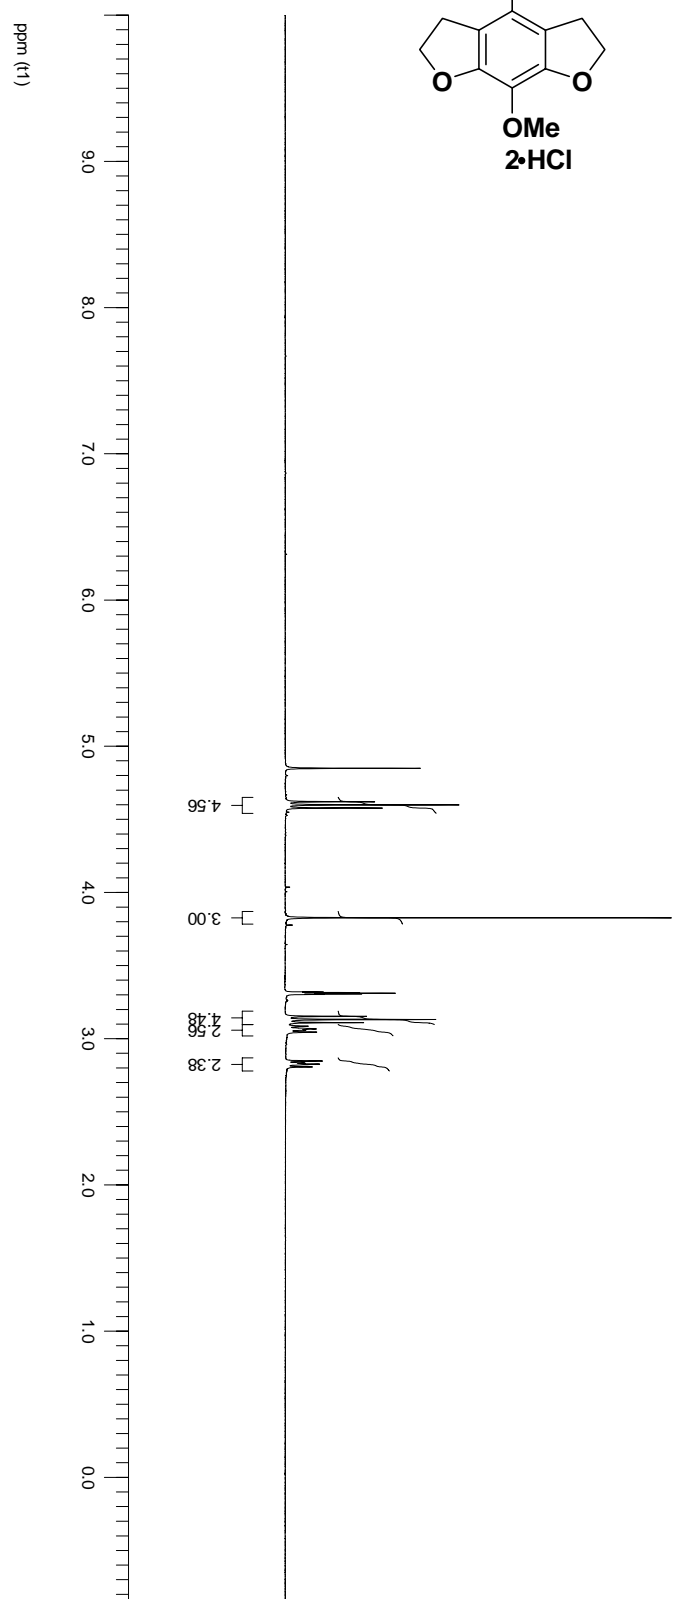

<sup>13</sup>C NMR (100 MHz, CD<sub>3</sub>OD)

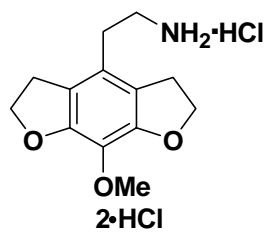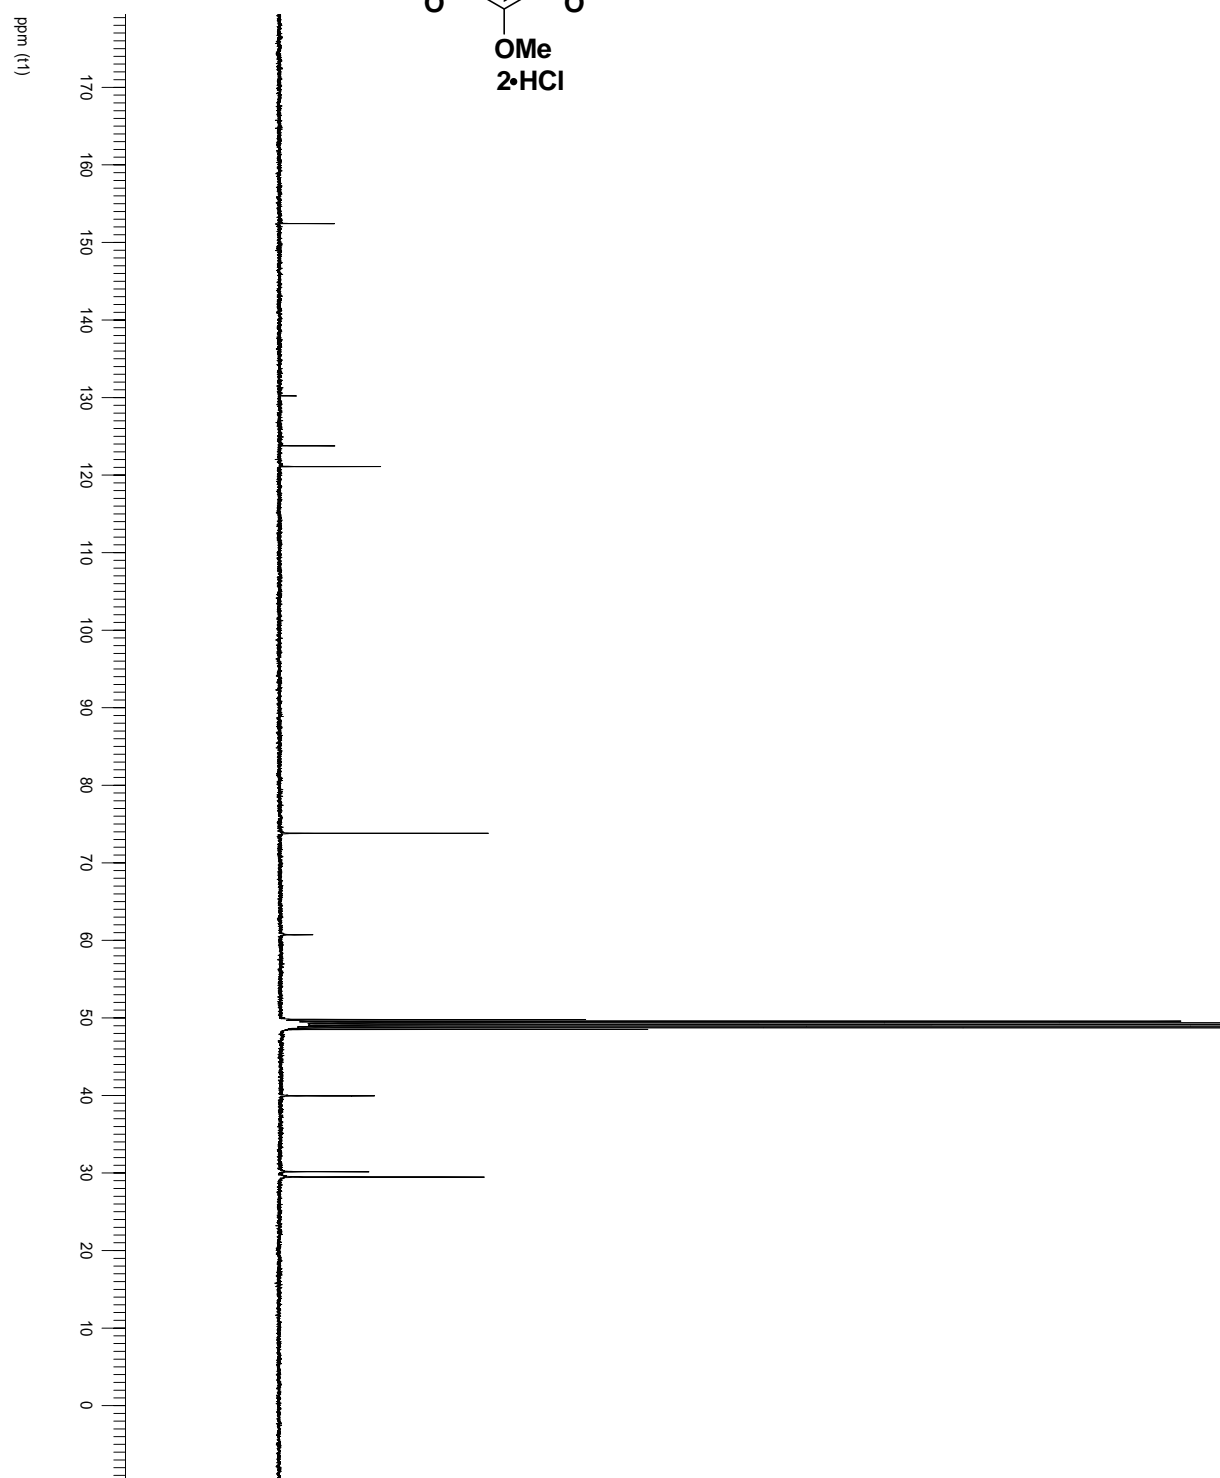

Supplement: Supplementary file 1 [file 4732042]
